# Supplementary material for: Disruption of Nrxn1α within excitatory forebrain circuits drives value-based dysfunction
Source: eLife. 2020 Dec 4;9:e54838. doi: 10.7554/eLife.54838 (PMC7759380; doi:10.7554/eLife.54838)
Supplement: Figure 1—source data 1. [file elife-54838-fig1-data1.xlsx]

## Sheet: KO_Large_Reward_Stay
	Pr(.75)	Pr(.75)	Pr(.75)	Pr(.75)	Pr(.75)	Pr(.75)	Pr(.75)	Pr(.75)	Pr(.75)	Pr(.75)	Pr(.75)	Pr(.75)	Pr(.75)	Pr(.4)	Pr(.4)	Pr(.4)	Pr(.4)	Pr(.4)	Pr(.4)	Pr(.4)	Pr(.4)	Pr(.4)	Pr(.4)	Pr(.4)	Pr(.4)	Pr(.4)
	N1a.367	3N1a.65	154N1a	.N1a.3	64N1a.	40752N1a	.2N1a.3	6N1a.65	O51					N1a.367	3N1a.65	154N1a	.N1a.3	64N1a.	40752N1a	.2N1a.3	6N1a.65	O51
12μL vs 0 μL	0.717	0.61	0.5324	0.817	0.8302	0.7049	0.6446	0.705	0.8182	0.7669				0.6032	0.6	0.9402	0.8625	0.8831	0.6852	0.6286	0.88	0.641	0.6324
12μL vs 2 μL	0.6	0.6022	0.7123	0.8156	0.7803	0.6727	0.687	0.72	0.8421	0.6632				0.6154	0.6444	0.8384	0.6585	0.8718	0.6857	0.5714	0.6136	0.7955	0.7606
12μL vs 6 μL	0.6029	0.6234	0.5714	0.7345	0.7234	0.6067	0.626	0.7462	0.7385	0.6477				0.6901	0.6316	0.8692	0.6471	0.8846	0.7027	0.56	0.7414	0.6528	0.7656
12μL vs 8 μL	0.4848	0.6163	0.6935	0.6087	0.6778	0.6509	0.4615	0.7615	0.52	0.5				0.6444	0.5522	0.7692	0.5094	0.7813	0.7692	0.541	0.4643	0.65	0.5962

## Sheet: KO_Small_Reward_Stay
	Pr(.75)	Pr(.75)	Pr(.75)	Pr(.75)	Pr(.75)	Pr(.75)	Pr(.75)	Pr(.75)	Pr(.75)	Pr(.75)	Pr(.75)	Pr(.75)	Pr(.75)	Pr(.4)	Pr(.4)	Pr(.4)	Pr(.4)	Pr(.4)	Pr(.4)	Pr(.4)	Pr(.4)	Pr(.4)	Pr(.4)	Pr(.4)	Pr(.4)	Pr(.4)
	N1a.367	3N1a.65	154N1a	.N1a.3	64N1a.	40752N1a	.2N1a.3	6N1a.65	O51					N1a.367	3N1a.65	154N1a	.N1a.3	64N1a.	40752N1a	.2N1a.3	6N1a.65	O51
12μL vs 0 μL	0.6087	0.5357	0.5578	0.5806	0.5823	0.4884	0.5328	0.549	0.4766	0.4247				0.5	0.5135	0.6506	0.5781	0.6441	0.5625	0.512	0.5	0.6226	0.5
12μL vs 2 μL	0.5122	0.5	0.5726	0.595	0.6182	0.5474	0.4737	0.45	0.5	0.475				0.5385	0.68	0.6471	0.875	0.7463	0.6333	0.5309	0.7018	0.5806	0.6364
12μL vs 6 μL	0.6512	0.6404	0.6463	0.7747	0.7087	0.596	0.6339	0.6458	0.6529	0.6327				0.54	0.4783	0.6556	0.875	0.8304	0.6071	0.5062	0.6	0.7857	0.726
12μL vs 8 μL	0.6701	0.5529	0.6643	0.8905	0.67	0.6518	0.6894	0.7105	0.7193	0.6869				0.5789	0.6552	0.6909	0.7926	0.7067	0.6429	0.7731	0.7347	0.9351	0.6543

## Sheet: Lose Switch_Aggregate
	Wildtype Pr(Reward) = .75	Wildtype Pr(Reward) = .75	Wildtype Pr(Reward) = .75	Wildtype Pr(Reward) = .75	Wildtype Pr(Reward) = .75	Wildtype Pr(Reward) = .75	Wildtype Pr(Reward) = .75	Wildtype Pr(Reward) = .75	Wildtype Pr(Reward) = .75	Wildtype Pr(Reward) = .75	Wildtype Pr(Reward) = .75	Wildtype Pr(Reward) = .75	Wildtype Pr(Reward) = .75	Wildtype Pr(Reward) = .4	Wildtype Pr(Reward) = .4	Wildtype Pr(Reward) = .4	Wildtype Pr(Reward) = .4	Wildtype Pr(Reward) = .4	Wildtype Pr(Reward) = .4	Wildtype Pr(Reward) = .4	Wildtype Pr(Reward) = .4	Wildtype Pr(Reward) = .4	Wildtype Pr(Reward) = .4	Wildtype Pr(Reward) = .4	Wildtype Pr(Reward) = .4	Wildtype Pr(Reward) = .4	KO Pr(Reward) = .75	KO Pr(Reward) = .75	KO Pr(Reward) = .75	KO Pr(Reward) = .75	KO Pr(Reward) = .75	KO Pr(Reward) = .75	KO Pr(Reward) = .75	KO Pr(Reward) = .75	KO Pr(Reward) = .75	KO Pr(Reward) = .75	KO Pr(Reward) = .75	KO Pr(Reward) = .75	KO Pr(Reward) = .75	KO Pr(Reward) = .4	KO Pr(Reward) = .4	KO Pr(Reward) = .4	KO Pr(Reward) = .4	KO Pr(Reward) = .4	KO Pr(Reward) = .4	KO Pr(Reward) = .4	KO Pr(Reward) = .4	KO Pr(Reward) = .4	KO Pr(Reward) = .4
	N1a.363	.63N1a.	26N1a.1	10N1a.	1N1a.3	6363N1a.302N	1a.110N1a.3	N1a.3676N1a	.3602N1a.53N1	a.N1a.3	6N1a.65147			353N1a7	N1a.4N1	a.65 N1	a.1.15	4N102N	1a.402N1		aOA.N1a	.147N1a.10a.1	54N1a.4	12N1a.4128N1a.10.Dat.32N1a.404N1a.N1			a.1OA8O	A.N1aN1	a.Dat4	04N	1a.46N	1a..N1a.	3OA.N1a	..19		.46N1a.	33N1a.12OA.N1			a.251	A					1a.34N1	a6	1	A
12μL vs 0 μL	0.5195	0.3421	0.4932	0.4262	0.4359	0.3797	0.5479	0.5067	0.451	0.5111	0.4815			0.4586	0.3793	0.3774	0.5074	0.4955	0.4461	0.4333	0.5212	0.5134	0.5286	0.5221			0.411	0.3692	0.5294	0.3	0.4051	0.4068	0.3958	0.4368	0.4634	0.4407				0.4208	0.4161	0.3856	0.3908	0.4444	0.3826	0.4771	0.463	0.4348	0.4467
12μL vs 2 μL	0.411	0.5882	0.5417	0.4286	0.5	0.5652	0.5823	0.4035	0.4921	0.5873	0.5823			0.4646	0.3717	0.4177	0.481	0.6111	0.433	0.4	0.5584	0.4394	0.484	0.4194			0.5472	0.5455	0.5747	0.3095	0.3333	0.4267	0.4675	0.5769	0.6049	0.5692				0.4444	0.4362	0.4569	0.3816	0.5142	0.3832	0.4842	0.4221	0.4933	0.4381
12μL vs 6 μL	0.4902	0.5114	0.5222	0.5094	0.5873	0.4752	0.5	0.5476	0.475	0.2708	0.5441			0.4677	0.43	0.4944	0.4162	0.5245	0.5	0.5417	0.5725	0.5025	0.5472	0.4808			0.2973	0.4561	0.439	0.3488	0.4458	0.4516	0.5469	0.4304	0.4459	0.3333				0.462	0.5074	0.4346	0.2748	0.4304	0.3274	0.4689	0.4338	0.3953	0.4611
12μL vs 8 μL	0.4189	0.5735	0.5176	0.541	0.4624	0.4348	0.4697	0.4167	0.4416	0.4844	0.4493			0.377	0.4611	0.4269	0.4632	0.535	0.4384	0.4628	0.4891	0.4815	0.5215	0.4701			0.4262	0.4717	0.2989	0.3208	0.5152	0.5128	0.4754	0.386	0.5357	0.5439				0.4437	0.5062	0.4458	0.3	0.46	0.403	0.4286	0.4567	0.4161	0.5053
[truncated: 3 more columns]

## Sheet: Maximization_Aggregate
	Wildtype Pr(Reward) = .75	Wildtype Pr(Reward) = .75	Wildtype Pr(Reward) = .75	Wildtype Pr(Reward) = .75	Wildtype Pr(Reward) = .75	Wildtype Pr(Reward) = .75	Wildtype Pr(Reward) = .75	Wildtype Pr(Reward) = .75	Wildtype Pr(Reward) = .75	Wildtype Pr(Reward) = .75	Wildtype Pr(Reward) = .75	Wildtype Pr(Reward) = .75	Wildtype Pr(Reward) = .75	Wildtype Pr(Reward) = .4	Wildtype Pr(Reward) = .4	Wildtype Pr(Reward) = .4	Wildtype Pr(Reward) = .4	Wildtype Pr(Reward) = .4	Wildtype Pr(Reward) = .4	Wildtype Pr(Reward) = .4	Wildtype Pr(Reward) = .4	Wildtype Pr(Reward) = .4	Wildtype Pr(Reward) = .4	Wildtype Pr(Reward) = .4	Wildtype Pr(Reward) = .4	Wildtype Pr(Reward) = .4	KO Pr(Reward) = .75	KO Pr(Reward) = .75	KO Pr(Reward) = .75	KO Pr(Reward) = .75	KO Pr(Reward) = .75	KO Pr(Reward) = .75	KO Pr(Reward) = .75	KO Pr(Reward) = .75	KO Pr(Reward) = .75	KO Pr(Reward) = .75	KO Pr(Reward) = .75	KO Pr(Reward) = .75	KO Pr(Reward) = .75	KO Pr(Reward) = .4	KO Pr(Reward) = .4	KO Pr(Reward) = .4	KO Pr(Reward) = .4	KO Pr(Reward) = .4	KO Pr(Reward) = .4	KO Pr(Reward) = .4	KO Pr(Reward) = .4	KO Pr(Reward) = .4	KO Pr(Reward) = .4
	N1a.363	3N1a.36	2N1a.10	0N1a.3	5N1a.3	63N1a.36N2N1	a.143				71a.65N17						A	A a.3		53NN1a.	36a.65O	A1a.1471a.154		7N1a.4.N1a			.1N1a.1	0N1a.15	02N1a.402N1a8N1a.1084N1a.Dat.412N1a.	4121a.	1OA.OA	.N1a..32			a.N1a.3	OA19	A N1a.Dat40			4N1a.46	N1a..N1a.3N1a.126A.N1a.1.32N1a.46N1a	.34N1a	9	1	251		A		.34N1a.63N1a.6.126N1a.10a.110N1a.11
12μL vs 0 μL	1.44555	1.39321	1.56282	0.781684	0.680934	1.42691	1.73305	0.484042	1.79213	1.79939	2.20424			1.33188	1.09424	0.572951	0.847287	0.492811	1.08745	1.12371	0.534499	1.08972	0.554267	1.04227			0.440234	0.655546	-0.145735	0.65334	1.39785	1.1101	0.655546	0.917609	1.04114	1.64219				0.0184844	0.533401	0.7152	0.213223	0.602653	0	-0.0652419	0.914254	-0.686457	0.400856
12μL vs 2 μL	1.51457	0.871811	0.929918	1.08293	0.817236	1.3654	1.02987	0.146823	1.16688	0.704141	0.839491			0.401949	0.303676	0.641209	-0.373535	0.31022	0.899721	0.479658	0.426009	0.230649	0.488426	0.159881			0.338591	0.6368	0.456655	0.708564	0.630187	0.563058	0.792787	1.40133	1.31689	0.475275				0.0869924	-0.0217464	0.531205	-2.65012	0.0913429	0.219757	0.278596	-0.59715	0.972514	0.56086
12μL vs 6 μL	1.30538	0.191446	-0.219757	0.719625	0.317857	-1.54043	0.640107	0.311311	0.598251	0.0728543	0.7152			-0.397576	0.243721	0.471989	-1.61605	-0.305857	-0.522425	-0.291679	0.553169	-0.080467	0.21649	-0.303676			-0.454465	-0.291679	-0.867349	-1.24566	-0.735122	-0.238274	0.144647	0.570752	0.133766	-0.157705				0.349508	0.135942	0.454465	-3.3215	-1.5699	-0.456655	0.0293577	0.0869924	-1.14414	0.239363
12μL vs 8μL	-0.175118	-1.26859	-0.525717	-1.60775	-0.080467	-1.16575	0.256797	-0.186003	-1.57699	0.0652419	0.853972			0.543283	-0.531205	-2.01158	-1.10217	-0.117448	-0.217579	-0.563058	-0.311311	-0.607056	-0.344049	-0.893019			-0.704141	0.314584	-0.199067	-3.04318	-0.190357	-0.201245	-1.75952	-0.213223	-1.21364	-1.28927				0.144647	0.342958	0.793897	-2.65833	-0.54548	0.261156	-1.50284	-0.666581	-1.70306	-0.712988
[truncated: 29 more columns]

## Sheet: Maximization_v_RAV
Relative Action Value	WT_Pr75	WT_Pr75	KO_Pr75	KO_Pr75	WT_Pr4	WT_Pr4	KO_Pr4	KO_Pr4
	WT_Pr.75	67KO_PrN1a.3	WT_Pr.75	67KO_PrN1a.3	WT_Pr.75	67KO_PrN1a.3	WT_Pr.75	67KO_PrN1a.3
1.6255	1.44555
1.3712	1.51457
0.6595	1.30538
0.0102	-0.175118
1.3279	1.39321
1.2083	0.871811
0.1811	0.191446
-0.4752	-1.26859
1.3372	1.56282
0.8589	0.929918
-0.1178	-0.219757
0.0824	-0.525717
0.9832	0.781684
0.9501	1.08293
0.1994	0.719625
-0.6729	-1.60775
0.9988	0.680934
0.9952	0.817236
0.6682	0.317857
0.1844	-0.080467
1.5612	1.42691
1.1353	1.3654
0.0014	-1.54043
-0.3271	-1.16575
1.6557	1.73305
1.3884	1.02987
1.0514	0.640107
0.2449	0.256797
0.648	0.484042
0.1268	0.146823
0.3404	0.311311
-0.0556	-0.186003
2.1024	1.79213
1.1255	1.16688
0.4891	0.598251
-0.7364	-1.57699
1.5629	1.79939
0.7958	0.704141
0.4043	0.0728543
0.21	0.0652419
1.9415	2.20424
1.0986	0.839491
0.4435	0.7152
0.6511	0.853972
0.4877				0.44023
0.3567				0.33859
-0.2064				-0.4545
-0.7693				-0.7041
0.3042				0.65555
0.4144				0.6368
-0.0734				-0.2917
0.2612				0.31458
-0.1027				-0.1457
0.6143				0.45665
-0.3153				-0.8673
0.1341				-0.1991
1.1707				0.65334
1.102				0.70856
-0.2175				-1.2457
-1.6538				-3.0432
1.2548				1.39785
0.7856				0.63019
0.0725				-0.7351
0.0354				-0.1904
0.9173				1.1101
0.5305				0.56306
0.045				-0.2383
-0.0037				-0.2012
0.4637				0.65555
0.8916				0.79279
-0.0339				0.14465
-0.9514				-1.7595
0.6747				0.91761
1.1451				1.40133
0.4774				0.57075
0.2628				-0.2132
1.5976				1.04114
1.674				1.31689
0.4062				0.13377
-0.8609				-1.2136
1.4947				1.64219
0.7775				0.47528
0.0654				-0.1577
-0.7855				-1.2893
1.9108					1.33188
1.5089					0.40195
-0.3129					-0.3976
0.958					0.54328
0.8109					1.09424
1.0068					0.30368
0.6592					0.24372
0.0903					-0.5312
1.7072					0.57295
1.4978					0.64121
1.6208					0.47199
-0.7885					-2.0116
1.8253					0.84729
-0.0748					-0.3735
-0.2877					-1.6161
-0.0014					-1.1022
1.7186					0.49281
0.8451					0.31022
0.2027					-0.3059
0.4349					-0.1174
2.1972					1.08745
1.4271					0.89972
-0.3543					-0.5224
-0.1499					-0.2176
2.4108					1.12371
3.0415					0.47966
1.3581					-0.2917
0.3005					-0.5631
1.5487					0.5345
0.6794					0.42601
1.0568					0.55317
-0.6109					-0.3113
1.7636					1.08972
0.6931					0.230649
0.7866					-0.080467
-0.5338					-0.607056
1.0322					0.554267
1.6078					0.488426
0.5232					0.21649
-0.7247					-0.344049
1.4481					1.04227
1.026					0.159881
-0.0859					-0.303676
0.8607					-0.893019
0.4187								0.01848
0.3159								0.08699
0.6404								0.34951
-0.4321								0.14465
0.3514								0.5334
-0.1591								-0.0217
0.626								0.13594
0.3996								0.34296
2.1329								0.7152
1.0401								0.53121
1.25								0.45447
-1.3029								0.7939
1.5211								0.21322
-1.2891								-2.6501
-1.3398								-3.3215
0.3937								-2.6583
1.4292								0.60265
0.8381								0.09134
0.4487								-1.5699
0.3937								-0.5455
0.5264								0
0.2336								0.21976
0.4249								-0.4567
0.6162								0.26116
0.4781								-0.0652
0.1641								0.2786
0.2165								0.02936
-1.0616								-1.5028
1.9924								0.91425
-0.393								-0.5972
0.6477								0.08699
-1.1617								-0.6666
0.079								-0.6865
1.0327								0.97251
-0.668								-1.1441
-2.0482								-1.7031
0.5423								0.40086
0.5962								0.56086
0.2092								0.23936
-0.2486								-0.713

## Sheet: RAV_Aggregate
	Wildtype Pr(Reward) = .75	Wildtype Pr(Reward) = .75	Wildtype Pr(Reward) = .75	Wildtype Pr(Reward) = .75	Wildtype Pr(Reward) = .75	Wildtype Pr(Reward) = .75	Wildtype Pr(Reward) = .75	Wildtype Pr(Reward) = .75	Wildtype Pr(Reward) = .75	Wildtype Pr(Reward) = .75	Wildtype Pr(Reward) = .75	Wildtype Pr(Reward) = .75	Wildtype Pr(Reward) = .75	Wildtype Pr(Reward) = .4	Wildtype Pr(Reward) = .4	Wildtype Pr(Reward) = .4	Wildtype Pr(Reward) = .4	Wildtype Pr(Reward) = .4	Wildtype Pr(Reward) = .4	Wildtype Pr(Reward) = .4	Wildtype Pr(Reward) = .4	Wildtype Pr(Reward) = .4	Wildtype Pr(Reward) = .4	Wildtype Pr(Reward) = .4	Wildtype Pr(Reward) = .4	Wildtype Pr(Reward) = .4	KO Pr(Reward) = .75	KO Pr(Reward) = .75	KO Pr(Reward) = .75	KO Pr(Reward) = .75	KO Pr(Reward) = .75	KO Pr(Reward) = .75	KO Pr(Reward) = .75	KO Pr(Reward) = .75	KO Pr(Reward) = .75	KO Pr(Reward) = .75	KO Pr(Reward) = .75	KO Pr(Reward) = .75	KO Pr(Reward) = .75	KO Pr(Reward) = .4	KO Pr(Reward) = .4	KO Pr(Reward) = .4	KO Pr(Reward) = .4	KO Pr(Reward) = .4	KO Pr(Reward) = .4	KO Pr(Reward) = .4	KO Pr(Reward) = .4	KO Pr(Reward) = .4	KO Pr(Reward) = .4
	N1a.363	.63N1a.	26N1a.1	10N1a.	1N1a.3	6363N1a.302N	1a.110N1a.3	N1a.3676N1a	.3602N1a.53N1	a.N1a.3	6N1a.65147			353N1a7	N1a.4N1	a.65 N1	a.1.15	4N102N	1a.402N1		aOA.N1a	.147N1a.10a.1	54N1a.4	12N1a.4128N1a.10.Dat.32N1a.404N1a.N1			a.1OA8O	A.N1aN1	a.Dat4	04N	1a.46N	1a..N1a.	3OA.N1a	..19		.46N1a.	33N1a.12OA.N1			a.251	A					1a.34N1	a6	1	A
12μL vs 0 μL	1.6255	1.3279	1.3372	0.9832	0.9988	1.5612	1.6557	0.648	2.1024	1.5629	1.9415			1.9108	0.8109	1.7072	1.8253	1.7186	2.1972	2.4108	1.5487	1.7636	1.0322	1.4481			0.4877	0.3042	-0.1027	1.1707	1.2548	0.9173	0.4637	0.6747	1.5976	1.4947				0.4187	0.3514	2.1329	1.5211	1.4292	0.5264	0.4781	1.9924	0.079	0.5423
12μL vs 2 μL	1.3712	1.2083	0.8589	0.9501	0.9952	1.1353	1.3884	0.1268	1.1255	0.7958	1.0986			1.5089	1.0068	1.4978	-0.0748	0.8451	1.4271	3.0415	0.6794	0.6931	1.6078	1.026			0.3567	0.4144	0.6143	1.102	0.7856	0.5305	0.8916	1.1451	1.674	0.7775				0.3159	-0.1591	1.0401	-1.2891	0.8381	0.2336	0.1641	-0.393	1.0327	0.5962
12μL vs 6 μL	0.6595	0.1811	-0.1178	0.1994	0.6682	0.0014	1.0514	0.3404	0.4891	0.4043	0.4435			-0.3129	0.6592	1.6208	-0.2877	0.2027	-0.3543	1.3581	1.0568	0.7866	0.5232	-0.0859			-0.2064	-0.0734	-0.3153	-0.2175	0.0725	0.045	-0.0339	0.4774	0.4062	0.0654				0.6404	0.626	1.25	-1.3398	0.4487	0.4249	0.2165	0.6477	-0.668	0.2092
12μL vs 8 μL	0.0102	-0.4752	0.0824	-0.6729	0.1844	-0.3271	0.2449	-0.0556	-0.7364	0.21	0.6511			0.958	0.0903	-0.7885	-0.0014	0.4349	-0.1499	0.3005	-0.6109	-0.5338	-0.7247	0.8607			-0.7693	0.2612	0.1341	-1.6538	0.0354	-0.0037	-0.9514	0.2628	-0.8609	-0.7855				-0.4321	0.3996	-1.3029	0.3937	0.3937	0.6162	-1.0616	-1.1617	-2.0482	-0.2486
[truncated: 29 more columns]

## Sheet: RAV_Aggregate_zscore-1
	Wildtype Pr(Reward) = .75	Wildtype Pr(Reward) = .75	Wildtype Pr(Reward) = .75	Wildtype Pr(Reward) = .75	Wildtype Pr(Reward) = .75	Wildtype Pr(Reward) = .75	Wildtype Pr(Reward) = .75	Wildtype Pr(Reward) = .75	Wildtype Pr(Reward) = .75	Wildtype Pr(Reward) = .75	Wildtype Pr(Reward) = .75	Wildtype Pr(Reward) = .75	Wildtype Pr(Reward) = .75	Knockout	Knockout	Knockout	Knockout	Knockout	Knockout	Knockout	Knockout	Knockout	Knockout	Knockout	Knockout	Knockout
	N1a.363	.63N1a.	26N1a.1	10N1a.	1N1a.3	6363N1a.302N	1a.110N1a.3	N1a.3676N1a	.3602N1a.53N1	a.N1a.3	6N1a.65147			353N1a7	N1a.4N1	a.65 N1	a.1.15	4N102N	1a.402N1		aOA.N1a	.147N1a.10a.1	54N1a.4	12N1a.4128N1a.10.Dat.32N1a.404N1a.N1
0.75	0.946319	0.146999	-0.05078	-0.25115	0.504008	0.136439	1.35757	-0.57334	0.536565	0.438589	1.03083			-1.20028	-0.68896	-0.96393	-0.80303	-0.01961	-0.37518	-0.80929	0.359793	0.567775	-0.28935
0.4	0.561333	0.094639	0.610953	-0.21375	0.320705	0.271242	1.5521	0.181074	0.190511	0.03424	0.309642			-0.41348	-0.31059	0.337682	-0.91017	0.28958	-0.13938	-0.78633	-0.2844	-1.31141	-0.3842

## Sheet: WT_Large_Reward_Stay
	Pr(.75)	Pr(.75)	Pr(.75)	Pr(.75)	Pr(.75)	Pr(.75)	Pr(.75)	Pr(.75)	Pr(.75)	Pr(.75)	Pr(.75)	Pr(.75)	Pr(.75)	Pr(.4)	Pr(.4)	Pr(.4)	Pr(.4)	Pr(.4)	Pr(.4)	Pr(.4)	Pr(.4)	Pr(.4)	Pr(.4)	Pr(.4)	Pr(.4)	Pr(.4)
	N1a.363	36N1a.4	.353N1a	N1a.36	407N1a	.6.52N1a	.N1a.36	75OA.N1	aDat.32N1a.40	.1N1a.4	N1a.532N1a			N1a.363	36N1a.4	.353N1a	N1a.36	407N1a	.6.52N1a	.N1a.36	75OA.N1	aDat.32N1a.40	.1N1a.4	N1a.532N1a
12μL vs 0 μL	0.8624	0.8085	0.8414	0.7019	0.7463	0.8323	0.8859	0.6566	0.7439	0.7895	0.816			0.8481	0.7377	0.8608	0.7647	0.8056	0.9375	0.9146	0.7846	0.8235	0.8033	0.7818
12μL vs 2 μL	0.8224	0.8134	0.75	0.7156	0.7481	0.7947	0.8151	0.5698	0.7008	0.7553	0.75			0.8889	0.8667	0.8413	0.6441	0.7344	0.8824	0.9853	0.6078	0.7647	0.8409	0.7561
12μL vs 6 μL	0.7975	0.5804	0.5766	0.5684	0.7807	0.7429	0.9051	0.4944	0.7429	0.6556	0.6979			0.8909	0.7	0.9365	0.5556	0.6563	0.6613	0.9333	0.7321	0.8592	0.7377	0.6415
12μL vs 8 μL	0.7075	0.6404	0.7925	0.4853	0.7143	0.7083	0.7686	0.4861	0.5616	0.7283	0.6903			0.8974	0.7813	0.7143	0.5227	0.8313	0.8395	0.8868	0.375	0.8871	0.587	0.8621

## Sheet: WT_Small_Reward_Stay
	Pr(.75)	Pr(.75)	Pr(.75)	Pr(.75)	Pr(.75)	Pr(.75)	Pr(.75)	Pr(.75)	Pr(.75)	Pr(.75)	Pr(.75)	Pr(.75)	Pr(.75)	Pr(.4)	Pr(.4)	Pr(.4)	Pr(.4)	Pr(.4)	Pr(.4)	Pr(.4)	Pr(.4)	Pr(.4)	Pr(.4)	Pr(.4)	Pr(.4)	Pr(.4)
	N1a.363	36N1a.4	.353N1a	N1a.36	407N1a	.6.52N1a	.N1a.36	75OA.N1	aDat.32N1a.40	.1N1a.4	N1a.532N1a			N1a.363	36N1a.4	.353N1a	N1a.36	407N1a	.6.52N1a	.N1a.36	75OA.N1	aDat.32N1a.40	.1N1a.4	N1a.532N1a
12μL vs 0 μL	0.5522	0.5281	0.5821	0.4684	0.52	0.5102	0.5972	0.5	0.2619	0.44	0.3889			0.4524	0.5556	0.5286	0.3438	0.4262	0.625	0.4902	0.4364	0.4444	0.5926	0.4571
12μL vs 2 μL	0.5402	0.5657	0.5596	0.4932	0.5234	0.5543	0.5238	0.5385	0.4318	0.5821	0.5			0.6389	0.7037	0.5424	0.661	0.5429	0.6429	0.7619	0.44	0.619	0.5143	0.5263
12μL vs 6 μL	0.6707	0.5357	0.605	0.519	0.646	0.7758	0.7692	0.4103	0.6392	0.5595	0.5972			0.9178	0.5469	0.7447	0.625	0.6092	0.7356	0.7826	0.4872	0.7353	0.625	0.661
12μL vs 8 μL	0.7054	0.7413	0.7786	0.6489	0.6752	0.7711	0.7222	0.5	0.7279	0.6848	0.5375			0.7705	0.7654	0.8462	0.5231	0.7614	0.8587	0.8529	0.525	0.9306	0.7458	0.7255
