# Supplementary material for: Disruption of Nrxn1α within excitatory forebrain circuits drives value-based dysfunction
Source: eLife. 2020 Dec 4;9:e54838. doi: 10.7554/eLife.54838 (PMC7759380; doi:10.7554/eLife.54838)
Supplement: Figure 2—source data 1. [file elife-54838-fig2-data1.xlsx]

## Sheet: Overall Latency to Choice_Aggre
	Wildtype Pr(Reward) = .75	Wildtype Pr(Reward) = .75	Wildtype Pr(Reward) = .75	Wildtype Pr(Reward) = .75	Wildtype Pr(Reward) = .75	Wildtype Pr(Reward) = .75	Wildtype Pr(Reward) = .75	Wildtype Pr(Reward) = .75	Wildtype Pr(Reward) = .75	Wildtype Pr(Reward) = .75	Wildtype Pr(Reward) = .75	Wildtype Pr(Reward) = .75	Wildtype Pr(Reward) = .75	Wildtype Pr(Reward) = .4	Wildtype Pr(Reward) = .4	Wildtype Pr(Reward) = .4	Wildtype Pr(Reward) = .4	Wildtype Pr(Reward) = .4	Wildtype Pr(Reward) = .4	Wildtype Pr(Reward) = .4	Wildtype Pr(Reward) = .4	Wildtype Pr(Reward) = .4	Wildtype Pr(Reward) = .4	Wildtype Pr(Reward) = .4	Wildtype Pr(Reward) = .4	Wildtype Pr(Reward) = .4	KO Pr(Reward) = .75	KO Pr(Reward) = .75	KO Pr(Reward) = .75	KO Pr(Reward) = .75	KO Pr(Reward) = .75	KO Pr(Reward) = .75	KO Pr(Reward) = .75	KO Pr(Reward) = .75	KO Pr(Reward) = .75	KO Pr(Reward) = .75	KO Pr(Reward) = .75	KO Pr(Reward) = .75	KO Pr(Reward) = .75	KO Pr(Reward) = .4	KO Pr(Reward) = .4	KO Pr(Reward) = .4	KO Pr(Reward) = .4	KO Pr(Reward) = .4	KO Pr(Reward) = .4	KO Pr(Reward) = .4	KO Pr(Reward) = .4	KO Pr(Reward) = .4	KO Pr(Reward) = .4
	N1a.363	N1a.363	N1a.367	N1a.36	7N1a.4	02N1a.402N1a	.412N1a.412	N1a.404N1a.	404N1a.46N1a.	46N1a.3	4N1a.34N1a			.63N1a.	63N1a.3	6N1a.36	N1a.65	N1a.65	OA.N1a.1		N1a.1OA	.N1a.3OA.N1a.	3N1a.12	6			26N1a.1	02N1a.1	02N1a.	147	N1a.1	47N1a.10	8N1a.10	8OA.N1a	0.19	OA.N1a.	19			10N1a.1	10N1a.3	53N1a.	353N1a	.154N1	a.154N1a	.Dat.32	N1a.Dat	.32N1a.	251
12μL vs 0 μL	0.2256	0.2217	0.2269	0.2528	0.2757	0.2504	0.2376	0.2168	0.2455	0.2508	0.2518			0.2709	0.2656	0.2246	0.2407	0.2784	0.258	0.241	0.2097	0.2238	0.2575	0.2281			0.2899	0.2787	0.2662	0.2523	0.2156	0.271	0.3284	0.2605	0.2669	0.3014				0.3307	0.3509	0.3099	0.2967	0.2449	0.2556	0.2624	0.2718	0.3448	0.3018
12μL vs 2 μL	0.2207	0.2397	0.2404	0.2291	0.2706	0.2353	0.2256	0.2135	0.2251	0.2921	0.2481			0.2132	0.2254	0.2317	0.233	0.2623	0.2709	0.2666	0.2164	0.2319	0.2504	0.2257			0.2858	0.363	0.2823	0.2726	0.249	0.2503	0.3287	0.2775	0.2857	0.3298				0.2802	0.2633	0.2607	0.2709	0.2376	0.2612	0.2971	0.263	0.2921	0.2968
12μL vs 6 μL	0.2041	0.209	0.22	0.2211	0.2765	0.212	0.2352	0.229	0.2364	0.2292	0.2376			0.2219	0.2221	0.2198	0.2257	0.2513	0.2507	0.2312	0.2139	0.2497	0.2445	0.2566			0.302	0.2842	0.2692	0.2589	0.2383	0.2688	0.3181	0.2741	0.2867	0.3317				0.2827	0.2543	0.2495	0.2507	0.2394	0.2434	0.3446	0.2547	0.3089	0.3053
12μL vs 8 μL	0.2107	0.2177	0.2339	0.2348	0.2554	0.2503	0.2222	0.213	0.2315	0.2784	0.2335			0.2258	0.2151	0.2271	0.2429	0.2682	0.2298	0.2395	0.2147	0.2386	0.2401	0.234			0.2892	0.2886	0.2469	0.2546	0.2185	0.2461	0.2943	0.2634	0.3024	0.3275				0.2866	0.2841	0.2634	0.2483	0.2215	0.2471	0.2814	0.2569	0.3167	0.2676
[truncated: 29 more columns]

## Sheet: Overall Latency to Initiate_Agg
	Wildtype Pr(Reward) = .75	Wildtype Pr(Reward) = .75	Wildtype Pr(Reward) = .75	Wildtype Pr(Reward) = .75	Wildtype Pr(Reward) = .75	Wildtype Pr(Reward) = .75	Wildtype Pr(Reward) = .75	Wildtype Pr(Reward) = .75	Wildtype Pr(Reward) = .75	Wildtype Pr(Reward) = .75	Wildtype Pr(Reward) = .75	Wildtype Pr(Reward) = .75	Wildtype Pr(Reward) = .75	Wildtype Pr(Reward) = .4	Wildtype Pr(Reward) = .4	Wildtype Pr(Reward) = .4	Wildtype Pr(Reward) = .4	Wildtype Pr(Reward) = .4	Wildtype Pr(Reward) = .4	Wildtype Pr(Reward) = .4	Wildtype Pr(Reward) = .4	Wildtype Pr(Reward) = .4	Wildtype Pr(Reward) = .4	Wildtype Pr(Reward) = .4	Wildtype Pr(Reward) = .4	Wildtype Pr(Reward) = .4	KO Pr(Reward) = .75	KO Pr(Reward) = .75	KO Pr(Reward) = .75	KO Pr(Reward) = .75	KO Pr(Reward) = .75	KO Pr(Reward) = .75	KO Pr(Reward) = .75	KO Pr(Reward) = .75	KO Pr(Reward) = .75	KO Pr(Reward) = .75	KO Pr(Reward) = .75	KO Pr(Reward) = .75	KO Pr(Reward) = .75	KO Pr(Reward) = .4	KO Pr(Reward) = .4	KO Pr(Reward) = .4	KO Pr(Reward) = .4	KO Pr(Reward) = .4	KO Pr(Reward) = .4	KO Pr(Reward) = .4	KO Pr(Reward) = .4	KO Pr(Reward) = .4	KO Pr(Reward) = .4
	N1a.363	N1a.363	N1a.367	N1a.36	7N1a.4	02N1a.402N1a	.412N1a.412	N1a.404N1a.	404N1a.46N1a.	46N1a.3	4N1a.34N1a			.63N1a.	63N1a.3	6N1a.36	N1a.65	N1a.65	OA.N1a.1		N1a.1OA	.N1a.3OA.N1a.	3N1a.12	6			26N1a.1	02N1a.1	02N1a.	147	N1a.1	47N1a.10	8N1a.10	8OA.N1a	0.19	OA.N1a.	19			10N1a.1	10N1a.3	53N1a.	353N1a	.154N1	a.154N1a	.Dat.32	N1a.Dat	.32N1a.	251
12μL vs 0 μL	9.4706	6.9022	8.0785	10.1052	5.5612	5.6964	7.5444	8.3143	15.3764	14.3977	9.9701			8.2422	8.0794	5.3854	11.9021	4.7091	3.2739	6.5645	7.6158	5.1198	8.987	10.7604			7.8317	9.7413	5.4141	4.4304	6.2278	8.7686	3.9745	6.2083	5.9598	6.3541				6.787	10.0474	2.1556	4.5489	5.5041	9.6998	1.6098	7.6533	10.672	5.1762
12μL vs 2 μL	4.8328	6.6801	5.2521	10.6243	5.3009	5.86	7.8402	10.8724	7.9825	11.0042	7.6846			5.4638	5.8833	8.1661	8.5814	5.2858	5.0337	6.9134	8.7791	6.3065	8.6225	12.6467			9.2811	12.6911	4.0699	4.7209	6.3866	8.2017	7.049	5.6193	5.9402	7.2684				14.1695	10.2377	3.2327	4.4714	5.1646	16.2975	2.7033	9.273	11.0367	5.2213
12μL vs 6 μL	5.5945	6.688	6.6096	11.3182	6.0401	3.2968	6.4729	11.2568	7.683	11.5136	10.6973			6.688	5.9719	7.8817	6.9673	4.7148	4.9436	7.3161	10.4337	5.7794	7.4844	8.0312			13.1472	12.2815	4.3283	4.0152	6.8363	9.5722	7.227	7.067	6.1253	7.514				7.761	10.4449	2.3971	2.7848	4.346	15.7126	4.9431	9.045	3.6586	4.9507
12μL vs 8 μL	6.8218	7.2043	6.1798	9.3031	4.5238	5.5239	7.763	12.2018	7.7761	9.8228	8.3486			5.8325	5.5872	7.6337	7.4858	2.9281	3.228	6.8455	11.7482	4.5223	7.8699	12.0238			10.4683	11.3656	5.2166	4.235	9.5338	7.421	9.1552	8.339	9.7916	8.1434				9.3789	7.8995	4.1478	3.0865	5.856	11.0459	3.7497	12.6104	8.5418	5.0038
[truncated: 3 more columns]

## Sheet: RelativeLatInit_v_RAV
Relative Action Value	WT_Pr75	WT_Pr75	KO_Pr75	KO_Pr75	WT_Pr4	WT_Pr4	KO_Pr4	KO_Pr4
	WT_Pr.75	N1a.364N1a.3	WT_Pr.75	N1a.364N1a.3	WT_Pr.75	N1a.364N1a.3	WT_Pr.75	N1a.364N1a.3
1.6255	-0.418976
1.3712	-0.447889
0.6595	-0.142874
0.0102	-0.0929551
1.3279	-0.291502
1.2083	-0.106676
0.1811	-0.137839
-0.4752	-0.160342
1.3372	-0.460137
0.8589	-0.531467
-0.1178	-0.23094
0.0824	-0.0334785
0.9832	-0.10204
0.9501	0.0818405
0.1994	-0.220713
-0.6729	0.0761682
0.9988	-0.393026
0.9952	0.134145
0.6682	-0.255492
0.1844	0.266558
1.5612	-0.268585
1.1353	-0.301244
0.0014	-0.313256
-0.3271	0.0268285
1.6557	-0.717573
1.3884	-0.591249
1.0514	-0.504649
0.2449	-0.179162
0.648	0.431281
0.1268	0.191567
0.3404	-0.13326
-0.0556	-0.0488551
2.1024	-0.337381
1.1255	-0.171631
0.4891	-0.34215
-0.7364	0.209956
1.5629	-0.099721
0.7958	-0.419141
0.4043	-0.103376
0.21	0.137624
1.9415	-0.447936
1.0986	-0.132375
0.4435	-0.412474
0.6511	0.257979
0.4877				0.216768
0.3567				0.319142
-0.2064				0.487585
-0.7693				-0.085435
0.3042				-0.0787513
0.4144				0.248263
-0.0734				-0.261063
0.2612				-0.330332
-0.1027				-0.109722
0.6143				0.495465
-0.3153				-0.173841
0.1341				-0.166063
1.1707				-0.202119
1.102				-0.232618
-0.2175				-0.175291
-1.6538				-0.0361872
1.2548				-0.0490068
0.7856				0.320472
0.0725				-0.0684941
0.0354				0.129483
0.9173				-0.27362
0.5305				0.423824
0.045				0.405058
-0.0037				-0.444988
0.4637				0.355144
0.8916				0.0553752
-0.0339				-0.208368
-0.9514				0.453159
0.6747				0.076463
1.1451				0.240183
0.4774				0.119034
0.2628				0.00381007
1.5976				-0.0201264
1.674				-0.369669
0.4062				-0.122801
-0.8609				1.28333
1.4947				0.0453148
0.7775				0.002693
0.0654				-0.00929582
-0.7855				0.598782
1.9108					-0.735325
1.5089					-0.323163
-0.3129					-0.105489
0.958					-0.0912217
0.8109					0.0176302
1.0068					-0.317266
0.6592					-0.00523551
0.0903					-0.280405
1.7072					-0.53031
1.4978					-0.540738
1.6208					-0.541512
-0.7885					0.379023
1.8253					-0.411605
-0.0748					0.00302777
-0.2877					0.0680908
-0.0014					0.131379
1.7186					-0.406325
0.8451					-0.200028
0.2027					-0.288274
0.4349					-0.24579
2.1972					-0.603273
1.4271					-0.230499
-0.3543					0.0775682
-0.1499					0.0328029
2.4108					-0.485993
3.0415					-0.694173
1.3581					-0.141164
0.3005					-0.00860508
1.5487					-0.404167
0.6794					0.0134291
1.0568					-0.408849
-0.6109					-0.267625
1.7636					-0.779091
0.6931					-0.501835
0.7866					-0.138024
-0.5338					-0.165266
1.0322					0.015418
1.6078					0.140001
0.5232					-0.134129
-0.7247					0.212919
1.4481					-0.439838
1.026					-0.532411
-0.0859					0.299118
0.8607					-0.354445
0.4187								0.621719
0.3159								-0.0262393
0.6404								0.038379
-0.4321								0.0885592
0.3514								0.486382
-0.1591								0.103594
0.626								0.404804
0.3996								0.198058
2.1329								-0.342795
1.0401								-0.215644
1.25								-0.013328
-1.3029								0.736062
1.5211								-0.218311
-1.2891								0.339725
-1.3398								0.277752
0.3937								0.677162
1.4292								-0.262669
0.8381								0.14275
0.4487								0.759872
0.3937								-0.263697
0.5264								-0.108872
0.2336								-0.46562
0.4249								-0.291474
0.6162								-0.170402
0.4781								-0.192024
0.1641								0.30412
0.2165								0.499609
-1.0616								-0.207648
1.9924								0.243631
-0.393								-0.190985
0.6477								0.0665573
-1.1617								-0.334653
0.079								-0.355531
1.0327								-0.414383
-0.668								-0.356296
-2.0482								0.484747
0.5423								0.743011
0.5962								-0.469644
0.2092								0.0464
-0.2486								0.505615

## Sheet: RelLatInit_Aggregate
	Wildtype Pr(Reward) = .75	Wildtype Pr(Reward) = .75	Wildtype Pr(Reward) = .75	Wildtype Pr(Reward) = .75	Wildtype Pr(Reward) = .75	Wildtype Pr(Reward) = .75	Wildtype Pr(Reward) = .75	Wildtype Pr(Reward) = .75	Wildtype Pr(Reward) = .75	Wildtype Pr(Reward) = .75	Wildtype Pr(Reward) = .75	Wildtype Pr(Reward) = .75	Wildtype Pr(Reward) = .75	Wildtype Pr(Reward) = .4	Wildtype Pr(Reward) = .4	Wildtype Pr(Reward) = .4	Wildtype Pr(Reward) = .4	Wildtype Pr(Reward) = .4	Wildtype Pr(Reward) = .4	Wildtype Pr(Reward) = .4	Wildtype Pr(Reward) = .4	Wildtype Pr(Reward) = .4	Wildtype Pr(Reward) = .4	Wildtype Pr(Reward) = .4	Wildtype Pr(Reward) = .4	Wildtype Pr(Reward) = .4	KO Pr(Reward) = .75	KO Pr(Reward) = .75	KO Pr(Reward) = .75	KO Pr(Reward) = .75	KO Pr(Reward) = .75	KO Pr(Reward) = .75	KO Pr(Reward) = .75	KO Pr(Reward) = .75	KO Pr(Reward) = .75	KO Pr(Reward) = .75	KO Pr(Reward) = .75	KO Pr(Reward) = .75	KO Pr(Reward) = .75	KO Pr(Reward) = .4	KO Pr(Reward) = .4	KO Pr(Reward) = .4	KO Pr(Reward) = .4	KO Pr(Reward) = .4	KO Pr(Reward) = .4	KO Pr(Reward) = .4	KO Pr(Reward) = .4	KO Pr(Reward) = .4	KO Pr(Reward) = .4
	N1a.363	N1a.363	N1a.367	N1a.36	7N1a.4	02N1a.402N1a	.412N1a.412	N1a.404N1a.	404N1a.46N1a.	46N1a.3	4N1a.34N1a			.63N1a.	63N1a.3	6N1a.36	N1a.65	N1a.65	OA.N1a.1		N1a.1OA	.N1a.3OA.N1a.	3N1a.12	6			26N1a.1	02N1a.1	02N1a.	147	N1a.1	47N1a.10	8N1a.10	8OA.N1a	0.19	OA.N1a.	19			10N1a.1	10N1a.3	53N1a.	353N1a	.154N1	a.154N1a	.Dat.32	N1a.Dat	.32N1a.	251
12μL vs 0 μL	-0.418976	-0.291502	-0.460137	-0.10204	-0.393026	-0.268585	-0.717573	0.431281	-0.337381	-0.099721	-0.447936			-0.735325	0.0176302	-0.53031	-0.411605	-0.406325	-0.603273	-0.485993	-0.404167	-0.779091	0.015418	-0.439838			0.216768	-0.0787513	-0.109722	-0.202119	-0.0490068	-0.27362	0.355144	0.076463	-0.0201264	0.0453148				0.621719	0.486382	-0.342795	-0.218311	-0.262669	-0.108872	-0.192024	0.243631	-0.355531	0.743011
12μL vs 2 μL	-0.447889	-0.106676	-0.531467	0.0818405	0.134145	-0.301244	-0.591249	0.191567	-0.171631	-0.419141	-0.132375			-0.323163	-0.317266	-0.540738	0.00302777	-0.200028	-0.230499	-0.694173	0.0134291	-0.501835	0.140001	-0.532411			0.319142	0.248263	0.495465	-0.232618	0.320472	0.423824	0.0553752	0.240183	-0.369669	0.002693				-0.0262393	0.103594	-0.215644	0.339725	0.14275	-0.46562	0.30412	-0.190985	-0.414383	-0.469644
12μL vs 6 μL	-0.142874	-0.137839	-0.23094	-0.220713	-0.255492	-0.313256	-0.504649	-0.13326	-0.34215	-0.103376	-0.412474			-0.105489	-0.00523551	-0.541512	0.0680908	-0.288274	0.0775682	-0.141164	-0.408849	-0.138024	-0.134129	0.299118			0.487585	-0.261063	-0.173841	-0.175291	-0.0684941	0.405058	-0.208368	0.119034	-0.122801	-0.00929582				0.038379	0.404804	-0.013328	0.277752	0.759872	-0.291474	0.499609	0.0665573	-0.356296	0.0464
12μL vs 8 μL	-0.0929551	-0.160342	-0.0334785	0.0761682	0.266558	0.0268285	-0.179162	-0.0488551	0.209956	0.137624	0.257979			-0.0912217	-0.280405	0.379023	0.131379	-0.24579	0.0328029	-0.00860508	-0.267625	-0.165266	0.212919	-0.354445			-0.085435	-0.330332	-0.166063	-0.0361872	0.129483	-0.444988	0.453159	0.00381007	1.28333	0.598782				0.0885592	0.198058	0.736062	0.677162	-0.263697	-0.170402	-0.207648	-0.334653	0.484747	0.505615
[truncated: 3 more columns]
