# Supplementary material for: Disruption of Nrxn1α within excitatory forebrain circuits drives value-based dysfunction
Source: eLife. 2020 Dec 4;9:e54838. doi: 10.7554/eLife.54838 (PMC7759380; doi:10.7554/eLife.54838)
Supplement: Figure 3—source data 1. [file elife-54838-fig3-data1.xlsx]

## Sheet: Effort_ Latency to Choice (25 T
	N1a.WT_Fr3 v Fr1	N1a.WT_Fr3 v Fr1	N1a.WT_Fr3 v Fr1	N1a.WT_Fr3 v Fr1	N1a.WT_Fr3 v Fr1	N1a.WT_Fr3 v Fr1	N1a.WT_Fr3 v Fr1	N1a.WT_Fr3 v Fr1	N1a.WT_Fr3 v Fr1	N1a.WT_Fr3 v Fr1	N1a.WT_Fr3 v Fr1	N1a.WT_Fr3 v Fr1	N1a.WT_Fr3 v Fr1	N1a.Het_Fr3 v Fr1	N1a.Het_Fr3 v Fr1	N1a.Het_Fr3 v Fr1	N1a.Het_Fr3 v Fr1	N1a.Het_Fr3 v Fr1	N1a.Het_Fr3 v Fr1	N1a.Het_Fr3 v Fr1	N1a.Het_Fr3 v Fr1	N1a.Het_Fr3 v Fr1	N1a.Het_Fr3 v Fr1	N1a.Het_Fr3 v Fr1	N1a.Het_Fr3 v Fr1	N1a.Het_Fr3 v Fr1	N1a.KO_Fr3 v Fr1	N1a.KO_Fr3 v Fr1	N1a.KO_Fr3 v Fr1	N1a.KO_Fr3 v Fr1	N1a.KO_Fr3 v Fr1	N1a.KO_Fr3 v Fr1	N1a.KO_Fr3 v Fr1	N1a.KO_Fr3 v Fr1	N1a.KO_Fr3 v Fr1	N1a.KO_Fr3 v Fr1	N1a.KO_Fr3 v Fr1	N1a.KO_Fr3 v Fr1	N1a.KO_Fr3 v Fr1
	N1a.363	N1a.364	N1a.367	N1a.40	2N1a.3	65N1a.41	2N1a.40	4N1a.40	5N1a.46N1a.34	N1a.406	N1a.63N1a.			36N1a.4	07N1a.6	5OA.N1a	.1N1a.4	08OA.N1	a.3N1a.	126N1a.	411N1a.	102N1a	.147N1	a.414N	1a.108		OA.N1a.	19	1a.35N	1a.110	N1a.35	3N1a.52N	1a.154N	1a.Dat.	32N1a.5	3N1a.25	1
25	0.29095	0.2781	0.26495	0.26625	0.3036	0.2225	0.27375	0.21505	0.2233	0.2619	0.2615			0.30395	0.2649	0.25385	0.3098	0.24945	0.20725	0.3077	0.25185	0.2918	0.3969	0.27095	0.3472		0.3009	0.29395	0.27305	0.27675	0.28575	0.23525		0.234	0.29555	0.3476	0.286
50	0.2775	0.3051	0.2504	0.25975	0.2957	0.28145	0.24215	0.22075	0.2256	0.244	0.26435			0.25845	0.23395	0.2139	0.31535	0.26645	0.2349	0.3514	0.2367	0.26365	0.34785	0.2457	0.3075		0.25935	0.27805	0.22655	0.2717	0.1949	0.2102		0.2236	0.25045	0.302	0.35155
75	0.316	0.2507	0.2562	0.2352	0.281	0.22405	0.23275	0.2122	0.19795	0.25905	0.25485			0.26525	0.22745	0.2238	0.29715	0.2751	0.19215	0.38785	0.23325	0.29005	0.3409	0.23505	0.2431		0.2393	0.25215	0.23855	0.26205	0.21505	0.2397		0.23285	0.27625	0.33015	0.3077
100	0.22075	0.2449	0.22545	0.21985	0.2639	0.2092	0.30225	0.2048	0.2448	0.2349	0.24235			0.23495	0.2193	0.1974	0.2702	0.31555	0.188	0.35715	0.2221	0.23795	0.2947	0.22145	0.3165		0.25825	0.25435	0.22655	0.28365	0.2921	0.21775		0.30515	0.32205	0.34495	0.33235
125	0.223	0.2507	0.2741	0.2347	0.28635	0.219	0.22565	0.20485	0.19475	0.2407	0.2558			0.30135	0.21395	0.28975	0.2704	0.2666	0.26665	0.321	0.26225	0.2886	0.33765	0.29195	0.3364		0.2482	0.25725	0.22145	0.25125	0.21925	0.2434		0.2235	0.28625	0.31365	0.3875
150	0.2288	0.2524	0.21735	0.22025	0.26315	0.21535	0.222	0.2184	0.21755	0.2244	0.24005			0.24645	0.2455	0.2224	0.3403	0.24655	0.2082	0.34145	0.26155	0.42475	0.2996	0.2846				0.2641	0.24875	0.2568	0.21455	0.21635		0.22655	0.38045	0.27235	0.32425

## Sheet: Effort_ Latency to Choice_Last7
N1a.WT	N1a.WT	N1a.WT	N1a.WT	N1a.WT	N1a.WT	N1a.WT	N1a.WT	N1a.WT	N1a.WT	N1a.WT	N1a.WT	N1a.WT	N1a.Het_Fr3 v Fr1	N1a.Het_Fr3 v Fr1	N1a.Het_Fr3 v Fr1	N1a.Het_Fr3 v Fr1	N1a.Het_Fr3 v Fr1	N1a.Het_Fr3 v Fr1	N1a.Het_Fr3 v Fr1	N1a.Het_Fr3 v Fr1	N1a.Het_Fr3 v Fr1	N1a.Het_Fr3 v Fr1	N1a.Het_Fr3 v Fr1	N1a.Het_Fr3 v Fr1	N1a.Het_Fr3 v Fr1	N1a.KO	N1a.KO	N1a.KO	N1a.KO	N1a.KO	N1a.KO	N1a.KO	N1a.KO	N1a.KO	N1a.KO	N1a.KO	N1a.KO	N1a.KO
N1a.363	N1a.364	N1a.367	N1a.40	2N1a.3	65N1a.412N1a	.404N1a.405	N1a.46N1a.3	4N1a.406N1a.6	3N1a.36	N1a.407N1a			.65OA.N	1a.1	N1a.40	8OA.N1a	.3N1a.1	26	1a.411N	1a.102N	1a.147		a.414N	1a.108		OA.N1a.	19	1a.35N	1a.110	N1a.35	3N1a.52N	1a.154N	1a.Dat.	32N1a.5	3N1a.25	1
0.224183	0.249333	0.238967	0.224933	0.271133	0.214517	0.249967	0.20935	0.219033	0.233333	0.246067																0.253225	0.258567	0.23225	0.2639	0.241967	0.225833		0.251733	0.329583	0.310317	0.348033

## Sheet: Effort_ Latency to Initiate (25
	N1a.WT_Fr3 v Fr1	N1a.WT_Fr3 v Fr1	N1a.WT_Fr3 v Fr1	N1a.WT_Fr3 v Fr1	N1a.WT_Fr3 v Fr1	N1a.WT_Fr3 v Fr1	N1a.WT_Fr3 v Fr1	N1a.WT_Fr3 v Fr1	N1a.WT_Fr3 v Fr1	N1a.WT_Fr3 v Fr1	N1a.WT_Fr3 v Fr1	N1a.WT_Fr3 v Fr1	N1a.WT_Fr3 v Fr1	N1a.Het_Fr3 v Fr1	N1a.Het_Fr3 v Fr1	N1a.Het_Fr3 v Fr1	N1a.Het_Fr3 v Fr1	N1a.Het_Fr3 v Fr1	N1a.Het_Fr3 v Fr1	N1a.Het_Fr3 v Fr1	N1a.Het_Fr3 v Fr1	N1a.Het_Fr3 v Fr1	N1a.Het_Fr3 v Fr1	N1a.Het_Fr3 v Fr1	N1a.Het_Fr3 v Fr1	N1a.Het_Fr3 v Fr1	N1a.KO_Fr3 v Fr1	N1a.KO_Fr3 v Fr1	N1a.KO_Fr3 v Fr1	N1a.KO_Fr3 v Fr1	N1a.KO_Fr3 v Fr1	N1a.KO_Fr3 v Fr1	N1a.KO_Fr3 v Fr1	N1a.KO_Fr3 v Fr1	N1a.KO_Fr3 v Fr1	N1a.KO_Fr3 v Fr1	N1a.KO_Fr3 v Fr1	N1a.KO_Fr3 v Fr1	N1a.KO_Fr3 v Fr1
	N1a.363	N1a.364	N1a.367	N1a.40	2N1a.3	65N1a.41	2N1a.40	4N1a.40	5N1a.46N1a.34	N1a.406	N1a.63N1a.			36N1a.4	07N1a.6	5OA.N1a	.1N1a.4	08OA.N1	a.3N1a.	126N1a.	411N1a.	102N1a	.147N1	a.414N	1a.108		OA.N1a.	19	1a.35N	1a.110	N1a.35	3N1a.52N	1a.154N	1a.Dat.	32N1a.5	3N1a.25	1
25	6.95235	3.17375	3.43105	4.7557	3.1503	4.4137	12.0869	7.3866	2.838	10.8947	7.27075			3.9657	2.29975	5.93315	2.41125	10.4392	3.44695	5.61	5.81965	2.1243	1.49675	12.9091	15.4963		7.23485	4.68935	3.67985	2.6116	2.6157	7.7681		5.5894	2.67145	2.8466	3.96755
50	6.36875	4.64675	3.3774	5.18	4.3978	3.5678	5.7859	8.43265	3.563	6.5877	6.7153			7.91315	4.36735	12.1726	3.51245	2.45215	3.1114	8.23045	7.28075	2.1032	2.76635	11.4894	13.5917		11.3741	10.8051	3.338	3.4256	3.88405	9.3085		12.9527	5.3637	5.19935	4.25485
75	2.3795	2.6863	6.2089	7.42625	3.72545	5.0673	8.70965	12.1684	2.95985	9.3163	9.25365			6.37905	3.81465	17.9496	6.3505	6.9727	4.4706	7.2759	4.60715	2.61855	2.9991	7.30245	26.8154		19.4564	14.5846	4.00475	3.6176	4.8172	11.1679		11.2424	10.2597	6.67785	7.10455
100	4.4208	3.2447	4.14605	8.4714	3.29745	3.75805	9.1812	16.5293	4.63395	10.8745	8.4056			9.2505	7.9383	17.5287	10.0525	9.9312	5.5654	6.7647	6.38725	2.9533	5.69025	12.3163	30.1591		22.7676	16.6401	4.8715	3.8362	6.49425	12.5242		10.8295	7.1814	6.53845	7.2106
125	4.9414	4.27485	6.0251	11.3889	4.15315	5.44395	12.7479	13.9818	5.3487	12.2889	7.69705			17.1817	6.41455	18.2883	14.2983	14.8796	9.0079	5.88595	13.3411	2.3775	6.6086	20.1657	19.7209		24.3821	16.8474	6.9285	5.6548	9.03825	11.9407		9.87125	11.112	5.93195	4.40195
150	8.6296	3.14555	10.6724	8.45185	5.76935	6.6224	5.47145	16.5846	7.11505	12.1303	10.3349			13.8162	12.0779	33.3074	13.3209	14.8084	12.4782	8.8372	10.6654	4.96355	4.7125	14.9311				18.3465	10.4578	4.7317	15.0349	14.3436		13.7809	7.78745	9.50695	8.53015

## Sheet: Effort_ Latency to Initiate_Las
N1a.WT	N1a.WT	N1a.WT	N1a.WT	N1a.WT	N1a.WT	N1a.WT	N1a.WT	N1a.WT	N1a.WT	N1a.WT	N1a.WT	N1a.WT	N1a.Het_Fr3 v Fr1	N1a.Het_Fr3 v Fr1	N1a.Het_Fr3 v Fr1	N1a.Het_Fr3 v Fr1	N1a.Het_Fr3 v Fr1	N1a.Het_Fr3 v Fr1	N1a.Het_Fr3 v Fr1	N1a.Het_Fr3 v Fr1	N1a.Het_Fr3 v Fr1	N1a.Het_Fr3 v Fr1	N1a.Het_Fr3 v Fr1	N1a.Het_Fr3 v Fr1	N1a.Het_Fr3 v Fr1	N1a.KO	N1a.KO	N1a.KO	N1a.KO	N1a.KO	N1a.KO	N1a.KO	N1a.KO	N1a.KO	N1a.KO	N1a.KO	N1a.KO	N1a.KO
N1a.363	N1a.364	N1a.367	N1a.40	2N1a.3	65N1a.412N1a	.404N1a.405	N1a.46N1a.3	4N1a.406N1a.6	3N1a.36	N1a.407N1a			.65OA.N	1a.1	N1a.40	8OA.N1a	.3N1a.1	26	1a.411N	1a.102N	1a.147		a.414N	1a.108		OA.N1a.	19	1a.35N	1a.110	N1a.35	3N1a.52N	1a.154N	1a.Dat.	32N1a.5	3N1a.25	1
5.99727	3.55503	6.94785	9.43738	4.40665	5.2748	9.13353	15.6986	5.69923	11.7646	8.81253																23.5749	17.278	7.41927	4.7409	10.1891	12.9361		11.4939	8.69363	7.32578	6.71423

## Sheet: Effort_ Pr(Low Effort) (25 Tria
	N1a.WT_Fr3 v Fr1	N1a.WT_Fr3 v Fr1	N1a.WT_Fr3 v Fr1	N1a.WT_Fr3 v Fr1	N1a.WT_Fr3 v Fr1	N1a.WT_Fr3 v Fr1	N1a.WT_Fr3 v Fr1	N1a.WT_Fr3 v Fr1	N1a.WT_Fr3 v Fr1	N1a.WT_Fr3 v Fr1	N1a.WT_Fr3 v Fr1	N1a.WT_Fr3 v Fr1	N1a.WT_Fr3 v Fr1	N1a.Het_Fr3 v Fr1	N1a.Het_Fr3 v Fr1	N1a.Het_Fr3 v Fr1	N1a.Het_Fr3 v Fr1	N1a.Het_Fr3 v Fr1	N1a.Het_Fr3 v Fr1	N1a.Het_Fr3 v Fr1	N1a.Het_Fr3 v Fr1	N1a.Het_Fr3 v Fr1	N1a.Het_Fr3 v Fr1	N1a.Het_Fr3 v Fr1	N1a.Het_Fr3 v Fr1	N1a.Het_Fr3 v Fr1	N1a.KO_Fr3 v Fr1	N1a.KO_Fr3 v Fr1	N1a.KO_Fr3 v Fr1	N1a.KO_Fr3 v Fr1	N1a.KO_Fr3 v Fr1	N1a.KO_Fr3 v Fr1	N1a.KO_Fr3 v Fr1	N1a.KO_Fr3 v Fr1	N1a.KO_Fr3 v Fr1	N1a.KO_Fr3 v Fr1	N1a.KO_Fr3 v Fr1	N1a.KO_Fr3 v Fr1	N1a.KO_Fr3 v Fr1
	N1a.363	N1a.364	N1a.367	N1a.40	2N1a.3	65N1a.412N1a	.404N1a.405	N1a.46N1a.3	4N1a.406N1a.6	3N1a.36N1a.	407N1a.65OA.N1			a.1	N1a.408	OA.N1a.	3N1a.12	6	a.411N1	a.102N1	a.147	A N1a.	414N1a	.108OA	.N1a.1		9	a.35N1a	.110N1	a.353	A N1a	.52N1a.1	54N1a.D	at.32	A N1a.5	3N1a.25	1
25	0.62	0.7	0.48	0.8	0.54	0.46	0.46	0.36	0.5	0.74	0.66			0.64	0.64	0.46	0.6	0.48	0.54	0.48	0.5	0.48	0.7	0.52	0.5		0.44	0.6	0.34	0.72	0.58	0.6		0.68	0.52	0.44	0.4
50	0.76	0.64	0.5	0.78	0.78	0.48	0.64	0.6	0.7	0.84	0.82			0.76	0.8	0.48	0.7	0.46	0.84	0.66	0.56	0.58	0.66	0.68	0.54		0.56	0.28	0.72	0.58	0.68	0.64		0.62	0.48	0.48	0.88
75	0.72	0.76	0.76	0.84	0.74	0.8	0.74	0.44	0.8	0.78	0.76			0.88	0.82	0.54	0.46	0.4	0.64	0.6	0.78	0.68	0.72	0.9	0.5		0.54	0.56	0.76	0.84	0.6	0.54		0.74	0.5	0.52	0.72
100	0.74	0.78	0.84	0.86	0.94	0.72	0.74	0.46	0.76	0.76	0.9			0.9	0.88	0.74	0.54	0.42	0.78	0.66	0.78	0.66	0.84	0.9	0.48		0.62	0.52	0.62	0.48	0.88	0.72		0.78	0.58	0.46	0.7
125	0.72	0.8	0.86	0.9	0.66	0.8	0.76	0.56	0.8	0.84	0.92			0.8	0.72	0.78	0.66	0.74	0.86	0.68	0.86	0.6	0.66	0.9	1		0.62	0.54	0.64	0.84	0.84	0.64		0.74	0.62	0.6	0.84
150	0.66	0.74	0.96	0.96	0.76	0.82	0.92	0.58	0.86	0.86	0.86			0.9	0.92	0.64	0.66	0.78	0.8	0.86	0.88	0.44	0.76	0.92				0.24	0.86	0.68	0.82	0.7		0.86	0.6	0.68	0.76

## Sheet: Effort_ Pr(Low Effort)_Last75Tr
N1a.WT	N1a.WT	N1a.WT	N1a.WT	N1a.WT	N1a.WT	N1a.WT	N1a.WT	N1a.WT	N1a.WT	N1a.WT	N1a.WT	N1a.WT	N1a.Het_Fr3 v Fr1	N1a.Het_Fr3 v Fr1	N1a.Het_Fr3 v Fr1	N1a.Het_Fr3 v Fr1	N1a.Het_Fr3 v Fr1	N1a.Het_Fr3 v Fr1	N1a.Het_Fr3 v Fr1	N1a.Het_Fr3 v Fr1	N1a.Het_Fr3 v Fr1	N1a.Het_Fr3 v Fr1	N1a.Het_Fr3 v Fr1	N1a.Het_Fr3 v Fr1	N1a.Het_Fr3 v Fr1	N1a.KO	N1a.KO	N1a.KO	N1a.KO	N1a.KO	N1a.KO	N1a.KO	N1a.KO	N1a.KO	N1a.KO	N1a.KO	N1a.KO	N1a.KO
N1a.363	N1a.364	N1a.367	N1a.40	2N1a.3	65N1a.412N1a	.404N1a.405	N1a.46N1a.3	4N1a.406N1a.6	3N1a.36	N1a.407N1a			.65OA.N	1a.1	N1a.40	8OA.N1a	.3N1a.1	26	1a.411N	1a.102N	1a.147		a.414N	1a.108		OA.N1a.	19	1a.35N	1a.110	N1a.35	3N1a.52N	1a.154N	1a.Dat.	32N1a.5	3N1a.25	1
0.706667	0.773333	0.886667	0.906667	0.786667	0.78	0.806667	0.533333	0.806667	0.82	0.89333																0.62	0.433333	0.706667	0.666667	0.846667	0.686667		0.793333	0.6	0.58	0.766667
