# Supplementary material for: Disruption of Nrxn1α within excitatory forebrain circuits drives value-based dysfunction
Source: eLife. 2020 Dec 4;9:e54838. doi: 10.7554/eLife.54838 (PMC7759380; doi:10.7554/eLife.54838)
Supplement: Figure 4—source data 1. [file elife-54838-fig4-data1.xlsx]

## Sheet: QModel_ Alpha
	Wildtype	Wildtype	Wildtype	Wildtype	Wildtype	Wildtype	Wildtype	Wildtype	Wildtype	Wildtype	Wildtype	Wildtype	Wildtype	Knockout	Knockout	Knockout	Knockout	Knockout	Knockout	Knockout	Knockout	Knockout	Knockout	Knockout	Knockout	Knockout
	N1a.363	N1a.363	N1a.34	N1a.36	7N1a.4	02N1a.402N1a	.412N1a.412	N1a.404N1a.	404N1a.46N1a.	46N1a.34N1a	.34N1a.63N1a.6			3N1a.36	N1a.36N	1a.65N1	a.65OA	.N1a.1		1a.1OA.	N1a.3OA	.N1a.3N1a.126		.126N1a.10
0.75	0.994341	0.101046637529993*	0.355788	0.56012	0.634292	0.465384	0.298748	0.543106	0.608826	0.718228	0.490825			0.0138123	0.37227	0.545824	0.735501		0.0904096	0.181833	0.0604781	0.843432	0.434131	0.411192
0.4	0.824865	0.228905	0.223198	0.991934	0.569924	0.666038	0.870634	0.560726	0.495944	0.614855	0.692363			0.0918853	0.182466	0.505993	0.130494		0.0371945	0.157772	0.548229	0.341694	0.939908	0.818638

## Sheet: QModel_ Beta
	Wildtype	Wildtype	Wildtype	Wildtype	Wildtype	Wildtype	Wildtype	Wildtype	Wildtype	Wildtype	Wildtype	Wildtype	Wildtype	Knockout	Knockout	Knockout	Knockout	Knockout	Knockout	Knockout	Knockout	Knockout	Knockout	Knockout	Knockout	Knockout
	N1a.363	N1a.363	N1a.367	N1a.36	7N1a.4	02N1a.402N1a	.412N1a.412	N1a.404N1a.	404N1a.46N1a.	46N1a.34N1a	.34N1a.63N1a.6			3N1a.36	N1a.36N	1a.65N1	a.65OA	.N1a.1		1a.1OA.	N1a.3OA	.N1a.3N1a.126		.126N1a.10
0.75	1.03802	1.71228402112419*	1.28051	0.872354	0.665472	1.43705	1.41269	1.28278	1.11925	1.06969	1.28313			8.57712143182978*	1.01276	1.24636	0.688755		1.53255	1.30805	0.475848	0.909436	1.38548	0.658738
0.4	1.91584	1.64927	1.06593	0.910713	1.33125	1.94885	0.636647	1.53663	1.21574	1.74507	1.33301			1.66713	2.06342	0.897383	1.76618		4.48311	1.74695	1.46631	1.15077	1.45701	0.450423

## Sheet: QModel_ Constant_12v0
	Wildtype	Wildtype	Wildtype	Wildtype	Wildtype	Wildtype	Wildtype	Wildtype	Wildtype	Wildtype	Wildtype	Wildtype	Wildtype	Knockout	Knockout	Knockout	Knockout	Knockout	Knockout	Knockout	Knockout	Knockout	Knockout	Knockout	Knockout	Knockout
	N1a.363	N1a.363	N1a.367	N1a.36	7N1a.4	02N1a.402N1a	.412N1a.412	N1a.404N1a.	404N1a.46N1a.	46N1a.34N1a	.34N1a.63N1a.6			3N1a.36	N1a.36N	1a.65N1	a.65OA	.N1a.1		1a.1OA.	N1a.3OA	.N1a.3N1a.126		.126N1a.10
0.75	0.00327419	0.04064784915021*	0.303054	0.0683693	0.0349249	0.44085	0.153834	0.636484	0.0914614	0.26306	0.0564854			0.934596	0.00197515	0.281447	0.181928		0.232337	0.105984	0.327034	0.416794	0.118311	0.232428
0.4	0.0709589	0.146432	0.212816	0.0843046	0.1434	0.138147	0.135513	0.0958411	0.191401	0.0292939	0.0235238			0.332348	0.0744336	0.519123	0.128817		0.553077	0.0979419	0.152062	0.477687	0.349797	0.218294

## Sheet: QModel_ Constant_12v2
	Wildtype	Wildtype	Wildtype	Wildtype	Wildtype	Wildtype	Wildtype	Wildtype	Wildtype	Wildtype	Wildtype	Wildtype	Wildtype	Knockout	Knockout	Knockout	Knockout	Knockout	Knockout	Knockout	Knockout	Knockout	Knockout	Knockout	Knockout	Knockout
	N1a.363	N1a.363	N1a.367	N1a.36	7N1a.4	02N1a.402N1a	.412N1a.412	N1a.404N1a.	404N1a.46N1a.	46N1a.34N1a	.34N1a.63N1a.6			3N1a.36	N1a.36N	1a.65N1	a.65OA	.N1a.1		1a.1OA.	N1a.3OA	.N1a.3N1a.126		.126N1a.10
0.75	0.263286	0.37588868309731*	0.0808081	0.0417654	0.0160676	0.239301	0.00572452	0.188307	0.156709	0.0911239	0.0268579			0.460054	0.158756	0.0944427	0.0966421		0.0421972	0.00204533	0.0449639	0.297374	0.038819	0.139998
0.4	0.130829	0.00133477	0.412904	0.189409	0.0180147	0.140986	0.138018	0.0387483	0.227789	0.0116752	0.282683			0.00546454	0.167712	0.0707698	0.120342		0.356545	0.285483	0.0657946	0.907824	0.325966	0.235864

## Sheet: QModel_ Constant_12v6
	Wildtype	Wildtype	Wildtype	Wildtype	Wildtype	Wildtype	Wildtype	Wildtype	Wildtype	Wildtype	Wildtype	Wildtype	Wildtype	Knockout	Knockout	Knockout	Knockout	Knockout	Knockout	Knockout	Knockout	Knockout	Knockout	Knockout	Knockout	Knockout
	N1a.363	N1a.363	N1a.367	N1a.36	7N1a.4	02N1a.402N1a	.412N1a.412	N1a.404N1a.	404N1a.46N1a.	46N1a.34N1a	.34N1a.63N1a.6			3N1a.36	N1a.36N	1a.65N1	a.65OA	.N1a.1		1a.1OA.	N1a.3OA	.N1a.3N1a.126		.126N1a.10
0.75	0.0596726	0.0772038432437546*	0.430306	0.0410721	0.178097	0.255167	0.200762	0.567519	0.0991492	0.720693	0.127862			0.653767	0.345105	0.288871	0.151311		0.0405394	0.373548	0.478428	0.885534	0.170074	0.0349303
0.4	0.19892	0.0909994	0.713686	0.196795	0.322543	0.530783	0.0695015	0.0505152	0.197694	0.435175	0.0131304			0.0372007	0.109041	0.363693	0.125303		0.181913	0.00244197	0.0540006	1.24089	0.660812	0.438589

## Sheet: QModel_ Constant_12v8
	Wildtype	Wildtype	Wildtype	Wildtype	Wildtype	Wildtype	Wildtype	Wildtype	Wildtype	Wildtype	Wildtype	Wildtype	Wildtype	Knockout	Knockout	Knockout	Knockout	Knockout	Knockout	Knockout	Knockout	Knockout	Knockout	Knockout	Knockout	Knockout
	N1a.363	N1a.363	N1a.367	N1a.36	7N1a.4	02N1a.402N1a	.412N1a.412	N1a.404N1a.	404N1a.46N1a.	46N1a.34N1a	.34N1a.63N1a.6			3N1a.36	N1a.36N	1a.65N1	a.65OA	.N1a.1		1a.1OA.	N1a.3OA	.N1a.3N1a.126		.126N1a.10
0.75	0.257415	0.101265875236525*	1.0026	0.17268	0.253717	0.0958208	0.404603	0.185867	0.280588	0.678718	1.10642			0.352964	0.271323	1.05172	0.586764		0.155635	0.148246	0.0660007	1.27847	0.299724	0.50797
0.4	0.492071	0.479184	0.64378	0.320069	0.195129	0.0288602	0.401446	0.814558	0.482587	0.483757	0.23338			0.59808	0.295054	0.608078	0.0517337		0.102134	0.106768	0.0865485	0.953559	0.387041	0.0372359

## Sheet: QModel_ Gamma
	Wildtype	Wildtype	Wildtype	Wildtype	Wildtype	Wildtype	Wildtype	Wildtype	Wildtype	Wildtype	Wildtype	Wildtype	Wildtype	Knockout	Knockout	Knockout	Knockout	Knockout	Knockout	Knockout	Knockout	Knockout	Knockout	Knockout	Knockout	Knockout
	N1a.363	N1a.363	N1a.367	N1a.36	7N1a.4	02N1a.402N1a	.412N1a.412	N1a.404N1a.	404N1a.46N1a.	46N1a.34N1a	.34N1a.63N1a.6			3N1a.36	N1a.36N	1a.65N1	a.65OA	.N1a.1		1a.1OA.	N1a.3OA	.N1a.3N1a.126		.126N1a.10
0.75	2	0.814664330466045*	2	2	2	1.59398	1.05438	1.59615	2	1.84237	2			0.499826	1.46921	1.897	1.16749		1.15483e-08	0.887454	2	2	0.922264	2
0.4	2	1.35301	1.49251	2	0.678886	1.79888	2	2	1.2558	1.73804	0.866202			0.357154	1.03556	1.59816e-11	0.697687		2	2	1.80615	0.696843	1.92101	2

## Sheet: QModel_ Kappa
	Wildtype	Wildtype	Wildtype	Wildtype	Wildtype	Wildtype	Wildtype	Wildtype	Wildtype	Wildtype	Wildtype	Wildtype	Wildtype	Knockout	Knockout	Knockout	Knockout	Knockout	Knockout	Knockout	Knockout	Knockout	Knockout	Knockout	Knockout	Knockout
	N1a.363	N1a.363	N1a.367	N1a.36	7N1a.4	02N1a.402N1a	.412N1a.412	N1a.404N1a.	404N1a.46N1a.	46N1a.34N1a	.34N1a.63N1a.6			3N1a.36	N1a.36N	1a.65N1	a.65OA	.N1a.1		1a.1OA.	N1a.3OA	.N1a.3N1a.126		.126N1a.10
0.75	0.63244	0.0366057008502705*	0.153896	0.447666	0.491451	0.581789	0.400683	0.453595	0.28167	0.595575	0.262494			0.25178	0.480543	0.38086	0.310754		0.368945	0.221098	0.3866	0.762298	0.603822	0.365514
0.4	0.419851	-0.0628947	0.101833	0.14612	0.0533598	0.433794	0.505165	0.442572	0.245266	0.408292	0.304788			0.148052	0.319789	0.424531	0.316897		0.213712	0.16429	0.504372	0.528747	0.330604	0.535333
