# Supplementary material for: Disruption of Nrxn1α within excitatory forebrain circuits drives value-based dysfunction
Source: eLife. 2020 Dec 4;9:e54838. doi: 10.7554/eLife.54838 (PMC7759380; doi:10.7554/eLife.54838)
Supplement: Figure 5—source data 1. [file elife-54838-fig5-data1.xlsx]

## Sheet: Adaptability_Aggregate
	N1C_Homo_Nex(-) Pr(Reward) = .75	N1C_Homo_Nex(-) Pr(Reward) = .75	N1C_Homo_Nex(-) Pr(Reward) = .75	N1C_Homo_Nex(-) Pr(Reward) = .75	N1C_Homo_Nex(-) Pr(Reward) = .75	N1C_Homo_Nex(-) Pr(Reward) = .75	N1C_Homo_Nex(-) Pr(Reward) = .75	N1C_Homo_Nex(-) Pr(Reward) = .75	N1C_Homo_Nex(-) Pr(Reward) = .75	N1C_Homo_Nex(-) Pr(Reward) = .75	N1C_Homo_Nex(-) Pr(Reward) = .75	N1C_Homo_Nex(-) Pr(Reward) = .75	N1C_Homo_Nex(-) Pr(Reward) = .75	N1C_Homo_Nex(-) Pr(Reward) = .75	N1C_Homo_Nex(-) Pr(Reward) = .4	N1C_Homo_Nex(-) Pr(Reward) = .4	N1C_Homo_Nex(-) Pr(Reward) = .4	N1C_Homo_Nex(-) Pr(Reward) = .4	N1C_Homo_Nex(-) Pr(Reward) = .4	N1C_Homo_Nex(-) Pr(Reward) = .4	N1C_Homo_Nex(-) Pr(Reward) = .4	N1C_Homo_Nex(-) Pr(Reward) = .4	N1C_Homo_Nex(-) Pr(Reward) = .4	N1C_Homo_Nex(-) Pr(Reward) = .4	N1C_Homo_Nex(-) Pr(Reward) = .4	N1C_Homo_Nex(-) Pr(Reward) = .4	N1C_Homo_Nex(-) Pr(Reward) = .4	N1C_Homo_Nex(-) Pr(Reward) = .4	N1C_Homo_Nex(+) Pr(Reward) = .75	N1C_Homo_Nex(+) Pr(Reward) = .75	N1C_Homo_Nex(+) Pr(Reward) = .75	N1C_Homo_Nex(+) Pr(Reward) = .75	N1C_Homo_Nex(+) Pr(Reward) = .75	N1C_Homo_Nex(+) Pr(Reward) = .75	N1C_Homo_Nex(+) Pr(Reward) = .75	N1C_Homo_Nex(+) Pr(Reward) = .75	N1C_Homo_Nex(+) Pr(Reward) = .75	N1C_Homo_Nex(+) Pr(Reward) = .75	N1C_Homo_Nex(+) Pr(Reward) = .75	N1C_Homo_Nex(+) Pr(Reward) = .75	N1C_Homo_Nex(+) Pr(Reward) = .75	N1C_Homo_Nex(+) Pr(Reward) = .75	N1C_Homo_Nex(+) Pr(Reward) = .4	N1C_Homo_Nex(+) Pr(Reward) = .4	N1C_Homo_Nex(+) Pr(Reward) = .4	N1C_Homo_Nex(+) Pr(Reward) = .4	N1C_Homo_Nex(+) Pr(Reward) = .4	N1C_Homo_Nex(+) Pr(Reward) = .4	N1C_Homo_Nex(+) Pr(Reward) = .4
	59	29	214	159	122	211	587	279	104	511	582			78	91	45	114	278	191	323	114	203	101	323			11	590	310	125	611	590	411	125	611	440	411	142	811	44	51	314	281	146	51	312	571	146	571
12μL vs 0 μL	0.5455	0.4889	0.88	0.7455	0.825	0.6	0.7	0.4	0.52	0.8133	0.7714	0.7571	0.8526	0.95	0.5889	0.6154	0.6364	0.64	0.7	0.5091	0.3111	0.5556	0.6	0.5818	0.7158	0.6286	0.7217	0.6778	0.98	0.5111	0.72	0.6308	0.6571	0.8588	0.6118	0.35	0.8091	0.8267	0.9231	0.6118	0.6824		0.6727	0.6	0.3273	0.3778	0.6364	0.3	0.4933
12μL vs 2 μL	0.54	0.4286	0.925	0.6545	0.8364	0.6		0.56	0.6333	0.8	0.5538	0.6727	0.9125	0.9545	0.7818	0.4286	0.6333	0.5091	0.6571	0.74	0.425	0.4	0.5818	0.58	0.6375	0.325	0.5647	0.7467	0.3714	0.6	0.4444	0.48	0.4	0.6824	0.6	0.68	0.8	0.65	0.8667	0.58	0.6889		0.7692	0.4	0.5667	0.3714	0.5714	0.5556	0.8429
12μL vs 6 μL	0.2667	0.8	0.68	0.3333	0.3	0.575	0.56	0.5333	0.6667	0.7333	0.65	0.7833	0.6	0.6353	0.7	0.4667	0.58	0.625	0.5333	0.5333	0.44	0.3	0.675	0.56	0.76	0.6667	0.5833	0.55	0.6571	0.7	0.6857	0.5	0.85	0.5	0.8	0.4	0.68	0.8	-0.05	0.0667	0.5778		0.6571	0.4857	0.4667	0.2	0.4667	0.65	0.6667
12μL vs 8μL	0.4	0.5	0.1667	0.6333	0.4667	0.5333	0.0667	0.5	0.5333	0.4909	0.6667	0.8571	0.72	0.4889	0.6	0.4	0.1	0.3333	0.2	-2.78e-17	0.5429	0.48	0.52	0.6857	0.7	0.44	0.3	0.675	0.55	0.72	0.4	0.6667	0.6857	0.5429	0.9143	0.5	0.6667	1.2	0.4	0.425	0.64		0.1	0.7333	0	0.35	0.2	0.5	0.2
[truncated: 35 more columns]

## Sheet: LatChoi_Aggregate
	N1C_Homo_Nex(-) Pr(Reward) = .75	N1C_Homo_Nex(-) Pr(Reward) = .75	N1C_Homo_Nex(-) Pr(Reward) = .75	N1C_Homo_Nex(-) Pr(Reward) = .75	N1C_Homo_Nex(-) Pr(Reward) = .75	N1C_Homo_Nex(-) Pr(Reward) = .75	N1C_Homo_Nex(-) Pr(Reward) = .75	N1C_Homo_Nex(-) Pr(Reward) = .75	N1C_Homo_Nex(-) Pr(Reward) = .75	N1C_Homo_Nex(-) Pr(Reward) = .75	N1C_Homo_Nex(-) Pr(Reward) = .75	N1C_Homo_Nex(-) Pr(Reward) = .75	N1C_Homo_Nex(-) Pr(Reward) = .75	N1C_Homo_Nex(-) Pr(Reward) = .75	N1C_Homo_Nex(-) Pr(Reward) = .4	N1C_Homo_Nex(-) Pr(Reward) = .4	N1C_Homo_Nex(-) Pr(Reward) = .4	N1C_Homo_Nex(-) Pr(Reward) = .4	N1C_Homo_Nex(-) Pr(Reward) = .4	N1C_Homo_Nex(-) Pr(Reward) = .4	N1C_Homo_Nex(-) Pr(Reward) = .4	N1C_Homo_Nex(-) Pr(Reward) = .4	N1C_Homo_Nex(-) Pr(Reward) = .4	N1C_Homo_Nex(-) Pr(Reward) = .4	N1C_Homo_Nex(-) Pr(Reward) = .4	N1C_Homo_Nex(-) Pr(Reward) = .4	N1C_Homo_Nex(-) Pr(Reward) = .4	N1C_Homo_Nex(-) Pr(Reward) = .4	N1C_Homo_Nex(+) Pr(Reward) = .75	N1C_Homo_Nex(+) Pr(Reward) = .75	N1C_Homo_Nex(+) Pr(Reward) = .75	N1C_Homo_Nex(+) Pr(Reward) = .75	N1C_Homo_Nex(+) Pr(Reward) = .75	N1C_Homo_Nex(+) Pr(Reward) = .75	N1C_Homo_Nex(+) Pr(Reward) = .75	N1C_Homo_Nex(+) Pr(Reward) = .75	N1C_Homo_Nex(+) Pr(Reward) = .75	N1C_Homo_Nex(+) Pr(Reward) = .75	N1C_Homo_Nex(+) Pr(Reward) = .75	N1C_Homo_Nex(+) Pr(Reward) = .75	N1C_Homo_Nex(+) Pr(Reward) = .75	N1C_Homo_Nex(+) Pr(Reward) = .75	N1C_Homo_Nex(+) Pr(Reward) = .4	N1C_Homo_Nex(+) Pr(Reward) = .4	N1C_Homo_Nex(+) Pr(Reward) = .4	N1C_Homo_Nex(+) Pr(Reward) = .4	N1C_Homo_Nex(+) Pr(Reward) = .4	N1C_Homo_Nex(+) Pr(Reward) = .4	N1C_Homo_Nex(+) Pr(Reward) = .4
	59	29	214	159	122	211	587	279	104	511	582			78	78	91	45	114	278	191	323	114	203	101	323			11	11	590	310	125	611	590	411	125	611	440	411	142	811	44	44	51	314	281	146	51	312
12μL vs 0 μL	0.2564	0.3332	0.2913	0.2683	0.2478	0.26	0.3224	0.2425	0.2496	0.3074	0.2462	0.3152	0.2399	0.3096	0.2454	0.29	0.2601	0.2454	0.2418	0.2749	0.2665	0.2477	0.2241	0.2433	0.2492	0.2863	0.2614	0.2709	0.4265	0.261	0.3233	0.3062	0.3534	0.3287	0.2905	0.3005	0.3542	0.3469	0.3673	0.3144	0.4349		0.3155	0.2414	0.2677	0.2716	0.3161	0.2978	0.2924
12μL vs 2 μL	0.2445	0.2561	0.3459	0.2578	0.2503	0.2598		0.2533	0.2767	0.2871	0.2426	0.3046	0.2536	0.2857	0.261	0.2856	0.2579	0.2542	0.2353	0.2391	0.2593	0.2207	0.2448	0.2622	0.2331	0.2715	0.2457	0.2747	0.3313	0.2882	0.2577	0.3739	0.3349	0.294	0.2866	0.2744	0.3235	0.3027	0.3165	0.2866	0.3611		0.3402	0.2402	0.2627	0.2658	0.3012	0.2816	0.3089
12μL vs 6 μL	0.246	0.2884	0.3702	0.2441	0.2463	0.2505	0.3015	0.2809	0.2412	0.2979	0.2349	0.2817	0.2422	0.3067	0.2577	0.3003	0.2954	0.2608	0.226	0.2417	0.2616	0.2225	0.2186	0.2281	0.235	0.2843	0.2603	0.2995	0.3625	0.2554	0.3313	0.3017	0.319	0.3011	0.2844	0.2722	0.3062	0.3096	0.3367	0.3026	0.3401		0.3085	0.2747	0.2594	0.277	0.2919	0.294	0.2901
12μL vs 8μL	0.2659	0.2669	0.2992	0.2487	0.2463	0.2549	0.2691	0.2266	0.2262	0.2902	0.2371	0.3429	0.2561	0.2644	0.2374	0.2322	0.2619	0.2311	0.2423	0.243	0.2623	0.2377	0.2126	0.2654	0.2508	0.2593	0.2663	0.2505	0.3881	0.2585	0.248	0.3196	0.3919	0.3059	0.3081	0.28	0.3237	0.3328	0.3476	0.2924	0.34		0.32	0.2486	0.259	0.2704	0.3295	0.2788	0.3344
[truncated: 35 more columns]

## Sheet: LatInit_Aggregate
	N1C_Homo_Nex(-) Pr(Reward) = .75	N1C_Homo_Nex(-) Pr(Reward) = .75	N1C_Homo_Nex(-) Pr(Reward) = .75	N1C_Homo_Nex(-) Pr(Reward) = .75	N1C_Homo_Nex(-) Pr(Reward) = .75	N1C_Homo_Nex(-) Pr(Reward) = .75	N1C_Homo_Nex(-) Pr(Reward) = .75	N1C_Homo_Nex(-) Pr(Reward) = .75	N1C_Homo_Nex(-) Pr(Reward) = .75	N1C_Homo_Nex(-) Pr(Reward) = .75	N1C_Homo_Nex(-) Pr(Reward) = .75	N1C_Homo_Nex(-) Pr(Reward) = .75	N1C_Homo_Nex(-) Pr(Reward) = .75	N1C_Homo_Nex(-) Pr(Reward) = .75	N1C_Homo_Nex(-) Pr(Reward) = .4	N1C_Homo_Nex(-) Pr(Reward) = .4	N1C_Homo_Nex(-) Pr(Reward) = .4	N1C_Homo_Nex(-) Pr(Reward) = .4	N1C_Homo_Nex(-) Pr(Reward) = .4	N1C_Homo_Nex(-) Pr(Reward) = .4	N1C_Homo_Nex(-) Pr(Reward) = .4	N1C_Homo_Nex(-) Pr(Reward) = .4	N1C_Homo_Nex(-) Pr(Reward) = .4	N1C_Homo_Nex(-) Pr(Reward) = .4	N1C_Homo_Nex(-) Pr(Reward) = .4	N1C_Homo_Nex(-) Pr(Reward) = .4	N1C_Homo_Nex(-) Pr(Reward) = .4	N1C_Homo_Nex(-) Pr(Reward) = .4	N1C_Homo_Nex(+) Pr(Reward) = .75	N1C_Homo_Nex(+) Pr(Reward) = .75	N1C_Homo_Nex(+) Pr(Reward) = .75	N1C_Homo_Nex(+) Pr(Reward) = .75	N1C_Homo_Nex(+) Pr(Reward) = .75	N1C_Homo_Nex(+) Pr(Reward) = .75	N1C_Homo_Nex(+) Pr(Reward) = .75	N1C_Homo_Nex(+) Pr(Reward) = .75	N1C_Homo_Nex(+) Pr(Reward) = .75	N1C_Homo_Nex(+) Pr(Reward) = .75	N1C_Homo_Nex(+) Pr(Reward) = .75	N1C_Homo_Nex(+) Pr(Reward) = .75	N1C_Homo_Nex(+) Pr(Reward) = .75	N1C_Homo_Nex(+) Pr(Reward) = .75	N1C_Homo_Nex(+) Pr(Reward) = .4	N1C_Homo_Nex(+) Pr(Reward) = .4	N1C_Homo_Nex(+) Pr(Reward) = .4	N1C_Homo_Nex(+) Pr(Reward) = .4	N1C_Homo_Nex(+) Pr(Reward) = .4	N1C_Homo_Nex(+) Pr(Reward) = .4	N1C_Homo_Nex(+) Pr(Reward) = .4
	59	29	214	159	122	211	587	279	104	511	582			78	91	45	114	278	191	323	114	203	101	323			11	590	310	125	611	590	411	125	611	440	411	142	811	44	51	314	281	146	51	312	571	146	571
12μL vs 0 μL	6.8979	13.4315	9.3793	11.5012	12.5887	6.6495	9.3659	11.2586	10.4457	8.5219	5.0554	8.8223	4.0538	4.4247	4.1285	5.9167	9.9101	11.0059	5.9032	6.5747	8.4107	6.5317	4.8484	6.3635	3.4361	7.4449	3.2387	3.7708	10.1413	8.6917	7.9396	8.0824	13.5486	5.0196	5.1689	6.6303	5.4371	10.8493	8.5651	6.8816	6.724		6.593	6.0054	4.2167	5.1515	6.0093	3.2199	2.3488
12μL vs 2 μL	6.1288	9.7847	13.5555	8.9354	12.1231	9.4473		12.1408	7.2705	10.2449	6.3348	9.6725	3.1474	3.2749	7.6417	8.1469	6.3827	9.8652	7.0057	7.7027	6.2555	7.7461	4.2803	5.2742	3.4102	10.2045	2.95	5.4421	8.1629	10.883	7.6174	10.3027	12.2305	5.2892	4.8068	12.7711	6.7951	12.9435	9.4629	7.4858	7.5055		5.9475	6.5958	4.8597	5.4071	5.5053	3.8283	2.4494
12μL vs 6 μL	9.4463	10.7967	12.5734	9.0622	8.9142	9.0776	9.6957	13.8893	8.2058	9.9033	5.1105	7.5657	3.9432	4.8831	5.3222	7.0395	9.5729	8.115	8.7997	6.4063	7.3034	9.3605	4.5569	5.6488	4.5642	5.8473	2.1124	4.453	18.2269	12.9725	11.8815	8.357	12.5073	7.2473	7.2288	7.4585	6.8787	12.9204	7.3804	9.9187	7.9567		5.2251	10.8097	5.284	4.8269	6.2509	4.6192	3.1881
12μL vs 8μL	7.6659	14.0135	12.2109	8.2846	12.0823	9.9366	13.3727	14.0238	7.2175	9.9961	6.0957	16.3043	7.4548	6.0521	4.1899	6.257	9.8669	14.3357	5.2895	6.3505	5.3696	9.0325	4.7802	7.9379	3.1904	5.0547	1.5871	4.7697	16.618	14.4003	6.5806	12.135	19.4313	6.6464	8.8424	13.2448	7.8783	15.4371	9.3459	6.8465	6.5954		5.7316	9.8025	5.2366	6.2627	11.2199	2.3199	6.8907
[truncated: 35 more columns]

## Sheet: LoseSwitch_Aggregate
	N1C_Homo_Nex(-) Pr(Reward) = .75	N1C_Homo_Nex(-) Pr(Reward) = .75	N1C_Homo_Nex(-) Pr(Reward) = .75	N1C_Homo_Nex(-) Pr(Reward) = .75	N1C_Homo_Nex(-) Pr(Reward) = .75	N1C_Homo_Nex(-) Pr(Reward) = .75	N1C_Homo_Nex(-) Pr(Reward) = .75	N1C_Homo_Nex(-) Pr(Reward) = .75	N1C_Homo_Nex(-) Pr(Reward) = .75	N1C_Homo_Nex(-) Pr(Reward) = .75	N1C_Homo_Nex(-) Pr(Reward) = .75	N1C_Homo_Nex(-) Pr(Reward) = .75	N1C_Homo_Nex(-) Pr(Reward) = .75	N1C_Homo_Nex(-) Pr(Reward) = .75	N1C_Homo_Nex(-) Pr(Reward) = .4	N1C_Homo_Nex(-) Pr(Reward) = .4	N1C_Homo_Nex(-) Pr(Reward) = .4	N1C_Homo_Nex(-) Pr(Reward) = .4	N1C_Homo_Nex(-) Pr(Reward) = .4	N1C_Homo_Nex(-) Pr(Reward) = .4	N1C_Homo_Nex(-) Pr(Reward) = .4	N1C_Homo_Nex(-) Pr(Reward) = .4	N1C_Homo_Nex(-) Pr(Reward) = .4	N1C_Homo_Nex(-) Pr(Reward) = .4	N1C_Homo_Nex(-) Pr(Reward) = .4	N1C_Homo_Nex(-) Pr(Reward) = .4	N1C_Homo_Nex(-) Pr(Reward) = .4	N1C_Homo_Nex(-) Pr(Reward) = .4	N1C_Homo_Nex(+) Pr(Reward) = .75	N1C_Homo_Nex(+) Pr(Reward) = .75	N1C_Homo_Nex(+) Pr(Reward) = .75	N1C_Homo_Nex(+) Pr(Reward) = .75	N1C_Homo_Nex(+) Pr(Reward) = .75	N1C_Homo_Nex(+) Pr(Reward) = .75	N1C_Homo_Nex(+) Pr(Reward) = .75	N1C_Homo_Nex(+) Pr(Reward) = .75	N1C_Homo_Nex(+) Pr(Reward) = .75	N1C_Homo_Nex(+) Pr(Reward) = .75	N1C_Homo_Nex(+) Pr(Reward) = .75	N1C_Homo_Nex(+) Pr(Reward) = .75	N1C_Homo_Nex(+) Pr(Reward) = .75	N1C_Homo_Nex(+) Pr(Reward) = .75	N1C_Homo_Nex(+) Pr(Reward) = .4	N1C_Homo_Nex(+) Pr(Reward) = .4	N1C_Homo_Nex(+) Pr(Reward) = .4	N1C_Homo_Nex(+) Pr(Reward) = .4	N1C_Homo_Nex(+) Pr(Reward) = .4	N1C_Homo_Nex(+) Pr(Reward) = .4	N1C_Homo_Nex(+) Pr(Reward) = .4
	59	29	214	159	122	211	587	279	104	511	582			78	91	45	114	278	191	323	114	203	101	323			11	590	310	125	611	590	411	125	611	440	411	142	811	44	51	314	281	146	51	312	571	146	571
12μL vs 0 μL	0.5658	0.3778	0.4915	0.3654	0.6222	0.4615	0.5246	0.5439	0.4737	0.4714	0.4444	0.5075	0.4375	0.381	0.3799	0.5319	0.4	0.4532	0.3858	0.3883	0.4395	0.4948	0.4803	0.4678	0.471	0.4581	0.4125	0.4618	0.38	0.4853	0.4	0.4179	0.4348	0.5165	0.5139	0.4324	0.5278	0.449	0.5091	0.4487	0.4026		0.5172	0.4427	0.3933	0.4817	0.5049	0.5177	0.5019
12μL vs 2 μL	0.5238	0.4746	0.375	0.5	0.4565	0.4754		0.4348	0.5135	0.4259	0.4819	0.4571	0.473	0.4429	0.4353	0.5031	0.4066	0.4615	0.4456	0.4398	0.4754	0.459	0.4979	0.5266	0.4696	0.4604	0.4556	0.4911	0.4	0.3725	0.5769	0.4634	0.4717	0.4167	0.6265	0.4792	0.4878	0.5	0.3934	0.4571	0.4658		0.4691	0.4111	0.4087	0.3935	0.4577	0.518	0.5
12μL vs 6 μL	0.5625	0.551	0.4898	0.4085	0.6094	0.4394	0.6029	0.5455	0.4286	0.4706	0.4528	0.5167	0.4639	0.3889	0.3439	0.4912	0.4685	0.4793	0.4685	0.4918	0.5385	0.4823	0.5316	0.5291	0.4937	0.4769	0.4966	0.5569	0.5588	0.4792	0.4651	0.4	0.5185	0.5606	0.5658	0.4211	0.4833	0.5536	0.5	0.4909	0.4138		0.4879	0.431	0.4093	0.3271	0.375	0.5211	0.38
12μL vs 8μL	0.4167	0.5686	0.5172	0.4265	0.4259	0.4706	0.48	0.3684	0.5352	0.4262	0.5349	0.3611	0.3881	0.5441	0.4578	0.5821	0.3862	0.5124	0.4229	0.4011	0.5185	0.4497	0.4627	0.4395	0.4961	0.455	0.4754	0.5349	0.46	0.5333	0.4138	0.5	0.625	0.4024	0.4462	0.4898	0.4444	0.5294	0.56	0.45	0.4375		0.4231	0.3986	0.3864	0.5138	0.4732	0.4533	0.561
[truncated: 35 more columns]

## Sheet: Nex_ Latency to Choice (25 Tria
	Nex-/-N1cc/c	Nex-/-N1cc/c	Nex-/-N1cc/c	Nex-/-N1cc/c	Nex-/-N1cc/c	Nex-/-N1cc/c	Nex-/-N1cc/c	Nex-/-N1cc/c	Nex-/-N1cc/c	Nex-/-N1cc/c	Nex-/-N1cc/c	Nex-/-N1cc/c	Nex-/-N1cc/c	Nex+/-N1cc/c	Nex+/-N1cc/c	Nex+/-N1cc/c	Nex+/-N1cc/c	Nex+/-N1cc/c	Nex+/-N1cc/c	Nex+/-N1cc/c	Nex+/-N1cc/c	Nex+/-N1cc/c	Nex+/-N1cc/c	Nex+/-N1cc/c	Nex+/-N1cc/c	Nex+/-N1cc/c	Nex+/-N1cwt/wt	Nex+/-N1cwt/wt	Nex+/-N1cwt/wt	Nex+/-N1cwt/wt	Nex+/-N1cwt/wt	Nex+/-N1cwt/wt	Nex+/-N1cwt/wt	Nex+/-N1cwt/wt	Nex+/-N1cwt/wt	Nex+/-N1cwt/wt	Nex+/-N1cwt/wt	Nex+/-N1cwt/wt	Nex+/-N1cwt/wt
	N1a.363	N1a.364	N1a.367	N1a.40	2N1a.3	65N1a.41	2N1a.40	4N1a.40	5N1a.46N1a.34	N1a.406	N1a.63N1a.			36N1a.4	07N1a.6	5OA.N1a	.1N1a.4	08OA.N1	a.3N1a.	126N1a.	411N1a.	102N1a	.147N1	a.414N	1a.108		OA.N1a.	19	1a.35N	1a.110	N1a.35	3N1a.52N	1a.154N	1a.Dat.	32N1a.5	3N1a.25	1
25	0.3089	0.3012	0.2745	0.2755	0.2388	0.27015	0.36745	0.24645	0.29035	0.33725	0.27595			0.2973	0.30455	0.26605	0.36325	0.30975	0.3023	0.323	0.26115	0.2808	0.32455	0.3311	0.2698	0.37475	0.2944	0.31745	0.29045	0.3448	0.234	0.3014	0.2639	0.22585	0.27425	0.3408	0.2671	0.2648
50	0.232	0.29215	0.2682	0.25475	0.214	0.23985	0.2807	0.22005	0.2884	0.2673	0.2874			0.30655	0.27165	0.27345	0.36585	0.3248	0.31815	0.3021	0.24335	0.3184	0.3111	0.31075	0.2992	0.3711	0.27785	0.30855	0.31465	0.3275	0.2524	0.2485	0.27165	0.20445	0.28055	0.26545	0.31065	0.2223
75	0.23385	0.33935	0.2598	0.24115	0.2057	0.2352	0.27945	0.211	0.25505	0.25595	0.24835			0.33845	0.25785	0.2969	0.35495	0.35155	0.30825	0.30885	0.25625	0.318	0.307	0.35105	0.28845	0.3346	0.2876	0.3084	0.3044	0.3367	0.2692	0.2438	0.2269	0.19295	0.2447	0.3364	0.2465	0.2194
100	0.2358	0.3894	0.2738	0.2286	0.19975	0.23325	0.25955	0.21315	0.2272	0.2666	0.2928			0.373	0.25685	0.30085	0.36245	0.38225	0.31185	0.3105	0.2566	0.3381	0.33185	0.39025	0.29355	0.3106	0.3093	0.2715	0.3084	0.321	0.2555	0.2529	0.22575	0.2015	0.2562	0.2741	0.2365	0.2845
125	0.2261	0.3232	0.4228	0.2353	0.2033	0.23195	0.2457	0.2297	0.21285	0.26265	0.2638			0.3557	0.3477	0.25115	0.353	0.4135	0.3103	0.2966	0.34095	0.3201	0.3051	0.32415	0.29675	0.30335	0.2985	0.26635	0.27665	0.315		0.2255	0.25665	0.224	0.27035	0.27755	0.2659	0.2061
150	0.2793	0.4692	0.2959	0.2221	0.1997	0.22315	0.2654		0.22165	0.23845	0.31705			0.39845	0.2638	0.2541	0.36015		0.33065	0.3145	0.25735	0.3403	0.2896	0.32905	0.30495	0.30945		0.2536	0.291	0.2769		0.2518	0.26865	0.19165	0.3254	0.30285	0.2601	0.2497

## Sheet: Nex_ Latency to Choice_AvgLast7
	Nex-/-N1cc/c	Nex-/-N1cc/c	Nex-/-N1cc/c	Nex-/-N1cc/c	Nex-/-N1cc/c	Nex-/-N1cc/c	Nex-/-N1cc/c	Nex-/-N1cc/c	Nex-/-N1cc/c	Nex-/-N1cc/c	Nex-/-N1cc/c	Nex-/-N1cc/c	Nex-/-N1cc/c	Nex+/-N1cc/c	Nex+/-N1cc/c	Nex+/-N1cc/c	Nex+/-N1cc/c	Nex+/-N1cc/c	Nex+/-N1cc/c	Nex+/-N1cc/c	Nex+/-N1cc/c	Nex+/-N1cc/c	Nex+/-N1cc/c	Nex+/-N1cc/c	Nex+/-N1cc/c	Nex+/-N1cc/c	Nex+/-N1cwt/wt	Nex+/-N1cwt/wt	Nex+/-N1cwt/wt	Nex+/-N1cwt/wt	Nex+/-N1cwt/wt	Nex+/-N1cwt/wt	Nex+/-N1cwt/wt	Nex+/-N1cwt/wt	Nex+/-N1cwt/wt	Nex+/-N1cwt/wt	Nex+/-N1cwt/wt	Nex+/-N1cwt/wt	Nex+/-N1cwt/wt
	N1a.363	N1a.364	N1a.367	N1a.40	2N1a.3	65N1a.412N1a	.404N1a.405	N1a.46N1a.3	4N1a.406N1a.6	3N1a.36	N1a.407N1a			.65OA.N	1a.1	N1a.40	8OA.N1a	.3N1a.1	26	1a.411N	1a.102N	1a.147		a.414N	1a.108		OA.N1a.	19	1a.35N	1a.110	N1a.35	3N1a.52N	1a.154N	1a.Dat.	32N1a.5	3N1a.25	1
FR3 v FR1	0.247067	0.393933	0.330833	0.228667	0.200917	0.22945	0.256883	0.221425	0.220567	0.2559	0.291217			0.375717	0.28945	0.2687	0.358533	0.397875	0.3176	0.3072	0.284967	0.332833	0.30885	0.347817	0.298417	0.3078	0.3039	0.263817	0.292017	0.3043	0.2555	0.2434	0.25035	0.205717	0.283983	0.284833	0.254167	0.246767

## Sheet: Nex_ Latency to Initiate (25 Tr
	Nex-/-N1cc/c	Nex-/-N1cc/c	Nex-/-N1cc/c	Nex-/-N1cc/c	Nex-/-N1cc/c	Nex-/-N1cc/c	Nex-/-N1cc/c	Nex-/-N1cc/c	Nex-/-N1cc/c	Nex-/-N1cc/c	Nex-/-N1cc/c	Nex-/-N1cc/c	Nex-/-N1cc/c	Nex+/-N1cc/c	Nex+/-N1cc/c	Nex+/-N1cc/c	Nex+/-N1cc/c	Nex+/-N1cc/c	Nex+/-N1cc/c	Nex+/-N1cc/c	Nex+/-N1cc/c	Nex+/-N1cc/c	Nex+/-N1cc/c	Nex+/-N1cc/c	Nex+/-N1cc/c	Nex+/-N1cc/c	Nex+/-N1cwt/wt	Nex+/-N1cwt/wt	Nex+/-N1cwt/wt	Nex+/-N1cwt/wt	Nex+/-N1cwt/wt	Nex+/-N1cwt/wt	Nex+/-N1cwt/wt	Nex+/-N1cwt/wt	Nex+/-N1cwt/wt	Nex+/-N1cwt/wt	Nex+/-N1cwt/wt	Nex+/-N1cwt/wt	Nex+/-N1cwt/wt
	N1a.363	N1a.364	N1a.367	N1a.40	2N1a.3	65N1a.41	2N1a.40	4N1a.40	5N1a.46N1a.34	N1a.406	N1a.63N1a.			36N1a.4	07N1a.6	5OA.N1a	.1N1a.4	08OA.N1	a.3N1a.	126N1a.	411N1a.	102N1a	.147N1	a.414N	1a.108		OA.N1a.	19	1a.35N	1a.110	N1a.35	3N1a.52N	1a.154N	1a.Dat.	32N1a.5	3N1a.25	1
25	2.57185	7.40095	8.2029	3.64805	6.1475	4.2845	5.08945	6.22805	4.69115	4.8912	1.94445			5.4794	3.91315	3.71245	3.61845	10.61	3.9546	4.9914	5.28465	2.82	2.26385	3.60555	3.6633	4.19505	5.1325	6.2766	4.59425	3.08655	7.66795	6.23615	5.3988	3.8616	4.29455	6.3495	3.11455	3.85635
50	4.662	12.5795	6.4784	5.3572	8.87445	4.9835	4.85455	9.9673	4.7514	8.3996	2.89145			3.3096	3.98065	4.12695	4.49445	18.6946	6.12605	6.7338	5.6732	3.95315	3.06705	3.8681	3.76095	4.61185	10.9669	7.77095	6.1719	1.5753	14.9576	4.57405	6.0946	4.14865	4.0508	5.8209	4.6665	3.79815
75	6.23175	17.6089	16.6173	10.1868	9.42475	4.59955	5.2127	16.3011	6.99905	7.6578	3.8068			3.448	6.4847	5.2093	5.7576	24.1683	7.21055	15.3763	5.86825	7.05805	5.07725	3.99725	6.9051	3.5209	25.0303	9.6272	8.60295	1.7393	20.3393	6.0887	4.2126	3.08495	6.41715	8.551	6.74975	4.163
100	6.29125	22.9387	31.8902	11.6313	9.85005	4.05185	7.879	20.222	9.9432	10.5218	4.11885			6.1076	10.2429	9.18225	10.507	22.1052	8.3553	24.2391	12.9379	6.5557	8.3615	7.16125	9.20245	4.68555	24.3555	10.4035	10.1829	2.8468	38.4462	6.3796	4.31505	2.4132	7.78425	15.3362	6.774	4.023
125	7.24715	23.743	15.5677	12.3018	14.9229	4.8786	6.00485	27.9814	11.8599	10.924	3.2289			5.8767	10.3979	10.2402	12.8384	17.4222	12.9276	18.0773	13.6761	9.3667	8.51905	5.5066	7.474	6.2973	36.8448	10.7623	11.9098	2.84215		6.1645	9.45875	4.1609	6.97215	20.2471	6.8001	6.1642
150	6.19455	17.377	24.344	14.7493	14.3841	5.05225	7.02295		14.602	13.5774	5.47515			6.8804	22.426	12.7373	14.3917		10.5947	15.6534	22.7077	8.75295	6.47795	4.5468	12.6269	10.3123		18.932	16.2692	2.659		10.7019	8.13315	4.09205	8.84245	20.0004	7.81625	6.6405

## Sheet: Nex_ Latency to Initiate_AvgLas
	Nex-/-N1cc/c	Nex-/-N1cc/c	Nex-/-N1cc/c	Nex-/-N1cc/c	Nex-/-N1cc/c	Nex-/-N1cc/c	Nex-/-N1cc/c	Nex-/-N1cc/c	Nex-/-N1cc/c	Nex-/-N1cc/c	Nex-/-N1cc/c	Nex-/-N1cc/c	Nex-/-N1cc/c	Nex+/-N1cc/c	Nex+/-N1cc/c	Nex+/-N1cc/c	Nex+/-N1cc/c	Nex+/-N1cc/c	Nex+/-N1cc/c	Nex+/-N1cc/c	Nex+/-N1cc/c	Nex+/-N1cc/c	Nex+/-N1cc/c	Nex+/-N1cc/c	Nex+/-N1cc/c	Nex+/-N1cc/c	Nex+/-N1cwt/wt	Nex+/-N1cwt/wt	Nex+/-N1cwt/wt	Nex+/-N1cwt/wt	Nex+/-N1cwt/wt	Nex+/-N1cwt/wt	Nex+/-N1cwt/wt	Nex+/-N1cwt/wt	Nex+/-N1cwt/wt	Nex+/-N1cwt/wt	Nex+/-N1cwt/wt	Nex+/-N1cwt/wt	Nex+/-N1cwt/wt
	N1a.363	N1a.364	N1a.367	N1a.40	2N1a.3	65N1a.412N1a	.404N1a.405	N1a.46N1a.3	4N1a.406N1a.6	3N1a.36	N1a.407N1a			.65OA.N	1a.1	N1a.40	8OA.N1a	.3N1a.1	26	1a.411N	1a.102N	1a.147		a.414N	1a.108		OA.N1a.	19	1a.35N	1a.110	N1a.35	3N1a.52N	1a.154N	1a.Dat.	32N1a.5	3N1a.25	1
FR3 v FR1	6.57765	21.3529	23.934	12.8941	13.0524	4.6609	6.96893	24.1017	12.135	11.6744	4.2743			6.28823	14.3556	10.7199	12.579	19.7637	10.6258	19.3233	16.4406	8.22512	7.78617	5.73822	9.76778	7.09838	30.6001	13.3659	12.7873	2.78265	38.4462	7.74867	7.30232	3.55538	7.86628	18.5279	7.13012	5.60923

## Sheet: Nex_ Pr(Low Effort) (25 Trial B
	Nex-/- N1cc/c	Nex-/- N1cc/c	Nex-/- N1cc/c	Nex-/- N1cc/c	Nex-/- N1cc/c	Nex-/- N1cc/c	Nex-/- N1cc/c	Nex-/- N1cc/c	Nex-/- N1cc/c	Nex-/- N1cc/c	Nex-/- N1cc/c	Nex-/- N1cc/c	Nex-/- N1cc/c	Nex+/- N1cc/c	Nex+/- N1cc/c	Nex+/- N1cc/c	Nex+/- N1cc/c	Nex+/- N1cc/c	Nex+/- N1cc/c	Nex+/- N1cc/c	Nex+/- N1cc/c	Nex+/- N1cc/c	Nex+/- N1cc/c	Nex+/- N1cc/c	Nex+/- N1cc/c	Nex+/- N1cc/c	Nex+/- N1cwt/wt	Nex+/- N1cwt/wt	Nex+/- N1cwt/wt	Nex+/- N1cwt/wt	Nex+/- N1cwt/wt	Nex+/- N1cwt/wt	Nex+/- N1cwt/wt	Nex+/- N1cwt/wt	Nex+/- N1cwt/wt	Nex+/- N1cwt/wt	Nex+/- N1cwt/wt	Nex+/- N1cwt/wt	Nex+/- N1cwt/wt
25	0.76	0.46	0.68	0.66	0.76	0.58	0.9	0.5	0.52	0.56	0.8			0.5	0.52	0.44	0.52	0.54	0.66	0.46	0.7	0.44	0.6	0.58	0.06	0.58	0.68	0.64	0.46	0.38	0.6*	0.78	0.44	0.56	0.32	0.74	0.72	0.58
50	0.78	0.42	0.82	0.6	0.36	0.8	0.8	0.76	0.62	0.5	0.34			0.4	0.66	0.56	0.44	0.52	0.48	0.38	0.84	0.56	0.68	0.6	0.62	0.54	0.62	0.7	0.48	0.56	0.6*	0.56	0.64	0.56	0.46	0.58	0.72	0.56
75	0.74	0.66	0.72	0.7	0.8	0.84	0.82	0.7	0.7	0.78	0.6			0.5	0.54	0.66	0.66	0.64	0.68	0.68	0.86	0.64	0.7	0.64	0.6	0.72	0.62	0.76	0.72	0.46	0.6*	0.76	0.76	0.5	0.64	0.74	0.78	0.64
100	0.6	0.62	0.76	0.64	0.74	0.84	0.92	0.8	0.68	0.68	0.64			0.5	0.68	0.72	0.66	0.64	0.78	0.54	0.72	0.54	0.56	0.76	0.68	0.72	0.6	0.74	0.7	0.52	0.54*	0.82	0.8	0.7	0.7	0.78	0.72	0.8
125	0.84	0.64	0.82	0.86	0.78	0.96	0.9	0.76	0.78	0.84	0.72			0.46	0.64	0.86	0.66	0.44	0.72	0.52	0.72	0.48	0.6	0.64	0.54	0.88	1	0.84	0.68	0.72		0.68	0.7	0.8	0.76	0.76	0.86	0.82
150	0.68	0.68	1	0.78	0.84	0.84	0.86		0.76	0.8	0.54			0.82	0.72	0.84	0.52		0.66	0.8	0.86	0.6	0.76	0.92	0.6	0.86		0.96	0.66	0.7		0.84	0.82	0.82	0.64	0.84	0.78	0.86

## Sheet: Nex_ Pr(Low Effort)_AvgLast75Tr
	Nex-/-N1cc/c	Nex-/-N1cc/c	Nex-/-N1cc/c	Nex-/-N1cc/c	Nex-/-N1cc/c	Nex-/-N1cc/c	Nex-/-N1cc/c	Nex-/-N1cc/c	Nex-/-N1cc/c	Nex-/-N1cc/c	Nex-/-N1cc/c	Nex-/-N1cc/c	Nex-/-N1cc/c	Nex+/-N1cc/c	Nex+/-N1cc/c	Nex+/-N1cc/c	Nex+/-N1cc/c	Nex+/-N1cc/c	Nex+/-N1cc/c	Nex+/-N1cc/c	Nex+/-N1cc/c	Nex+/-N1cc/c	Nex+/-N1cc/c	Nex+/-N1cc/c	Nex+/-N1cc/c	Nex+/-N1cc/c	Nex+/-N1cwt/wt	Nex+/-N1cwt/wt	Nex+/-N1cwt/wt	Nex+/-N1cwt/wt	Nex+/-N1cwt/wt	Nex+/-N1cwt/wt	Nex+/-N1cwt/wt	Nex+/-N1cwt/wt	Nex+/-N1cwt/wt	Nex+/-N1cwt/wt	Nex+/-N1cwt/wt	Nex+/-N1cwt/wt	Nex+/-N1cwt/wt
	N1a.363	N1a.364	N1a.367	N1a.40	2N1a.3	65N1a.412N1a	.404N1a.405	N1a.46N1a.3	4N1a.406N1a.6	3N1a.36	N1a.407N1a			.65OA.N	1a.1	N1a.40	8OA.N1a	.3N1a.1	26	1a.411N	1a.102N	1a.147		a.414N	1a.108		OA.N1a.	19	1a.35N	1a.110	N1a.35	3N1a.52N	1a.154N	1a.Dat.	32N1a.5	3N1a.25	1
FR3 v FR1	0.706667	0.646667	0.86	0.76	0.786667	0.88	0.893333	0.78	0.74	0.773333	0.633333			0.593333	0.68	0.806667	0.613333	0.54	0.72	0.62	0.766667	0.54	0.64	0.773333	0.606667	0.82	0.8	0.846667	0.68	0.646667	0.54*	0.78	0.773333	0.773333	0.7	0.793333	0.786667	0.826667

[truncated: 10 more sheets: QModel_ Alpha, QModel_ Beta, QModel_ Constant_12v0, QModel_ Constant_12v2, QModel_ Constant_12v6, QModel_ Constant_12v8, QModel_ Gamma, QModel_ Kappa, RAV_Aggregate, RelLatInit_Aggregate]
