# Supplementary material for: Disruption of Nrxn1α within excitatory forebrain circuits drives value-based dysfunction
Source: eLife. 2020 Dec 4;9:e54838. doi: 10.7554/eLife.54838 (PMC7759380; doi:10.7554/eLife.54838)
Supplement: Figure 6—source data 1. [file elife-54838-fig6-data1.xlsx]

## Sheet: Adaptability Aggregate
	N1C_Homo_Olig(-) Pr(Reward) = .75	N1C_Homo_Olig(-) Pr(Reward) = .75	N1C_Homo_Olig(-) Pr(Reward) = .75	N1C_Homo_Olig(-) Pr(Reward) = .75	N1C_Homo_Olig(-) Pr(Reward) = .75	N1C_Homo_Olig(-) Pr(Reward) = .75	N1C_Homo_Olig(-) Pr(Reward) = .75	N1C_Homo_Olig(-) Pr(Reward) = .75	N1C_Homo_Olig(-) Pr(Reward) = .75	N1C_Homo_Olig(-) Pr(Reward) = .75	N1C_Homo_Olig(-) Pr(Reward) = .75	N1C_Homo_Olig(-) Pr(Reward) = .75	N1C_Homo_Olig(-) Pr(Reward) = .75	N1C_Homo_Olig(-) Pr(Reward) = .4	N1C_Homo_Olig(-) Pr(Reward) = .4	N1C_Homo_Olig(-) Pr(Reward) = .4	N1C_Homo_Olig(-) Pr(Reward) = .4	N1C_Homo_Olig(-) Pr(Reward) = .4	N1C_Homo_Olig(-) Pr(Reward) = .4	N1C_Homo_Olig(-) Pr(Reward) = .4	N1C_Homo_Olig(-) Pr(Reward) = .4	N1C_Homo_Olig(-) Pr(Reward) = .4	N1C_Homo_Olig(-) Pr(Reward) = .4	N1C_Homo_Olig(-) Pr(Reward) = .4	N1C_Homo_Olig(-) Pr(Reward) = .4	N1C_Homo_Olig(-) Pr(Reward) = .4	N1C_Homo_Olig(+) Pr(Reward) = .75	N1C_Homo_Olig(+) Pr(Reward) = .75	N1C_Homo_Olig(+) Pr(Reward) = .75	N1C_Homo_Olig(+) Pr(Reward) = .75	N1C_Homo_Olig(+) Pr(Reward) = .75	N1C_Homo_Olig(+) Pr(Reward) = .75	N1C_Homo_Olig(+) Pr(Reward) = .75	N1C_Homo_Olig(+) Pr(Reward) = .75	N1C_Homo_Olig(+) Pr(Reward) = .75	N1C_Homo_Olig(+) Pr(Reward) = .75	N1C_Homo_Olig(+) Pr(Reward) = .75	N1C_Homo_Olig(+) Pr(Reward) = .75	N1C_Homo_Olig(+) Pr(Reward) = .75	N1C_Homo_Olig(+) Pr(Reward) = .4	N1C_Homo_Olig(+) Pr(Reward) = .4	N1C_Homo_Olig(+) Pr(Reward) = .4	N1C_Homo_Olig(+) Pr(Reward) = .4	N1C_Homo_Olig(+) Pr(Reward) = .4	N1C_Homo_Olig(+) Pr(Reward) = .4	N1C_Homo_Olig(+) Pr(Reward) = .4	N1C_Homo_Olig(+) Pr(Reward) = .4	N1C_Homo_Olig(+) Pr(Reward) = .4	N1C_Homo_Olig(+) Pr(Reward) = .4
	60	62	63	65	70	74	76	77						60	62	63	65	70	74	76	77						39	40	48	57	64	69	71	72	73	75				39	40	48	57	64	69	71	72	73	75
12μL vs 0 μL	0.75	0.7	0.8	0.4	0.4533	0.8923	0.9571	0.6308						0.6154	0.9385	0.6	0.6889	0.48	0.7273	0.6364	0.6364						0.78	0.5091	0.9429	0.5833	0.7286	0.5	1	0.4667	0.62	0.8364				0.5111	0.6444	0.55	0.5714	0.62	0.3	0.7143	0.5	0.4667	0.7714
12μL vs 2 μL	0.5846	0.8222	0.8	0.6667	0.5231	0.775	0.6857	0.66						0.7273	0.625	0.65	0.3333	0.6286	0.6	0.5111	0.5667						0.7	0.4286	0.9	0.4545	0.7333	0.52	0.8909	0.3833	0.5714	0.85				0.55	0.575	0.4	0.6222	0.7273	0.2	0.54	0.475	0.6	0.9
12μL vs 6 μL	0.75	0.5429	0.48	0.7	0.4	0.9667	0.725	0.44						0.575	0.6667	0.8	0.72	0.6	0.3333	0.28	0.6						0.1333	0.6667	0.7667	0.56	0.64	0.2	0.7	0.6	0.3429	0.15				0.6286	0.7667	0.6	0.5667	0.6286	0	0.45	0.5667	0.5714	0.44
12μL vs 8μL	0.75	0.44	0.4	0.6857	0.3333	0.75	0.32	0.52						0.44	0.64	0.64	0.88	0.6286	-0.2	0.75	0.575						0.32	0.7714	0.9667	0.65	0.6	0.5333	0.8857	0.52	0.5333	0.8				0.4	0.7	0.5	0.8	0.5714	0.76	0.3333	0.56	0.55	0.72
[truncated: 3 more columns]

## Sheet: LatChoi_Aggregate
	N1C_Homo_Olig(-) Pr(Reward) = .75	N1C_Homo_Olig(-) Pr(Reward) = .75	N1C_Homo_Olig(-) Pr(Reward) = .75	N1C_Homo_Olig(-) Pr(Reward) = .75	N1C_Homo_Olig(-) Pr(Reward) = .75	N1C_Homo_Olig(-) Pr(Reward) = .75	N1C_Homo_Olig(-) Pr(Reward) = .75	N1C_Homo_Olig(-) Pr(Reward) = .75	N1C_Homo_Olig(-) Pr(Reward) = .75	N1C_Homo_Olig(-) Pr(Reward) = .75	N1C_Homo_Olig(-) Pr(Reward) = .75	N1C_Homo_Olig(-) Pr(Reward) = .75	N1C_Homo_Olig(-) Pr(Reward) = .75	N1C_Homo_Olig(-) Pr(Reward) = .4	N1C_Homo_Olig(-) Pr(Reward) = .4	N1C_Homo_Olig(-) Pr(Reward) = .4	N1C_Homo_Olig(-) Pr(Reward) = .4	N1C_Homo_Olig(-) Pr(Reward) = .4	N1C_Homo_Olig(-) Pr(Reward) = .4	N1C_Homo_Olig(-) Pr(Reward) = .4	N1C_Homo_Olig(-) Pr(Reward) = .4	N1C_Homo_Olig(-) Pr(Reward) = .4	N1C_Homo_Olig(-) Pr(Reward) = .4	N1C_Homo_Olig(-) Pr(Reward) = .4	N1C_Homo_Olig(-) Pr(Reward) = .4	N1C_Homo_Olig(-) Pr(Reward) = .4	N1C_Homo_Olig(+) Pr(Reward) = .75	N1C_Homo_Olig(+) Pr(Reward) = .75	N1C_Homo_Olig(+) Pr(Reward) = .75	N1C_Homo_Olig(+) Pr(Reward) = .75	N1C_Homo_Olig(+) Pr(Reward) = .75	N1C_Homo_Olig(+) Pr(Reward) = .75	N1C_Homo_Olig(+) Pr(Reward) = .75	N1C_Homo_Olig(+) Pr(Reward) = .75	N1C_Homo_Olig(+) Pr(Reward) = .75	N1C_Homo_Olig(+) Pr(Reward) = .75	N1C_Homo_Olig(+) Pr(Reward) = .75	N1C_Homo_Olig(+) Pr(Reward) = .75	N1C_Homo_Olig(+) Pr(Reward) = .75	N1C_Homo_Olig(+) Pr(Reward) = .4	N1C_Homo_Olig(+) Pr(Reward) = .4	N1C_Homo_Olig(+) Pr(Reward) = .4	N1C_Homo_Olig(+) Pr(Reward) = .4	N1C_Homo_Olig(+) Pr(Reward) = .4	N1C_Homo_Olig(+) Pr(Reward) = .4	N1C_Homo_Olig(+) Pr(Reward) = .4	N1C_Homo_Olig(+) Pr(Reward) = .4	N1C_Homo_Olig(+) Pr(Reward) = .4	N1C_Homo_Olig(+) Pr(Reward) = .4
	60	62	63	65	70	74	76	77						60	62	63	65	70	74	76	77						39	40	48	57	64	69	71	72	73	75				39	40	48	57	64	69	71	72	73	75
12μL vs 0 μL	0.258	0.2728	0.2932	0.2324	0.2641	0.2849	0.2803	0.2295						0.2552	0.259	0.3041	0.2291	0.2474	0.2401	0.2622	0.2238						0.2775	0.2667	0.3015	0.3009	0.3002	0.253	0.2973	0.2618	0.2598	0.265				0.2662	0.2396	0.335	0.3163	0.3069	0.2245	0.3851	0.2987	0.2683	0.2685
12μL vs 2 μL	0.2653	0.2652	0.2899	0.2469	0.2649	0.2421	0.2551	0.2161						0.2756	0.2717	0.2751	0.2265	0.2451	0.2554	0.2587	0.2155						0.274	0.233	0.3084	0.2938	0.3091	0.2433	0.2941	0.2409	0.2416	0.2678				0.2712	0.2627	0.3202	0.3184	0.2614	0.235	0.261	0.2565	0.2465	0.2599
12μL vs 6 μL	0.2615	0.2403	0.2622	0.2345	0.2404	0.251	0.2865	0.234						0.2499	0.2427	0.2577	0.2315	0.273	0.2431	0.2449	0.2044						0.2665	0.2329	0.323	0.2678	0.2718	0.2327	0.3198	0.2333	0.2695	0.2801				0.274	0.2384	0.2923	0.2821	0.2839	0.2306	0.2371	0.2407	0.2586	0.2366
12μL vs 8μL	0.247	0.3055	0.255	0.2275	0.2821	0.2494	0.2455	0.23						0.2293	0.2655	0.236	0.2245	0.2691	0.2426	0.2509	0.21						0.2891	0.2369	0.2919	0.2426	0.2997	0.2417	0.3071	0.2083	0.2704	0.2627				0.2944	0.2553	0.2953	0.2758	0.2614	0.2279	0.287	0.2385	0.2499	0.2952
[truncated: 3 more columns]

## Sheet: LatInit_Aggregate
	N1C_Homo_Olig(-) Pr(Reward) = .75	N1C_Homo_Olig(-) Pr(Reward) = .75	N1C_Homo_Olig(-) Pr(Reward) = .75	N1C_Homo_Olig(-) Pr(Reward) = .75	N1C_Homo_Olig(-) Pr(Reward) = .75	N1C_Homo_Olig(-) Pr(Reward) = .75	N1C_Homo_Olig(-) Pr(Reward) = .75	N1C_Homo_Olig(-) Pr(Reward) = .75	N1C_Homo_Olig(-) Pr(Reward) = .75	N1C_Homo_Olig(-) Pr(Reward) = .75	N1C_Homo_Olig(-) Pr(Reward) = .75	N1C_Homo_Olig(-) Pr(Reward) = .75	N1C_Homo_Olig(-) Pr(Reward) = .75	N1C_Homo_Olig(-) Pr(Reward) = .4	N1C_Homo_Olig(-) Pr(Reward) = .4	N1C_Homo_Olig(-) Pr(Reward) = .4	N1C_Homo_Olig(-) Pr(Reward) = .4	N1C_Homo_Olig(-) Pr(Reward) = .4	N1C_Homo_Olig(-) Pr(Reward) = .4	N1C_Homo_Olig(-) Pr(Reward) = .4	N1C_Homo_Olig(-) Pr(Reward) = .4	N1C_Homo_Olig(-) Pr(Reward) = .4	N1C_Homo_Olig(-) Pr(Reward) = .4	N1C_Homo_Olig(-) Pr(Reward) = .4	N1C_Homo_Olig(-) Pr(Reward) = .4	N1C_Homo_Olig(-) Pr(Reward) = .4	N1C_Homo_Olig(+) Pr(Reward) = .75	N1C_Homo_Olig(+) Pr(Reward) = .75	N1C_Homo_Olig(+) Pr(Reward) = .75	N1C_Homo_Olig(+) Pr(Reward) = .75	N1C_Homo_Olig(+) Pr(Reward) = .75	N1C_Homo_Olig(+) Pr(Reward) = .75	N1C_Homo_Olig(+) Pr(Reward) = .75	N1C_Homo_Olig(+) Pr(Reward) = .75	N1C_Homo_Olig(+) Pr(Reward) = .75	N1C_Homo_Olig(+) Pr(Reward) = .75	N1C_Homo_Olig(+) Pr(Reward) = .75	N1C_Homo_Olig(+) Pr(Reward) = .75	N1C_Homo_Olig(+) Pr(Reward) = .75	N1C_Homo_Olig(+) Pr(Reward) = .4	N1C_Homo_Olig(+) Pr(Reward) = .4	N1C_Homo_Olig(+) Pr(Reward) = .4	N1C_Homo_Olig(+) Pr(Reward) = .4	N1C_Homo_Olig(+) Pr(Reward) = .4	N1C_Homo_Olig(+) Pr(Reward) = .4	N1C_Homo_Olig(+) Pr(Reward) = .4	N1C_Homo_Olig(+) Pr(Reward) = .4	N1C_Homo_Olig(+) Pr(Reward) = .4	N1C_Homo_Olig(+) Pr(Reward) = .4
	60	62	63	65	70	74	76	77						60	62	63	65	70	74	76	77						39	40	48	57	64	69	71	72	73	75				39	40	48	57	64	69	71	72	73	75
12μL vs 0 μL	5.5401	8.5935	12.5245	10.0268	7.2161	12.1181	7.5408	11.4761						2.9219	6.1612	8.8101	10.9142	9.1532	6.3406	6.4422	7.0254						11.4279	8.0229	9.3759	7.6264	9.526	13.3068	17.7645	4.8356	12.2199	12.1393				11.1269	9.6696	9.2526	5.0318	6.0475	5.7992	13.9108	4.7248	9.3535	14.5346
12μL vs 2 μL	5.597	6.2927	16.0143	12.241	7.0676	4.4797	14.6476	10.1011						3.8024	6.7153	8.4298	14.6096	6.6967	4.3777	7.2778	8.6932						9.9747	9.7495	11.2369	8.0227	11.7718	11.6715	10.7801	5.9482	10.4534	11.6708				11.2654	5.5067	8.5983	6.2022	5.5959	8.4667	7.8857	4.6688	10.416	13.4825
12μL vs 6 μL	6.8382	6.864	11.7886	12.1839	8.5737	5.4535	6.7827	14.0499						3.6401	7.2423	10.6549	9.1151	5.7222	5.7469	5.5454	7.5805						9.5866	12.4358	10.2635	9.0085	11.2334	10.8349	12.5647	7.1775	9.4889	8.5253				11.4756	7.2345	6.64	5.4179	5.6778	7.7086	10.0056	5.8373	8.7094	11.2011
12μL vs 8μL	7.0944	8.4894	15.2095	10.2964	9.4833	6.1595	9.2136	10.1165						2.8512	6.0843	9.8657	9.5686	8.381	6.4129	5.6045	8.3688						9.7131	10.5881	11.7237	8.987	10.4391	14.9131	14.8485	8.1231	12.0657	11.4193				8.0444	7.2042	7.2589	6.6014	6.5905	6.8068	9.7542	5.9568	12.3215	9.5011
[truncated: 3 more columns]

## Sheet: Lose_Switch Aggregate
	N1C_Homo_Olig(-) Pr(Reward) = .75	N1C_Homo_Olig(-) Pr(Reward) = .75	N1C_Homo_Olig(-) Pr(Reward) = .75	N1C_Homo_Olig(-) Pr(Reward) = .75	N1C_Homo_Olig(-) Pr(Reward) = .75	N1C_Homo_Olig(-) Pr(Reward) = .75	N1C_Homo_Olig(-) Pr(Reward) = .75	N1C_Homo_Olig(-) Pr(Reward) = .75	N1C_Homo_Olig(-) Pr(Reward) = .75	N1C_Homo_Olig(-) Pr(Reward) = .75	N1C_Homo_Olig(-) Pr(Reward) = .75	N1C_Homo_Olig(-) Pr(Reward) = .75	N1C_Homo_Olig(-) Pr(Reward) = .75	N1C_Homo_Olig(-) Pr(Reward) = .4	N1C_Homo_Olig(-) Pr(Reward) = .4	N1C_Homo_Olig(-) Pr(Reward) = .4	N1C_Homo_Olig(-) Pr(Reward) = .4	N1C_Homo_Olig(-) Pr(Reward) = .4	N1C_Homo_Olig(-) Pr(Reward) = .4	N1C_Homo_Olig(-) Pr(Reward) = .4	N1C_Homo_Olig(-) Pr(Reward) = .4	N1C_Homo_Olig(-) Pr(Reward) = .4	N1C_Homo_Olig(-) Pr(Reward) = .4	N1C_Homo_Olig(-) Pr(Reward) = .4	N1C_Homo_Olig(-) Pr(Reward) = .4	N1C_Homo_Olig(-) Pr(Reward) = .4	N1C_Homo_Olig(+) Pr(Reward) = .75	N1C_Homo_Olig(+) Pr(Reward) = .75	N1C_Homo_Olig(+) Pr(Reward) = .75	N1C_Homo_Olig(+) Pr(Reward) = .75	N1C_Homo_Olig(+) Pr(Reward) = .75	N1C_Homo_Olig(+) Pr(Reward) = .75	N1C_Homo_Olig(+) Pr(Reward) = .75	N1C_Homo_Olig(+) Pr(Reward) = .75	N1C_Homo_Olig(+) Pr(Reward) = .75	N1C_Homo_Olig(+) Pr(Reward) = .75	N1C_Homo_Olig(+) Pr(Reward) = .75	N1C_Homo_Olig(+) Pr(Reward) = .75	N1C_Homo_Olig(+) Pr(Reward) = .75	N1C_Homo_Olig(+) Pr(Reward) = .4	N1C_Homo_Olig(+) Pr(Reward) = .4	N1C_Homo_Olig(+) Pr(Reward) = .4	N1C_Homo_Olig(+) Pr(Reward) = .4	N1C_Homo_Olig(+) Pr(Reward) = .4	N1C_Homo_Olig(+) Pr(Reward) = .4	N1C_Homo_Olig(+) Pr(Reward) = .4	N1C_Homo_Olig(+) Pr(Reward) = .4	N1C_Homo_Olig(+) Pr(Reward) = .4	N1C_Homo_Olig(+) Pr(Reward) = .4
	60	62	63	65	70	74	76	77						60	62	63	65	70	74	76	77						39	40	48	57	64	69	71	72	73	75				39	40	48	57	64	69	71	72	73	75
12μL vs 0 μL	0.4458	0.4203	0.549	0.65	0.5063	0.4423	0.4521	0.5217						0.5362	0.4118	0.4821	0.4184	0.3803	0.5051	0.4692	0.4176						0.451	0.4805	0.5	0.5152	0.5439	0.6415	0.697	0.4255	0.4576	0.4651				0.4861	0.5132	0.4406	0.4037	0.4828	0.4608	0.4286	0.4784	0.5	0.4712
12μL vs 2 μL	0.5732	0.5	0.5208	0.4118	0.5357	0.5579	0.4286	0.4746						0.5432	0.5056	0.5	0.5138	0.5198	0.4466	0.4564	0.4286						0.5741	0.5238	0.5645	0.3571	0.6327	0.3944	0.5424	0.4505	0.4677	0.3913				0.4179	0.5294	0.5223	0.3771	0.4318	0.426	0.5488	0.4871	0.5274	0.448
12μL vs 6 μL	0.4878	0.3692	0.5116	0.5	0.4521	0.4235	0.6	0.4655						0.5546	0.3698	0.4651	0.4671	0.4928	0.4819	0.4581	0.5057						0.5088	0.6	0.5517	0.5179	0.439	0.5185	0.4902	0.5217	0.3803	0.5645				0.5141	0.5138	0.5263	0.4416	0.4856	0.5363	0.3953	0.5238	0.506	0.4884
12μL vs 8μL	0.5455	0.6207	0.4348	0.4688	0.4348	0.4342	0.4127	0.5091						0.5455	0.4869	0.5229	0.5066	0.5541	0.4112	0.4977	0.5444						0.4583	0.5263	0.4386	0.507	0.4789	0.5745	0.4091	0.6197	0.5254	0.625				0.5257	0.5227	0.4566	0.4362	0.4031	0.4205	0.5069	0.5172	0.4015	0.4832
[truncated: 3 more columns]

## Sheet: Olig_ Latency to Choice (25 Tri
	Olig-/- N1cc/c	Olig-/- N1cc/c	Olig-/- N1cc/c	Olig-/- N1cc/c	Olig-/- N1cc/c	Olig-/- N1cc/c	Olig-/- N1cc/c	Olig-/- N1cc/c	Olig-/- N1cc/c	Olig-/- N1cc/c	Olig-/- N1cc/c	Olig-/- N1cc/c	Olig-/- N1cc/c	Olig+/- N1cc/c	Olig+/- N1cc/c	Olig+/- N1cc/c	Olig+/- N1cc/c	Olig+/- N1cc/c	Olig+/- N1cc/c	Olig+/- N1cc/c	Olig+/- N1cc/c	Olig+/- N1cc/c	Olig+/- N1cc/c	Olig+/- N1cc/c	Olig+/- N1cc/c	Olig+/- N1cc/c
25	0.26405	0.2398	0.26035	0.2717	0.2504	0.2462	0.2572	0.23665						0.3148	0.27245	0.3006	0.3327	0.29005	0.24805	0.25355	0.28355	0.26905	0.3125
50	0.2389	0.24955	0.22815	0.25095	0.2829	0.2309	0.26805	0.26285						0.2674	0.27225	0.3387	0.2383	0.3744	0.23945	0.26505	0.24905	0.2368	0.2838
75	0.232	0.23145	0.2267	0.23345	0.229	0.2044	0.24835	0.29						0.31415	0.23215	0.3357	0.3631	0.3058	0.28855	0.2547	0.2584	0.2154	0.252
100	0.218	0.2375	0.22135	0.21515	0.2518	0.2204	0.2405	0.24575						0.2763	0.2467	0.35905	0.2468	0.28225	0.23115	0.2338	0.2355	0.2021	0.2402
125	0.20525	0.2218	0.24175	0.21935	0.2408	0.20665	0.2574	0.2502						0.27085	0.271	0.5054	0.2679	0.28225	0.2073	0.2585	0.1949	0.21435	0.25415
150	0.2054	0.258	0.2241	0.2302	0.2201	0.22195	0.23505	0.23775						0.28195	0.2804	0.4967	0.27815	0.2896	0.23805	0.2343	0.2082	0.2103	0.2805

## Sheet: Olig_ Latency to Choice_AvgLast
	Olig-/-N1cc/c	Olig-/-N1cc/c	Olig-/-N1cc/c	Olig-/-N1cc/c	Olig-/-N1cc/c	Olig-/-N1cc/c	Olig-/-N1cc/c	Olig-/-N1cc/c	Olig-/-N1cc/c	Olig-/-N1cc/c	Olig-/-N1cc/c	Olig-/-N1cc/c	Olig-/-N1cc/c	Olig+/-N1cc/c	Olig+/-N1cc/c	Olig+/-N1cc/c	Olig+/-N1cc/c	Olig+/-N1cc/c	Olig+/-N1cc/c	Olig+/-N1cc/c	Olig+/-N1cc/c	Olig+/-N1cc/c	Olig+/-N1cc/c	Olig+/-N1cc/c	Olig+/-N1cc/c	Olig+/-N1cc/c
	N1a.363	N1a.364	N1a.367	N1a.40	2N1a.3	65N1a.412N1a	.404N1a.405	N1a.46N1a.3	4N1a.406N1a.6	3N1a.36	N1a.407N1a			.65OA.N	1a.1	N1a.40	8OA.N1a	.3N1a.1	26	1a.411N	1a.102N	1a.147		a.414N	1a.108
FR3 v FR1FR3	0.20955	0.2391	0.229067	0.221567	0.237567	0.216333	0.244317	0.244567						0.276367	0.266033	0.453717	0.264283	0.2847	0.2255	0.2422	0.212867	0.208917	0.258283

## Sheet: Olig_ Latency to Initiate (25 T
	Olig-/- N1cc/c	Olig-/- N1cc/c	Olig-/- N1cc/c	Olig-/- N1cc/c	Olig-/- N1cc/c	Olig-/- N1cc/c	Olig-/- N1cc/c	Olig-/- N1cc/c	Olig-/- N1cc/c	Olig-/- N1cc/c	Olig-/- N1cc/c	Olig-/- N1cc/c	Olig-/- N1cc/c	Olig+/- N1cc/c	Olig+/- N1cc/c	Olig+/- N1cc/c	Olig+/- N1cc/c	Olig+/- N1cc/c	Olig+/- N1cc/c	Olig+/- N1cc/c	Olig+/- N1cc/c	Olig+/- N1cc/c	Olig+/- N1cc/c	Olig+/- N1cc/c	Olig+/- N1cc/c	Olig+/- N1cc/c
25	2.3326	2.7101	6.01285	8.66675	6.09795	3.23075	3.3465	6.1374						6.33435	7.61965	4.7472	6.2252	3.9211	3.46615	2.9376	2.0841	4.2337	2.92375
50	2.9169	3.5943	14.1582	12.2058	4.79975	6.1394	4.6263	5.8064						8.4367	8.97315	7.6553	8.9804	4.82805	4.94545	4.44835	1.9805	2.82825	3.6562
75	4.0656	3.08745	14.3486	16.6766	5.59125	4.9496	4.2844	4.48465						6.6082	8.80835	6.92435	12.8476	7.6014	5.4519	4.3823	3.2007	5.6772	2.40895
100	5.22475	2.8927	12.8827	18.502	7.22175	4.61385	6.1549	4.4235						10.8093	7.70575	12.4291	17.0728	5.4989	7.25785	8.16035	3.10215	6.81845	7.5491
125	7.445	4.38015	20.8849	17.3608	7.944	4.4004	6.94475	5.40715						8.79055	12.3704	25.74	15.3282	13.366	9.4142	8.75505	3.76785	10.5281	8.8545
150	9.63495	3.656	15.6037	25.8302	6.5015	5.41305	7.01485	5.26325						13.9001	10.3216	24.5567	22.2413	11.6944	8.20415	6.83965	5.1972	9.91555	8.7907

## Sheet: Olig_ Latency to Initiate_AvgLa
	Olig-/-N1cc/c	Olig-/-N1cc/c	Olig-/-N1cc/c	Olig-/-N1cc/c	Olig-/-N1cc/c	Olig-/-N1cc/c	Olig-/-N1cc/c	Olig-/-N1cc/c	Olig-/-N1cc/c	Olig-/-N1cc/c	Olig-/-N1cc/c	Olig-/-N1cc/c	Olig-/-N1cc/c	Olig+/-N1cc/c	Olig+/-N1cc/c	Olig+/-N1cc/c	Olig+/-N1cc/c	Olig+/-N1cc/c	Olig+/-N1cc/c	Olig+/-N1cc/c	Olig+/-N1cc/c	Olig+/-N1cc/c	Olig+/-N1cc/c	Olig+/-N1cc/c	Olig+/-N1cc/c	Olig+/-N1cc/c
	N1a.363	N1a.364	N1a.367	N1a.40	2N1a.3	65N1a.412N1a	.404N1a.405	N1a.46N1a.3	4N1a.406N1a.6	3N1a.36	N1a.407N1a			.65OA.N	1a.1	N1a.40	8OA.N1a	.3N1a.1	26	1a.411N	1a.102N	1a.147		a.414N	1a.108
FR3 v FR1FR3	7.4349	3.64295	16.4571	20.5644	7.22242	4.8091	6.70483	5.0313						11.1666	10.1326	20.9086	18.2141	10.1864	8.29207	7.91835	4.0224	9.08737	8.3981

## Sheet: Olig_ Pr(Low Effort) (25 Trial 
	Olig-/-N1cc/c	Olig-/-N1cc/c	Olig-/-N1cc/c	Olig-/-N1cc/c	Olig-/-N1cc/c	Olig-/-N1cc/c	Olig-/-N1cc/c	Olig-/-N1cc/c	Olig-/-N1cc/c	Olig-/-N1cc/c	Olig-/-N1cc/c	Olig-/-N1cc/c	Olig-/-N1cc/c	Olig+/-N1cc/c	Olig+/-N1cc/c	Olig+/-N1cc/c	Olig+/-N1cc/c	Olig+/-N1cc/c	Olig+/-N1cc/c	Olig+/-N1cc/c	Olig+/-N1cc/c	Olig+/-N1cc/c	Olig+/-N1cc/c	Olig+/-N1cc/c	Olig+/-N1cc/c	Olig+/-N1cc/c
25	0.66	0.66	0.5	0.5	0.44	0.5	0.56	0.48						0.68	0.44	0.5	0.44	0.36	0.68	0.68	0.62	0.8	0.64
50	0.64	0.5	0.32	0.6	0.7	0.46	0.58	0.5						0.6	0.62	0.54	0.64	0.48	0.7	0.56	0.68	0.72	0.94
75	0.68	0.54	0.64	0.58	0.56	0.46	0.54	0.56						0.64	0.58	0.48	0.64	0.46	0.56	0.82	0.64	0.56	0.64
100	0.78	0.58	0.72	0.68	0.64	0.62	0.7	0.56						0.72	0.54	0.48	0.62	0.44	0.64	0.7	0.68	0.74	0.7
125	0.62	0.64	0.72	0.66	0.72	0.54	0.44	0.58						0.52	0.7	0.54	0.6	0.48	0.76	0.62	0.58	0.7	0.64
150	0.68	0.44	0.88	0.78	0.72	0.72	0.78	0.5						0.62	0.66	0.12	0.62	0.64	0.7	0.56	0.74	0.78	0.64

## Sheet: Olig_ Pr(Low Effort)_AvgLast75T
	Olig-/-N1cc/c	Olig-/-N1cc/c	Olig-/-N1cc/c	Olig-/-N1cc/c	Olig-/-N1cc/c	Olig-/-N1cc/c	Olig-/-N1cc/c	Olig-/-N1cc/c	Olig-/-N1cc/c	Olig-/-N1cc/c	Olig-/-N1cc/c	Olig-/-N1cc/c	Olig-/-N1cc/c	Olig+/-N1cc/c	Olig+/-N1cc/c	Olig+/-N1cc/c	Olig+/-N1cc/c	Olig+/-N1cc/c	Olig+/-N1cc/c	Olig+/-N1cc/c	Olig+/-N1cc/c	Olig+/-N1cc/c	Olig+/-N1cc/c	Olig+/-N1cc/c	Olig+/-N1cc/c	Olig+/-N1cc/c
	N1a.363	N1a.364	N1a.367	N1a.40	2N1a.3	65N1a.412N1a	.404N1a.405	N1a.46N1a.3	4N1a.406N1a.6	3N1a.36	N1a.407N1a			.65OA.N	1a.1	N1a.40	8OA.N1a	.3N1a.1	26	1a.411N	1a.102N	1a.147		a.414N	1a.108
FR3 v FR1FR3	0.693333	0.553333	0.773333	0.706667	0.693333	0.626667	0.64	0.546667						0.62	0.633333	0.38	0.613333	0.52	0.7	0.626667	0.666667	0.74	0.66

[truncated: 10 more sheets: QModel_ Alpha, QModel_ Beta, QModel_ Constant_12v0, QModel_ Constant_12v2, QModel_ Constant_12v6, QModel_ Constant_12v8, QModel_ Gamma, QModel_ Kappa, RAV_Aggregate, RelLatInit_Aggregate]
