# Supplementary material for: Disruption of Nrxn1α within excitatory forebrain circuits drives value-based dysfunction
Source: eLife. 2020 Dec 4;9:e54838. doi: 10.7554/eLife.54838 (PMC7759380; doi:10.7554/eLife.54838)
Supplement: Figure 7—source data 1. [file elife-54838-fig7-data1.xlsx]

## Sheet: Integral_RAV_Regression
Relative Action Values	Integrals
	Nex.23
0.297549	-5.16379
0.653253	-117.243
0.653253	-92.6111
0.0581543	-45.3705
0.653253	15.7219
0.653253	-6.88187
0.653253	-31.0042
0.653253	63.9031
0.653253	58.8469
0.956558	-202.092
1.18777	-132.845
1.24728	31.1677
0.53587	72.9364
0.364188	59.5836
0.34722	209.352
1.03532	-157.617
0.309638	-127.565
1.02128	-164.629
0.306025	66.9137
1.30379	-13.7978
1.535	-92.2858
1.59451	57.4679
1.60982	141.444
0.715357	116.409
0.188028	129.188
0.235403	64.6194
1.61501	-26.8569
0.88858	32.0626
1.60003	220.739
0.884724	-151.821
0.185509	-95.5829
0.712825	-126.321
0.665447	-109.077
0.042823	-54.6938
0.0420154	22.2396
0.657199	-126.038
0.654061	-92.3989
0.653253	-6.1172
0.0579465	3.35068
0.057893	63.8282
0.653307	-66.369
0.653253	-38.0186
0.956544	-165.696
1.18775	-182.077
0.348855	7.26698
0.362538	-36.4551
0.362535	7.52042
0.132973	167.895
0.578434	123.532
0.975814	-57.4549
1.19273	-0.00663604
0.350149	-82.9389
1.03171	93.3895
0.320299	-39.4803
0.320299	-156.744
0.320299	-207.484
0.320299	144.474
1.20711	-55.4525
0.353851	-75.1487
1.03266	224.892
0.321251	225.107
0.321251	65.0277
0.321251	-52.3096
1.20736	-160.429
1.25232	-77.1579
1.26389	-71.0483
0.368463	67.5604
1.03642	-32.1858
1.20833	-100.635
1.25257	-107.349
0.54116	150.843
1.26395	-119.643
0.36848	155.199
0.342928	50.6185
0.13802	-67.7438
1.47179	-201.448
0.804601	48.7412
1.5313	-114.612
0.819916	72.4737
0.16782	92.4034
0.183084	34.2617
0.187013	89.6571
0.188024	105.876
1.61475	-129.039
1.79885	32.6593
0.947824	89.1361
0.728804	70.5283
1.57084	218.506
0.859693	84.0712
0.85976	-8.5161
1.78787	-208.126
0.945243	-61.3613
0.233853	-80.0786
0.233857	60.8934
0.728404	7.94059
0.672593	155.66
1.55663	-262.957
0.885747	176.68
0.17434	134.119
0.174341	99.8009
1.61149	-194.367
0.900085	157.244
0.899866	81.2253
1.61513	-143.121
1.79921	-58.9257
1.84658	-21.8357
1.85877	370.225
1.86191	33.5296
1.86272	-29.656
0.964522	-29.1919
0.645289	282.205
0.165042	98.184
0.224534	136.926
0.239845	-14.9962
0.243785	-99.8586
1.18641	-57.2944
0.476013	-14.9184
1.24693	148.332
0.363837	-53.8535
0.34731	-64.6372
1.03523	-104.718
1.20795	-145.05
1.2524	87.4604
1.26384	68.3539
0.552504	-29.9464
0.552521	-169.28
1.26687	-163.267
0.369227	80.6624
0.342176	-68.6955
0.342175	-56.9322
1.03662	-65.4673
1.20838	-213.428
1.25258	200.179
0.365552	-38.5625
0.137266	-23.0805
0.574141	-144.707
0.574141	-144.062
0.574141	-142.662
0.574141	77.9244
0.0785147	156.451
0.632893	65.8354
0.0633943	-26.5497
0.957907	-171.465
1.18812	-91.2905
0.348963	13.0133
0.362445	37.7065
1.0314	149.761
1.20703	-144.389
1.25223	-141.287
0.365464	-72.0429
1.24435	-227.471
0.577158	-66.5842
0.405449	33.8121
0.0777383	52.2244
0.589478	46.6811
0.0631945	22.0949
1.17954	-31.4476
0.838952	-157.1
0.880243	-213.315
0.172726	-65.3527
0.173727	69.9162
1.61108	40.9837
0.899502	-54.5891
1.61477	124.579
1.79886	-149.196
1.84623	32.4343
1.85843	-35.5919
1.86156	-180.712
0.963967	-56.0976
0.645587	-64.2945
0.165185	24.5063
0.224637	-18.5601
0.239938	107.964
0.243875	-76.1012
0.244889	-30.568
0.28904	89.4392
0.422107	106.668
0.42204	-11.2961
0.422022	-101.194
0.11766	-75.6886
0.593743	31.1403
0.593742	179.56
0.971874	-149.27
1.19171	-232.91
1.24829	-105.804
1.26285	-88.8576
0.368196	10.4822
1.03635	-75.3102
1.20831	-62.165
0.354158	48.0309
0.134334	97.6386
0.0777596	69.4198
0.0631997	-14.6804
0.0594525	41.2371
1.55036	127.909
1.78157	-164.616
1.84108	10.4019
1.85639	-20.0709
1.86033	47.676
1.86135	71.5909
0.963205	79.6221
0.732058	98.1927
0.67257	54.0904
0.65726	40.6599
0.65332	16.1494
0.955527	-14.5898
0.245134	10.0453
0.289103	210.538
0.422044	-42.3957
0.421977	-128.198
0.421959	2.58051
0.117676	-30.4504
0.593727	-115.126
0.971877	-279.7
0.26047	29.5831
0.293311	20.7429
0.418097	40.5361
0.418097	-96.3317
1.01708	-105.249
1.20335	-218.97
1.25129	202.438
1.26362	49.9375
1.2668	-137.69
1.26762	-89.5563
1.26783	-141.792
0.369476	-76.8278
0.138276	150.784
1.47153	-53.2392
1.70275	-38.899
1.76225	22.7766
1.77757	-104.522
1.78151	-27.9946
1.78252	-69.9363
1.78279	-104.222
1.78285	7.1461
0.884466	117.843
0.653256	127.492
0.593752	20.5361
0.578438	12.1256
0.971871	-16.1063
0.264405	55.6847
0.293309	3.6119
0.417084	56.6211
0.416823	-86.4501
0.416756	72.5639
1.01741	-120.166
0.306016	-30.3956
1.20343	-81.7597
0.492029	59.2775
1.25131	-59.4286
0.539901	128.596
0.365225	-48.1123
0.346182	-127.376
0.346182	-138.746
1.03559	-82.0191
0.324179	102.59
0.309707	-54.2503
0.401701	11.7935
0.401701	130.172
1.0213	-16.6386
1.20443	4.87886
1.25157	-101.207
0.365292	-83.1427
1.0356	-34.4633
1.20812	17.8138
0.354109	-19.462
0.134321	121.711
1.47549	-81.7613
0.8083	-89.5655
0.153457	-24.1145
0.168015	52.6573
0.171761	-91.7839
0.172725	-129.874
0.712424	7.01337
0.00126505	2.18488
0.00132891	16.6238
0.668545	46.2072
1.55558	-39.5315
1.78386	-105.401
0.944211	-5.33522
1.62652	136.525
1.80212	-70.4971
1.84731	21.6194
1.13592	86.2273
0.960558	12.5857
0.732337	-47.219
0.87747	-232.116
0.224798	-63.7791
0.239914	11.3396
0.82683	255.788
0.475017	121.566
0.476018	65.7437
0.476276	-65.2018
1.24719	-221.216
1.2625	227.917
1.26644	-78.0535
0.555103	118.161
0.55512	0.319522
1.26754	-95.0149
0.556138	-52.3743
0.55614	-192.211
0.369404	124.865
0.342003	-103.863
1.03666	-248.585
0.309984	191.087
0.401424	-138.277
0.122965	16.5946
0.588442	305.569
0.973238	-26.725
0.261831	-39.5329
0.261831	-53.0654
0.293661	21.557
1.01717	-186.95
0.305761	-41.9672
1.20337	-168.443
1.25129	-11.3051
1.26363	-97.0006
0.552218	75.7914
1.2668	-24.9028
1.26762	-84.1496
0.556208	48.0746
0.556208	-50.2692
0.556208	-72.7432
0.556208	-133.653
0.556208	5.32936
0.369422	-3.13748
1.03667	-171.879
0.309985	-3.48137
1.02137	-83.7528
1.20445	273.743
0.353166	0.292737
1.03248	-212.528
0.321075	-11.0604
1.20731	-129.336
0.353902	156.238
0.134268	284.685
1.47554	-29.1307
1.70676	71.3846
1.05187	171.648
1.82279	-22.0471
1.8381	-19.0145
0.943639	37.7141
0.246779	129.063
0.250523	-62.2977
0.251487	126.431
0.251735	86.3761
0.251798	60.1524
0.251815	187.139
1.63143	35.2093
0.920023	42.9696
0.920025	109.958
0.904998	11.3957
1.61645	-89.6035
1.79954	191.295
1.84667	235.947
1.85879	69.8065
1.14739	165.262
1.14739	73.9976
1.86192	79.9569
0.964316	39.3842
0.252908	64.6848
1.63171	-75.7239
1.80347	134.269
1.84768	66.5918
0.960651	25.0926
0.249244	151.27
0.732365	198.315
0.0209579	113.758
1.57202	-65.4764
1.78811	133.555
0.945321	94.1222
0.72842	63.6913
0.672598	51.1293
0.658232	-1.77187
0.654534	-14.2569
0.653583	-49.0642
0.653338	-75.6425
0.956473	-58.1199
0.245129	129.173
0.245145	-133.811
0.245149	-125.544
0.24515	-15.5976
1.18777	-182.971
0.476365	52.8383
0.476365	102.35
1.24728	-73.946
0.364188	38.9024
1.03532	-246.345
1.20804	-162.203
1.25249	-147.599
0.36553	126.208
0.345877	73.7275
0.137261	32.8478
0.0785133	242.604
0.0633939	53.3563
1.54642	-185.747
0.879227	-212.276
0.707519	158.757
0.663328	143.184
0.0441884	-18.8408
0.043187	1.62719
0.0429293	-29.5098
0.042863	4.84259
0.0428459	83.0888
0.0428415	66.041
0.0428404	86.4016
1.5556	-104.66
0.885481	-4.75734
0.174074	4.7252
0.174074	88.1962
1.61142	37.4625
1.79825	50.148
1.84633	104.203
0.960306	20.5946
0.248898	165.472
1.63068	-156.18
1.80321	68.0242
1.49191	177.418
0.237799	-106.873
0.904989	-155.58
1.0767	9.21195
0.901128	40.9542
0.672855	12.9768
0.614107	-25.0591
0.951513	-123.249
1.17135	-154.291
1.22793	-142.728
1.24249	1.00317
0.347837	245.307
0.348451	6.36905
0.34456	35.0491
1.035	101.702
0.324596	-49.2098
1.20796	-84.8156
0.496811	-53.4769
1.25247	-204.7
0.365459	92.9887
1.03558	20.2808
1.20804	-153.361
1.25243	-71.9108
1.26385	-127.136
0.368387	82.7506
0.13793	119.45
0.0786191	148.996
1.53113	-43.5515
0.863919	-21.6914
1.59061	50.8365
1.77763	92.7976
0.92736	-5.53646
1.60694	-33.2
1.78183	-104.317
1.82685	174.895
0.940025	167.375
0.711793	-43.8925
0.653055	-69.5885
0.637938	138.929
0.956609	61.3063
0.249092	45.2754
1.18779	-146.803
0.347876	44.4959
0.36253	174.569
0.362273	59.6862
0.132975	-117.174
0.578366	-33.5126
0.578349	29.4328
0.578345	81.2708
0.975836	-231.153
1.19273	-58.8854
1.24855	-40.5954
0.364515	-59.3762
1.0354	-182.068
1.20806	-86.2131
0.354094	119.384
0.357312	-34.1183
1.03272	-167.364
0.308969	115.838
1.30084	-54.3943
0.7757	-8.67913
1.71832	-25.0984
1.77783	38.0864
0.894737	27.9885
1.56587	-61.2919
0.840187	238.819
0.176717	103.303
0.189054	99.8184
1.6121	-60.292
1.79525	-42.3738
1.84239	261.301
0.235751	22.5727
0.0608858	-37.4166
0.167206	5.9092
1.10901	-221.817
0.269902	-11.4975
0.952352	-177.753
0.229584	46.6571
0.941976	15.0596
0.28927	-88.6679
0.304378	16.847
1.19913	-242.828
1.24631	-124.889
0.360051	39.4928
1.24587	238.169
0.762553	167.482
1.70417	-74.5057
0.865018	-58.8135
1.54746	-90.4212
1.72309	-150.847
1.76829	-19.2569
1.77992	-12.6747
1.78292	-109.706
0.885283	-33.5183
0.654267	-32.3998
0.594813	169.11
0.956297	201.933
0.260191	150.16
0.264129	-49.9417
1.19164	-339.862
1.24726	195.708
0.536866	-63.2082
1.26259	-89.1951
1.26627	-305.857
0.368815	104.86
1.03625	159.719
1.20802	5.02499
0.496874	186.58
0.354085	148.394
1.25566	-57.8882
1.48686	-128.676
1.54636	-98.5922
1.56167	2.66743
1.56561	-68.974
1.56663	263.154
1.56689	-80.5847
1.56695	8.49831
1.56697	-46.9701
1.56698	-7.91151
0.668573	43.7775
0.437359	8.0793
0.377854	46.2545
1.01212	90.4215
0.316028	24.3995
0.319969	-48.3715
1.20601	-148.396
1.25096	-179.216
1.26252	-172.133
0.367098	94.687
0.343296	92.245
0.343034	242.727
0.137925	-70.4773
0.0786171	-124.67
0.0633535	211.784
0.647987	57.7326
0.64797	139.529
0.647965	75.7276
0.957918	-84.514
1.18812	-134.26
1.24737	-55.243
1.26261	-248.732
0.368134	-22.0283
1.03633	-111.325
1.2083	-236.234
1.25256	112.799
0.365546	37.057
0.137264	228.315
1.47255	10.4962
1.70376	-42.3628
1.40756	59.3964
1.11061	-49.2154
1.12573	-63.17
1.12962	-24.5981
1.13062	32.6034
1.13088	-7.11961
1.13095	15.7742
1.85767	63.7682
1.86161	-110.043
1.86262	-122.599
1.86288	-108.526
1.86295	-134.064
1.86297	185.662
0.964569	26.4441
0.733357	-16.6661
0.673852	29.5403
0.935943	-123.341
1.16715	-205.85
1.22666	158.443
1.24197	-67.2917
1.24591	57.9344
1.24693	42.9681
1.24719	-174.685
0.551094	-126.075
0.364165	-62.8206
0.132968	54.2412
0.0734672	7.83724
0.058154	160.826
1.54772	32.5761
0.879512	4.5424
1.60595	-108.963
1.7929	150.731
1.84102	-113.594
1.8534	-130.268
1.85659	-139.209
1.85741	113.282
0.959214	50.3693
0.728054	11.1297
0.668563	45.851
0.653252	-2.58272
0.952618	-65.8202
0.284414	-22.9594
0.423053	4.27269
0.422039	71.52
0.421778	23.589
0.421711	-93.205
0.421694	35.536
0.117744	13.5563
0.593659	56.5111
0.593658	113.889
0.971895	-187.08
1.19172	8.75429
1.24829	-93.277
0.364449	99.9084
0.346958	83.5898
0.346958	133.249
0.346958	-48.663
0.346958	-188.807
1.03539	135.372
0.323979	123.029
1.20806	-1.76176
1.2525	-118.602
1.26394	-128.871
0.552528	111.269
1.26688	-166.14
1.26764	-138.145
0.556229	39.9921
0.369428	21.3938
1.03667	39.0025
1.20839	-93.2729
0.496982	46.2126
0.35418	177.345
1.25563	-29.4222
1.48685	-144.613
1.54635	-40.1475
1.56167	-58.1928
1.56561	-40.3786
1.56662	206.617
0.668478	46.2089
0.437331	-46.6664
0.95264	-137.465
0.228872	137.556
0.941006	-43.337
1.12428	-218.026
0.472362	42.5011
1.23094	-132.366
1.24308	-191.636
0.546979	-99.8639
1.26151	1.87043
1.26231	-108.004
0.364118	82.183
0.132957	202.014
0.0734655	39.1973
0.0581547	-27.8784
0.0542142	2.44154
0.0532001	119.876
0.0529392	27.0296
1.55293	-53.3261
1.78313	-114.599
0.943972	-51.2169
0.728006	157.619
0.0166654	103.819
1.5709	-129.891
1.7878	102.625
1.84363	-165.961
1.858	-176.821
0.963289	220.747
0.733027	43.6453
0.673767	33.8449
0.0376237	115.169
0.658532	1.39459
0.951274	186.507
0.284083	84.5942
0.112374	-0.027
0.595108	28.3453
0.0721085	-59.6003
0.0607354	-45.7157
0.956212	105.372
0.288269	35.9094
0.116367	77.5271
0.0721257	65.6398
1.53668	-90.5334
0.869225	-120.179
1.59585	-53.1592
0.884456	-67.5549
0.70137	0.768557
1.55265	-37.461
1.77174	-60.297
1.82813	9.1043
0.229701	-149.333
0.0572154	-22.6799
0.0159283	36.6309
0.710013	-54.9713
0.896842	-30.7073
0.944924	-95.1342
0.957299	-102.908
0.960483	-57.8545
0.476555	-24.3741
1.18878	-97.9489
0.362485	37.5161
0.319772	-18.9701
0.403046	-36.6571
0.58907	-3.97627
0.636946	21.6657
0.249137	-5.80367
0.421224	67.3251
0.593749	-8.23072
0.63815	-82.5911
0.649577	112.618
0.0620413	-128.186
0.0620956	84.4315
0.836294	-87.8975
0.244758	163.693
0.418053	228.328
0.418053	-74.3977
0.418053	-114.579
2.10971	-111.15
2.16463	-92.4092
2.16714	-55.4949
2.16725	-1.97761
0.965115	81.2708
0.910197	220.106
0.415424	-220.672
0.415424	-162.833
0.415424	-33.8147
0.415424	-6.06883
0.415424	60.8957
0.415424	-27.8069
0.415424	32.985
0.907688	99.5405
2.10972	-222.695
2.16463	-133.057
2.16714	-19.5458
2.16725	7.51958
2.16726	118.831
2.16726	-117.797
2.16726	-89.2305
0.965115	-27.7159
0.910197	113.677
0.907688	227.168
0.907573	248.694
0.907568	232.571
1.6202	91.7204
1.67512	-169.514
1.67762	-69.9616
1.67774	29.3119
0.352119	86.7821
1.67774	-9.07011
1.67774	-173.87
1.67774	-79.7365
1.67774	-84.9365
0.4756	-85.4341
2.05217	-148.417
2.10708	-109.982
2.10959	230.571
2.10971	-2.28655
0.907568	-149.233
2.05479	-244.624
0.905059	-111.658
0.852535	21.6433
0.850135	164.807
0.850026	167.042
1.62282	112.587
1.67523	-41.8552
0.349615	27.2569
1.67763	-76.8101
0.35201	66.2905
1.67774	-139.677
1.67774	-145.951
1.67774	-78.5397
0.4756	68.8702
0.850021	89.5824
0.420682	130.375
1.62032	-111.118
1.67512	-209.639
0.852644	-72.7909
0.907562	-42.1956
0.781583	56.5618
2.10971	-34.0768
0.907682	-61.5542
2.05491	-32.8623
0.905179	51.2876
0.365638	257.817
0.363134	197.748
0.36302	117.256
0.363014	-26.6764
0.910082	-166.275
2.10983	-248.594
0.962491	-163.02
2.11222	-118.706
2.16475	129.872
2.16715	-114.882
2.16725	-34.0691
2.16726	-78.9987
0.965115	-0.975343
0.910197	334.275
1.61757	111.498
1.67249	187.476
1.675	22.2973
1.67511	-115.169
1.67512	-162.757
1.67512	-204.812
1.67512	-75.2615
0.472971	-17.7608
0.418053	79.0377
0.415544	245.445
0.907568	171.52
0.417938	198.991
0.417933	5.74163
0.417932	-100.916
0.417932	-116.042
2.10972	-244.164
0.962487	-208.529
0.363134	-64.9491
0.363134	47.828
0.363134	121.48
0.363134	201.624
0.910077	205.007
0.415544	220.53
2.10983	-224.499
2.16464	-251.96
2.16714	40.9589
2.16725	54.7199
0.841634	230.311
0.965115	311.955
2.11234	-201.152
2.16475	-169.367
0.965001	-78.2673
1.56276	236.478
0.291953	27.8196
0.294457	-135.426
0.294571	1.0614
0.294577	128.615
0.472971	-362.539
0.420561	-168.329
0.905059	216.379
1.62031	-20.1293
0.472976	-145.632
1.62271	-104.079
1.67523	-9.79853
0.34961	73.1132
0.34961	-66.8434
0.34961	-100.822
0.34961	-22.6985
0.34961	-2.75685
0.475485	-11.7369
1.62282	-66.4384
0.297201	-135.506
1.67524	-24.065
1.67763	-105.856
1.67774	-106.871
0.352119	-131.633
1.67774	-99.2417
1.67774	124.286
1.67774	74.2273
0.4756	207.088
0.420682	201.668
2.10708	-45.0209
2.162	-160.211
2.16451	-160.924
2.16463	-108.344
2.16463	2.45852
2.16463	-47.4868
2.16463	-52.5989
2.16463	16.2133
0.591888	6.35115
0.150754	2.37981
1.03302	-31.2059
0.651559	-243.517
0.986322	63.3017
0.104053	-17.9938
0.104053	-280.568
1.126	-162.825
0.243732	315.032
0.243732	-12.215
1.18428	-175.692
0.302013	2.11397
0.302013	76.7539
0.302013	126.479
0.302013	-249.71
1.2086	-239.058
0.32633	33.7523
0.416433	106.627
0.465836	126.534
0.465836	51.2159
0.888216	16.6196
0.00594712	-50.3287
0.00594712	37.45
1.08507	-267.671
0.202798	-57.1148
1.1672	-165.235
0.39916	3.51067
0.483109	158.893
0.483109	69.8624
0.881009	34.6177
1.08206	-157.713
1.16595	-65.5476
1.20095	-111.172
1.21555	-22.954
1.22165	-53.5077
0.421877	124.025
0.0881748	222.481
0.794094	235.975
1.59641	-72.7289
1.93117	-256.233
2.07085	-157.526
1.32782	64.9677
2.26837	-117.898
1.49037	4.04541
1.16575	136.703
1.03031	197.183
0.973794	147.002
0.950214	90.5275
0.940375	90.657
0.93627	95.5335
0.934557	7.3134
0.933842	15.0254
0.933544	2.06406
0.692941	-34.7723
1.00346	-199.818
1.13303	-247.696
0.250885	-18.682
1.18721	-9.1669
0.304997	37.7117
1.20982	10.6879
0.416921	173.05
0.465326	299.046
0.88842	-4.08386
1.08514	-231.914
0.202883	-87.2652
0.202886	-9.55836
1.16724	-133.179
0.28497	-98.9711
1.20149	-36.8679
0.413465	186.97
0.468803	204.787
0.468803	147.984
0.886978	17.5175
0.00470913	-9.26525
0.00470918	-3.58747
0.0047092	21.1786
0.0047092	61.1046
0.00470921	-39.6697
1.08455	-263.002
0.364673	-206.758
0.517595	2.57353
0.517595	174.417
0.0643068	55.5203
0.817962	-9.4775
0.741292	-191.303
1.02376	-165.885
1.14162	-72.144
1.1908	-92.1069
0.409006	82.8037
0.473263	215.2
0.885117	77.8768
1.08377	12.906
0.364349	39.3677
0.0641716	224.705
0.0610768	24.8382
0.113336	38.065
0.135142	65.413
1.81972	-160.376
2.15449	-276.629
1.49185	-39.2348
0.618682	30.0155
2.02678	-45.7186
2.24618	-90.3192
2.33773	1.91315
2.37592	103.23
2.39186	-190.084
1.5962	-80.7278
1.26421	65.8453
0.416575	10.665
0.749754	-86.0008
0.00600646	-28.5661
1.02729	75.5249
0.202822	135.569
1.1431	96.5555
0.284943	31.0115
1.19141	-127.092
0.319208	-27.3399
1.21158	-22.4288
1.21579	-147.814
0.337718	-78.847
0.33947	123.587
1.2235	78.1126
0.341959	70.0266
0.342264	222.635
1.22527	76.4845
1.22557	-205.968
0.343431	-150.55
1.22583	-77.4875
0.343612	-101.215
0.423621	-14.7878
0.458625	44.0582
0.458616	151.283
0.458612	37.1888
0.458611	-72.5808
0.45861	-1.92213
0.891231	-44.1853
0.00896222	-95.2267
1.08632	-66.7614
0.204056	233.834
1.16773	232.154
0.285458	106.1
1.20169	-26.1296
1.21586	0.975112
1.22178	-79.6449
0.421931	14.6764
0.460338	119.245
0.0881973	27.1349
0.794071	-1.78869
0.75126	-166.16
0.131008	-132.227
0.131008	24.9984
1.02792	-34.03
1.14336	-133.598
1.19152	-152.368
1.21162	-127.079
1.22001	-119.569
0.421192	-28.3624
0.0878891	141.31
0.0511808	225.551
0.109207	205.946
1.79379	-167.377
2.12855	-147.85
1.46592	-72.6267
1.99175	94.9196
2.21115	-164.659
2.30269	6.12429
2.34089	-69.0357
2.35683	7.44453
1.56117	118.414
0.703109	208.328
0.713211	206.921
0.0848864	202.933
0.417891	37.6877
0.556836	-81.0207
0.187502	-45.3995
0.304237	-182.29
0.246043	-11.3567
0.107522	107.618
0.979924	92.3066
0.155453	109.999
0.321019	148.032
1.33945	-120.249
1.66415	-179.703
1.79963	106.413
1.85616	-133.161
1.87974	-108.37
1.88958	-45.9507
1.89369	-122.277
1.8954	-37.9659
1.09381	153.346
0.759342	179.246
0.626197	111.12
0.116518	83.54
0.975739	-2.44463
0.151699	-8.05443
0.175995	60.1799
0.186133	90.1971
1.15602	-119.913
0.277979	-69.213
0.279744	-50.1811
0.280481	10.8084
0.280788	218.633
0.280916	199.194
1.19974	-71.5777
1.215	-111.411
0.419049	-73.3733
0.889254	47.7672
1.08545	-1.69509
1.16731	-159.92
1.20146	-193.291
1.21571	-194.711
0.419348	-88.9364
0.462867	23.7763
0.0871196	55.9988
0.795127	42.9123
0.0515018	135.787
0.109351	27.1703
0.133488	-14.3725
1.81806	-272.325
1.35051	-193.269
1.95773	-145.752
1.40878	-40.0056
0.536587	113.959
1.18981	228.354
1.89655	-25.1383
2.19144	-178.638
2.31448	-188.893
1.56351	-16.4011
1.25016	48.7898
0.430216	67.9009
0.321311	123.074
0.26676	120.301
0.146206	210.532
0.713301	224.689
0.0268483	-4.06489
0.89962	51.8762
0.895657	269.223
0.707221	-3.71995
1.00789	122.351
0.331035	64.9981
0.0486179	216.857
0.06922	129.005
0.683925	-22.1061
0.19586	4.20622
0.00778346	63.9772
1.69071	-67.7965
1.22247	-93.49
1.82941	-129.756
2.08266	56.4726
2.18832	-52.5719
1.4301	69.7619
0.6328	126.148
2.00101	-117.023
1.40146	-74.6889
1.1513	51.6173
0.497828	136.372
0.280061	77.2374
0.236509	58.7244
0.218337	155.282
0.983902	63.8044
0.315096	-62.0969
0.838351	-209.71
0.0363352	-22.33
1.06426	73.2662
1.15536	-55.5126
0.276252	-83.2101
0.277572	98.6523
0.395537	240.995
0.878947	161.179
1.08065	-136.76
0.19893	-138.178
1.16536	-70.7796
1.20047	-147.18
0.412812	-122.705
0.469226	49.9814
0.469131	77.6067
0.469091	8.8149
0.886841	-76.8995
1.08448	-108.193
0.364626	-56.5261
0.866583	-38.7677
1.07602	-95.1645
1.16341	-178.635
0.397562	-61.7275
0.880325	-29.3222
0.279445	29.9123
0.0287286	224.59
0.0758821	-87.3949
0.119531	260.856
1.36296	29.4033
0.940039	-94.5201
2.15706	-36.652
2.29674	33.2848
2.35502	6.52586
1.57702	132.652
0.702354	235.437
2.06232	-95.8927
1.18322	78.5886
2.26481	-38.8707
1.38386	69.7404
1.38441	-134.779
2.34985	-187.943
2.38455	-147.05
1.59671	145.159
0.714674	362.983
2.07053	-30.9922
2.26814	-148.072
1.54828	-76.6632
2.05023	-115.464
2.25967	-128.687
1.54474	9.15809
1.24644	331.86
1.12197	287.76
1.07004	166.251
1.04837	64.7531
0.1662	61.85
0.636072	-1.49989
0.237155	-47.1963
0.97986	-99.7746
1.11953	-146.7
0.241036	-119.621
1.18158	-168.021
1.2059	-140.82
1.21604	-144.541
0.33535	-10.6915
1.22185	5.91876
0.421306	41.382
0.460306	131.215
0.890249	52.3756
1.08564	-48.1002
0.203646	71.6431
1.16744	9.83531
1.20146	11.7308
1.21565	-101.267
0.419261	-37.0103
0.086969	237.151
1.5975	-30.0116
1.1299	1.12467
1.73711	175.749
1.99047	-205.272
1.29387	-109.513
1.00321	-75.1993
1.68425	-118.89
1.96841	-103.782
1.28466	-7.18964
0.999371	67.7167
0.546562	64.6755
0.216669	115.673
0.942512	59.4303
1.05805	-64.4831
0.225453	-1.30163
1.15593	-58.4367
0.294386	247.544
0.303033	175.003
1.20542	21.4715
1.21381	-116.105
0.335149	57.9528
1.22092	171.114
0.340156	28.5492
1.22389	13.4913
0.422183	53.9462
0.889987	41.4108
1.08518	-123.991
0.364307	-80.9259
0.0635258	15.3995
1.62043	-120.461
1.95493	28.0651
2.0945	-50.5494
2.15273	-55.7599
2.17703	87.1139
2.18717	-53.8264
2.1914	-26.2626
2.19317	9.59571
1.39159	111.195
1.05713	51.9767
0.917583	103.777
0.859355	95.1415
0.699726	157.195
0.179811	132.092
0.678162	30.9793
0.789486	-69.6753
1.03373	-64.737
0.161603	-38.1446
1.14578	-54.9826
1.18831	-81.7582
1.20605	29.0313
1.21345	-57.1557
0.414228	44.7499
1.26612	-5.06
1.59912	-117.226
0.935752	-16.3109
1.46128	-36.3067
1.68055	-155.093
1.13175	37.4671
1.3032	64.4897
1.80893	64.1029
2.01994	87.8434
1.30567	100.334
1.00764	-71.5929
0.883292	-92.5898
0.662148	42.8332
0.168235	77.4682
0.99074	19.5722
1.1062	-30.9923
1.15437	-93.5499
0.293749	110.379
1.19612	106.862
1.2045	-64.818
1.208	10.0617
1.20946	-16.2714
0.466084	-123.434
0.797078	-140.329
0.935185	-111.917
0.992809	-5.64808
1.01685	30.2221
1.02689	0.723691
0.228758	130.072
0.698055	-7.6835
0.0915547	30.3931
0.640807	-48.7059
0.0676682	59.6673
0.171472	98.0753
0.271253	-22.1671
0.312887	-16.8085
1.19576	-27.1405
0.393706	-22.6183
0.471191	86.4267
0.463943	86.5912
0.885981	28.6671
1.08111	24.3709
1.16253	-3.68409
1.1965	-25.0077
0.408359	-136.663
0.881823	-227.258
0.799734	-194.646
0.330923	-86.509
0.937625	-19.4228
0.388457	64.118
0.961631	-22.4343
1.20079	-54.8389
0.498261	16.2758
0.205134	40.0878
0.88514	-30.3732
1.16887	-36.6409
0.484944	77.5349
0.199577	116.948
0.0779305	85.5917
0.68527	0.443855
0.055336	-11.4703
0.64169	13.8684
0.190897	77.4423
0.982204	-4.41202
1.10355	-87.2137
1.15419	-54.6375
1.17531	-69.317
0.381815	18.9774
1.28204	-151.938
1.60815	-88.5464
1.74422	-52.7277
1.801	33.6871
1.82469	-21.1152
1.83457	47.3394
1.83869	0.192966
1.84041	34.206
1.84113	81.0054
1.84143	-231.13
1.03924	-84.6843
0.704534	-27.5366
0.564877	24.1203
0.506605	79.0722
0.482291	165.38
0.472146	251.853
0.467913	177.582
0.466147	110.387
0.46541	-46.7398
0.465103	-47.859
0.464975	-24.2711
0.464921	25.5489
0.888575	-33.109
1.08519	-66.075
0.36492	-83.0595
0.8667	-188.656
1.07607	-236.23
1.16342	-169.852
0.281178	-61.9751
0.281187	71.5017
1.19991	-15.8349
0.317641	71.6082
1.21512	95.1091
1.22146	90.8288
1.22411	13.4338
1.22522	-121.967
0.342949	-61.2503
1.22568	-25.9271
0.343411	58.2247
0.343411	145.051
0.343411	213.34
1.22587	-8.74134
0.42364	-112.085
0.458629	-114.638
0.0889104	-71.8408
0.793358	-67.4518
0.793358	29.8468
0.751558	-53.6094
1.02805	-106.871
0.341097	75.2655
0.856782	187.53
1.07195	-27.0276
0.189682	-50.9169
1.16173	-29.0804
1.19919	-135.209
1.21482	-150.843
0.419028	-129.331
0.0869861	76.3232
0.0515576	136.047
0.109365	17.2578
0.133484	138.301
0.143548	204.862
0.147747	157.447
0.1495	90.5565
0.150231	-19.5859
0.150536	143.013
0.150663	52.8846
0.150716	84.3339
1.8353	-127.207
2.17006	-4.78603
2.30974	-25.0921
1.56571	20.1455
2.05757	-127.008
1.01936	75.8933
0.578246	-45.552
0.224058	-162.532
0.40908	-106.425
0.305131	-97.276
0.261758	-57.0078
0.243661	48.5378
0.23611	92.3624
0.232959	95.7689
0.231645	88.3112
0.231096	98.8343
0.985932	-70.4808
1.12561	-153.908
0.243569	-72.0734
0.243665	-3.95804
0.243705	10.0639
1.18425	-102.705
1.20857	-161.081
0.326318	-18.3012
0.326325	55.9387
0.416428	199.8
0.465838	177.581
0.888214	-0.915628
1.08506	-93.1308
1.1672	-121.874
0.399158	-88.2788
0.881007	-52.3919
1.08206	-103.941
0.19979	-8.73612
0.363633	87.3313
0.0638723	190.421
0.0612022	23.2585
0.113389	-66.6786
1.79797	-137.166
2.13273	-129.59
2.27241	-45.7436
2.33069	81.0725
2.35501	-14.5836
1.56284	8.77749
1.23231	32.7468
0.371821	118.446
1.91849	-69.9977
1.3934	102.699
1.1743	25.6433
0.501194	17.8971
0.0298532	35.9399
0.6355	-87.6676
0.888205	-9.92959
0.993645	-113.113
0.202793	91.3722
0.240936	179.574
0.256851	34.019
0.380802	3.2354
0.494826	0.895822
0.873349	-219.285
1.07609	-120.509
1.16069	-93.8295
0.281189	75.7331
1.19875	35.3557
0.317641	140.576
1.21464	-173.374
0.41847	-61.5377
0.463316	109.186
0.889066	5.14823
0.00699843	64.3736
1.08542	-82.1512
1.16727	-31.5615
0.285081	-22.668
1.2015	-97.3021
1.21575	26.2024
0.333514	34.2559
0.333529	54.7573
1.22174	2.68976
0.33948	28.7743
0.339483	189.666
1.22423	82.009
1.22527	-94.996
1.2257	-150.015
0.343431	-89.1967
1.22588	-60.8719
1.22596	-25.7674
0.423674	38.7827
0.458594	148.018
0.458594	149.187
0.891237	-152.351
1.08633	-139.686
0.204058	-43.5328
1.16773	-104.878
0.285459	12.2941
1.20169	123.599
0.319423	155.797
0.413551	-72.0973
0.468718	-28.3309
0.887013	-7.91099
0.00474465	10.2279
1.08456	-196.259
0.202296	-11.3696
1.16699	139.094
0.399072	262.072
0.0786597	147.655
0.0550317	161.717
0.691498	-31.5129
1.00299	-186.503
0.681595	-193.574
1.01636	-95.546
1.15604	135.073
1.21432	85.8887
0.436323	84.9147
0.914019	-123.909
1.11334	36.4978
1.1965	-37.1376
1.2312	-50.1577
1.24568	60.0563
0.449408	59.8915
0.117166	52.534
0.89507	134.166
0.151429	113.906
0.209271	29.5662
0.233405	29.2747
1.1699	21.397
0.390217	3.84293
0.867207	-77.9155
0.263918	-82.1482
0.608281	-32.9837
0.824579	-139.338
0.0534876	-55.4715
0.0517345	71.931
0.051003	326.086
1.061	-35.5849
1.15685	-110.15
1.19685	-118.094
1.21354	-24.4601
0.331574	22.9704
0.418493	167.783
0.0866357	225.048
0.750481	4.25585
1.02747	-188.641
0.656984	-202.1
0.461456	-56.1058
1.67843	-83.0776
1.08271	72.4772
1.20226	57.4521
1.25215	85.2001
1.47176	255.405
1.99758	-102.152
2.21698	-34.859
2.30852	-43.8978
2.34672	-81.6004
1.56035	51.3938
1.23223	89.9269
0.370778	147.616
1.11614	-71.9708
1.05902	88.9082
1.03518	-277.578
0.640712	-232.255
0.231612	-80.219
0.981796	-78.8305
1.11996	-93.6473
1.17761	-77.8764
1.20167	-41.64
1.2117	-68.5749
0.333584	-34.0069
0.335316	76.4034
0.419459	46.4724
0.0864437	29.8553
0.795103	2.47875
0.794801	14.9438
0.75083	-230.456
0.131313	-198.399
0.13126	154.514
0.131238	104.411
0.131229	-77.774
0.131225	-113.86
1.02783	-280.192
0.145563	-134.537
0.145563	145.036
0.145564	31.247
0.341008	-2.31
0.856745	-103.871
1.07193	-152.435
0.35941	-42.5208
0.864423	-65.0657
1.07514	-29.2026
1.16306	-32.6616
0.280791	43.8139
0.397431	129.7
0.0779749	217.844
1.60661	-190.658
1.94137	47.8341
2.08105	13.41
2.13933	-63.3734
2.16365	170.904
2.17379	-90.8242
2.17803	-71.2012
2.17979	55.7577
2.18053	-53.2752
1.37852	16.7974
1.04389	73.9948
0.904265	116.065
0.846006	112.549
0.0970301	218.946
0.954991	162.891
0.944848	-20.6902
0.940616	-106.417
0.93885	-1.45883
0.938114	54.304
0.937806	62.1695
0.691159	-18.7734
1.00272	-99.8316
1.13271	-75.3455
1.18695	-160.987
1.20959	-65.9199
0.416716	40.8554
0.888206	-26.387
1.08493	-76.2292
0.364705	18.2144
1.31975	-26.7186
1.65446	-23.7532
1.79411	-18.193
1.85239	54.9289
1.07439	100.39
1.55208	-64.6505
0.949085	13.7839
1.4998	-78.701
0.92727	-28.2304
0.688384	3.50977
0.58871	78.4034
0.00695452	183.698
0.66997	120.063
0.150102	58.3672
0.690578	111.134
0.673225	221.942
0.665984	88.8705
0.662963	-55.4376
0.661703	-124.044
0.0036523	-135.713
0.87809	-115.883
0.877871	85.9363
0.877779	219.096
0.716295	-1.69573
1.01329	-104.592
1.13722	-165.344
1.18892	-203.399
0.408185	-105.109
0.0824236	-32.4825
0.748813	-7.64195
0.22455	-43.8264
1.45999	16.7658
1.79474	-56.4424
1.93441	-37.8168
1.19038	77.1516
1.68224	-10.3767
1.88747	4.73102
1.97311	-10.0849
2.00883	-23.5274
2.02374	-1.32934
2.02996	-44.0404
1.23025	25.7291
0.896566	15.6946
0.757339	24.6878
0.708495	80.4781
0.951986	8.0166
1.05358	-43.3615
1.09597	-31.1795
0.271796	59.9648
0.730618	-90.0631
0.48859	-216.751
0.81324	-27.3275
0.146386	207.219
0.670456	-70.2769
0.889123	-112.818
0.178048	49.6099
0.683667	9.3548
0.0923222	44.4193
0.154415	73.7893
0.257365	185.534
0.300321	272.923
1.18997	118.693
0.325624	36.1409
1.21097	-139.401
1.21226	-88.523
1.21279	-173.636
0.338003	-64.0147
1.2205	-3.21614
0.341347	-17.604
1.22371	76.8854
1.22375	-77.5591
1.22376	-80.726
1.22377	3.51744
0.459508	67.5623
0.793728	-54.663
0.93318	114.827
0.991367	-51.9607
1.01564	-111.384
1.02577	-75.6508
0.227689	27.3085
0.105311	127.596
0.18527	235.279
0.149492	154.234
0.513142	83.3137
0.789624	-35.6126
0.904986	44.2309
0.150808	62.7896
0.163871	-17.9307
0.507142	-101.75
0.787121	-114.735
0.903941	-153.231
0.952684	-178.866
0.17071	-39.1765
0.572616	154.758
0.016624	199.311
1.64323	-58.7099
1.95381	-68.8193
2.08339	-104.033
2.13746	-126.256
2.16002	-85.6179
1.36712	104.552
1.8386	-24.9017
2.03532	-103.106
1.31509	25.0844
1.01458	74.3085
0.889188	249.395
0.659255	0.350567
0.134902	-137.674
0.083883	-44.0093
0.17517	4.80499
1.00512	33.1143
0.641371	47.9977
0.157928	30.4531
0.0437867	184.857
0.674361	-272.443
0.171693	-161.414
0.0380433	-132.784
0.898482	246.403
0.889374	140.436
0.0946174	117.758
0.131132	72.6165
1.0096	142.809
1.81033	-284.392
1.34212	-230.828
1.14676	-147.143
1.06524	-96.6286
1.03123	-19.2126
0.164197	335.82
0.170554	266.434
1.03863	74.1169
1.03271	89.8386
0.649218	-71.0087
0.982874	-253.292
1.12209	-272.241
0.377867	-116.015
0.501931	-9.00966
0.0698118	129.876
0.811426	232.374
0.0587235	145.301
0.940562	69.0882
0.940383	-39.3671
0.690138	-207.201
1.00234	-260.047
1.13261	-238.431
0.384652	-172.233
0.874881	-60.4033
0.00731328	34.1907
0.00728203	123.969
0.007269	171.561
1.07955	104.388
0.197283	7.08595
0.197285	71.9638
1.1649	13.1614
1.20051	-134.031
1.21537	-205.959
0.333102	-115.289
0.333102	148.731
0.419258	211.919
0.889395	172
1.08556	-68.7342
1.16741	-84.2973
1.20156	-100.134
0.413495	-17.7608
0.0846771	90.2543
0.0525211	162.081
0.109767	170.344
1.79435	-79.4434
2.12911	-120.813
1.46648	0.432581
1.99231	-61.7876
2.21171	-98.0537
2.30325	58.7347
2.34145	-196.631
2.35739	-130.631
1.56173	-12.3254
1.22974	-22.8591
1.09122	192.927
1.03342	174.731
1.0093	131.207
0.99924	197.846
0.995041	43.0463
0.136658	-53.6204
0.655688	-140.699
0.18398	-163.826
0.789474	-172.628
0.239802	-54.0057
0.640715	179.154
0.814517	118.156
1.05358	-154.471
1.15333	-237.689
0.392643	-203.854
0.0752461	-48.2442
0.057187	49.4575
0.938725	87.6545
0.111713	-69.0126
0.134769	38.013
0.144389	124.816
0.148403	42.9589
0.150078	83.2477
1.83435	-160.156
1.36668	-89.1966
1.97385	-1.38072
1.42488	41.5239
1.99814	-64.3392
2.23733	-13.4721
1.35576	105.255
1.35605	234.641
1.53581	84.3177
2.045	-139.819
1.45515	-271.925
0.572999	-79.5768
1.20915	-20.7932
1.10646	-120.403
1.06361	-144.81
1.04574	-100.893
1.03828	39.2807
1.03516	-55.4402
0.649366	-138.734
0.181796	106.937
0.0132972	70.0322
0.707613	-55.4147
0.206099	-189.521
0.674871	-105.437
0.00185799	-78.9319
0.713143	-111.583
1.01148	-113.388
0.333642	113.944
0.050817	7.6551
1.63322	-39.1972
1.96776	-115.167
1.30503	12.9619
1.83082	34.1999
1.06656	321.501
1.3659	220.557
1.12268	45.1262
1.82351	-219.287
2.11592	-190.06
1.43562	-26.0697
1.15177	62.8976
1.03333	116.343
0.983913	313.613
0.150882	225.097
1.01253	47.1696
1.00393	-0.122003
1.00034	-58.1335
0.663698	-108.025
0.989889	-87.226
1.12599	-190.633
0.24522	-83.3297
0.245845	1.98926
1.1849	-46.313
1.2086	-123.092
0.416171	15.6048
0.465837	101.512
0.888107	66.8672
0.00594684	18.2992
0.00599224	177.206
1.08507	141.396
1.16718	-48.4852
1.20145	-162.098
1.21574	-157.194
1.22171	-191.135
0.339457	-30.4241
1.22421	144.93
0.42294	-45.0837
0.0886106	263.683
0.0508876	191.568
0.109093	-20.1852
0.133379	-67.387
0.143512	-79.4378
0.14774	-18.4327
0.149504	13.1683
0.150241	8.48468
0.150548	69.9998
1.83512	-120.213
2.16988	-226.382
2.30956	95.1228
2.36784	92.3565
2.39216	-22.9591
2.4023	31.2809
2.40654	-223.243
2.4083	-18.6405
1.60673	1.74075
1.27227	48.3287
1.13272	19.3019
1.07449	81.1874
1.0502	150.88
0.634255	-82.9826
0.968965	-180.774
0.306309	-103.771
0.565823	87.6361
0.0399543	188.353
0.726901	-64.2404
1.01353	-182.578
1.13312	-263.442
1.18302	-297.719
0.401532	-177.02
0.0754561	170.617
1.6049	-135.713
1.93789	-235.335
2.07684	-118.5
2.13481	-132.721
1.35669	1.37539
1.03202	77.4943
1.69886	1.98132
1.9771	-48.9673
1.29088	37.3041
1.00456	60.0269
0.885092	-106.827
0.835245	-0.996427
0.814446	-18.9758
0.805768	-52.2227
0.0595535	203.96
0.938201	284.189
0.93669	73.1203
0.691123	-43.6799
1.0022	-68.8273
1.132	-17.0912
0.250357	103.974
0.25062	61.5684
1.18705	-46.8947
1.20964	-168.119
1.21907	-179.23
0.336912	-163.227
0.420802	5.89443
0.889993	73.0801
1.08576	218.771
1.16745	5.37122
0.285223	24.0495
1.20157	211.008
0.413483	63.8011
0.0846532	-192.543
0.0525501	121.508
0.411311	120.75
0.860392	32.189
0.03777	-37.9172
0.03777	-105.371
0.03777	-171.826
0.860392	-169.832
0.03777	-43.3604
1.72528	-118.269
2.08477	-24.9522
2.23419	56.4178
2.2963	144.277
2.32211	-203.272
2.33284	-22.6604
1.47241	29.5862
1.11478	30.2205
0.966126	20.3499
0.90434	59.1329
0.878659	151.022
0.884393	167.835
1.24388	61.7306
0.356394	-0.181531
0.36083	28.4631
1.40841	-127.72
0.512095	-139.94
1.47236	-160.394
0.574967	-59.8297
1.49894	-110.933
1.50967	-90.1617
0.61183	-58.0397
0.649562	58.2425
0.248468	158.324
1.15695	79.4971
1.36779	23.3822
1.45542	-75.7461
1.49185	-85.0432
1.50699	-50.9244
0.60888	102.332
0.648445	199.846
0.291572	234.7
1.47146	-85.611
0.966046	-97.1498
0.755974	-58.476
1.53355	100.073
0.783719	10.8493
2.00508	-308.734
1.27452	-133.915
0.438014	61.9917
0.463641	71.0738
0.474292	92.3713
[truncated: 1,859 more rows]

## Sheet: PreInitIntegral
		0uL	12uL	0uL	12uL
		Nex.23	Nex.199
Large		17.867	-43.0922
Reward		6.29174116975816*	-2.00748398342009*
		13.7233	-18.5716
all Re		38.2395	-55.8032
ward		21.435	-54.3684
Rew		8.93962	-24.2729
ard		13.9022	-49.9811
No Re
ward
Reward
No Rewa
rd0L

## Sheet: PreInitSlope
		0uL	12uL	0uL	12uL
		Nex.23	Nex.199
Large		-0.00135721	0.632308
Reward		-0.0254348847982993*	0.0188202015387855*
		-0.0035233	0.152834
all Re		-0.0827375	0.238828
ward		0.0621044	0.29619
Rew		0.277511	0.581651
ard		0.198325	0.59906
No Re
ward
Reward
No Rewa
rd0L

## Sheet: Slope_RAV_Regression
Relative Action Values	Slopes
0.297549	0.76799
0.653253	0.289294
0.653253	0.0169747
0.0581543	0.5275
0.653253	0.415161
0.653253	0.479215
0.653253	-0.57045
0.653253	-1.22753
0.653253	1.38614
0.956558	2.05759
1.18777	2.52825
1.24728	1.92524
0.53587	-0.960938
0.364188	-0.712005
0.34722	1.79567
1.03532	0.86014
0.309638	2.06226
1.02128	-0.919536
0.306025	-0.444735
1.30379	-0.349565
1.535	0.262626
1.59451	0.565298
1.60982	-3.41251
0.715357	1.16446
0.188028	0.138948
0.235403	-1.64309
1.61501	0.2622
0.88858	-1.50709
1.60003	-1.04688
0.884724	-1.4476
0.185509	-0.473271
0.712825	1.14647
0.665447	-0.318026
0.042823	-0.318532
0.0420154	-1.04112
0.657199	0.582902
0.654061	-0.934501
0.653253	-1.01479
0.0579465	0.453842
0.057893	-0.426806
0.653307	0.433623
0.653253	0.092539
0.956544	2.07589
1.18775	1.14433
0.348855	0.374113
0.362538	-0.191972
0.362535	-0.126041
0.132973	0.538826
0.578434	0.315262
0.975814	-0.350872
1.19273	0.00280121
0.350149	1.46573
1.03171	-1.84119
0.320299	-0.221429
0.320299	-0.167446
0.320299	0.860023
0.320299	-0.50633
1.20711	-1.19864
0.353851	0.166365
1.03266	-1.33615
0.321251	-0.0790199
0.321251	-0.385516
0.321251	0.848458
1.20736	1.41445
1.25232	1.4685
1.26389	1.31458
0.368463	-0.128108
1.03642	1.69781
1.20833	1.06115
1.25257	-1.41255
0.54116	-0.953658
1.26395	1.17418
0.36848	-0.755592
0.342928	1.10651
0.13802	0.875207
1.47179	2.24575
0.804601	-0.577257
1.5313	-1.72629
0.819916	1.35303
0.16782	-0.399411
0.183084	-1.04412
0.187013	1.92059
0.188024	-0.478399
1.61475	0.911713
1.79885	-2.16063
0.947824	-0.483693
0.728804	-1.61336
1.57084	-1.46842
0.859693	0.174114
0.85976	-0.793177
1.78787	-1.5378
0.945243	-0.385697
0.233853	1.08286
0.233857	0.349468
0.728404	1.2925
0.672593	-1.34516
1.55663	-0.451043
0.885747	-0.544624
0.17434	1.1329
0.174341	0.395192
1.61149	0.490315
0.900085	0.477899
0.899866	-0.675786
1.61513	1.84872
1.79921	-1.40322
1.84658	-0.470022
1.85877	-0.635475
1.86191	-0.769659
1.86272	-1.29879
0.964522	0.241143
0.645289	-0.998527
0.165042	1.66455
0.224534	0.651306
0.239845	-1.16048
0.243785	-0.232727
1.18641	-0.0417433
0.476013	-0.364866
1.24693	0.0457437
0.363837	-0.705311
0.34731	0.246678
1.03523	1.65492
1.20795	1.68138
1.2524	-1.03967
1.26384	0.141226
0.552504	0.640995
0.552521	-0.0979797
1.26687	1.00153
0.369227	-0.16711
0.342176	0.827157
0.342175	-0.294518
1.03662	1.11406
1.20838	-0.443629
1.25258	1.14058
0.365552	-1.05605
0.137266	1.02663
0.574141	-1.29463
0.574141	0.468782
0.574141	-1.03933
0.574141	-1.43765
0.0785147	0.274019
0.632893	-0.283805
0.0633943	0.420329
0.957907	-1.63735
1.18812	0.0384686
0.348963	-0.54504
0.362445	1.06106
1.0314	-1.16383
1.20703	2.29531
1.25223	2.34045
0.365464	0.975012
1.24435	1.87788
0.577158	-0.0102542
0.405449	0.690227
0.0777383	-0.17781
0.589478	-0.777149
0.0631945	-0.581975
1.17954	0.383072
0.838952	-0.480412
0.880243	-0.371954
0.172726	-0.274541
0.173727	0.940688
1.61108	0.41225
0.899502	-0.0860576
1.61477	1.56886
1.79886	-1.57092
1.84623	3.09137
1.85843	0.165235
1.86156	0.521991
0.963967	0.847937
0.645587	1.99882
0.165185	0.441081
0.224637	0.813458
0.239938	0.431696
0.243875	-0.282063
0.244889	0.624283
0.28904	-1.80964
0.422107	-2.50053
0.42204	-0.198282
0.422022	-0.2125
0.11766	1.17804
0.593743	1.86885
0.593742	0.748991
0.971874	0.628344
1.19171	3.56764
1.24829	1.83082
1.26285	0.0816091
0.368196	-0.086397
1.03635	1.62222
1.20831	0.563904
0.354158	-0.657841
0.134334	0.931626
0.0777596	0.873898
0.0631997	-0.066624
0.0594525	-0.569009
1.55036	0.812612
1.78157	-0.986533
1.84108	0.613331
1.85639	-0.751164
1.86033	2.49089
1.86135	0.72554
0.963205	-0.920451
0.732058	-0.601899
0.67257	1.14316
0.65726	-0.519512
0.65332	-3.48289
0.955527	3.05169
0.245134	0.314282
0.289103	1.408
0.422044	-0.116229
0.421977	-0.340347
0.421959	-1.51256
0.117676	5.35672
0.593727	1.3581
0.971877	1.59248
0.26047	3.44078
0.293311	0.0753058
0.418097	-0.125626
0.418097	1.03613
1.01708	-1.55879
1.20335	1.36777
1.25129	2.32457
1.26362	-0.353423
1.2668	0.408868
1.26762	0.63146
1.26783	1.86777
0.369476	0.0715922
0.138276	0.795641
1.47153	-1.37299
1.70275	-0.10917
1.76225	-0.107377
1.77757	-1.17895
1.78151	0.755831
1.78252	1.48414
1.78279	2.74021
1.78285	0.766834
0.884466	1.34525
0.653256	0.700024
0.593752	-0.295419
0.578438	-0.0421754
0.971871	2.25578
0.264405	-0.55538
0.293309	0.473795
0.417084	-0.966522
0.416823	-0.821815
0.416756	-0.437853
1.01741	0.556428
0.306016	0.290519
1.20343	0.833783
0.492029	-0.511145
1.25131	0.515882
0.539901	0.098184
0.365225	0.00644305
0.346182	-0.939465
0.346182	0.0276609
1.03559	0.213213
0.324179	-0.634809
0.309707	-0.609898
0.401701	-0.229205
0.401701	1.13469
1.0213	0.881532
1.20443	3.7843
1.25157	0.0870415
0.365292	0.018189
1.0356	2.59321
1.20812	1.1401
0.354109	0.558788
0.134321	0.0443235
1.47549	2.12185
0.8083	0.565275
0.153457	1.90622
0.168015	1.00205
0.171761	-0.274188
0.172725	-0.466368
0.712424	-0.337265
0.00126505	-0.986469
0.00132891	0.769176
0.668545	0.605949
1.55558	-0.264781
1.78386	-0.156163
0.944211	-0.990783
1.62652	1.18301
1.80212	0.514457
1.84731	-0.816229
1.13592	-1.68174
0.960558	0.63524
0.732337	0.666977
0.87747	3.71826
0.224798	-0.0064708
0.239914	-0.570762
0.82683	0.240561
0.475017	-0.539248
0.476018	-0.527544
0.476276	0.00224406
1.24719	2.3298
1.2625	-1.6521
1.26644	-0.641643
0.555103	0.647284
0.55512	-0.264282
1.26754	1.49016
0.556138	0.144572
0.55614	-0.136689
0.369404	-0.496423
0.342003	1.17404
1.03666	0.343864
0.309984	-1.69816
0.401424	-0.944448
0.122965	0.293089
0.588442	1.10769
0.973238	1.82787
0.261831	1.23545
0.261831	0.983031
0.293661	0.113195
1.01717	1.75257
0.305761	0.287861
1.20337	-0.738511
1.25129	-0.26194
1.26363	1.22292
0.552218	-0.0735604
1.2668	2.38949
1.26762	2.10987
0.556208	-0.265769
0.556208	-0.166597
0.556208	-0.556304
0.556208	0.197874
0.556208	0.25027
0.369422	0.0256013
1.03667	-0.237652
0.309985	0.344016
1.02137	-1.27156
1.20445	2.06287
0.353166	-0.968738
1.03248	1.02963
0.321075	0.467983
1.20731	2.58508
0.353902	0.817008
0.134268	1.06669
1.47554	-1.00393
1.70676	0.563112
1.05187	-0.703491
1.82279	-0.343325
1.8381	0.290786
0.943639	0.446302
0.246779	-1.63709
0.250523	-0.13188
0.251487	-0.793653
0.251735	-1.30062
0.251798	-0.352131
0.251815	0.774703
1.63143	0.201919
0.920023	-0.366392
0.920025	-1.10253
0.904998	1.21846
1.61645	0.565163
1.79954	-0.684475
1.84667	0.00254083
1.85879	0.180017
1.14739	-0.640493
1.14739	-0.275166
1.86192	-0.199676
0.964316	0.449932
0.252908	0.419744
1.63171	0.198326
1.80347	1.82693
1.84768	-0.150916
0.960651	0.0354079
0.249244	0.490753
0.732365	1.20879
0.0209579	-0.743015
1.57202	0.172556
1.78811	-1.60742
0.945321	-0.511589
0.72842	2.85787
0.672598	-0.8294
0.658232	0.0681138
0.654534	-0.987013
0.653583	0.395572
0.653338	2.18753
0.956473	2.71122
0.245129	-1.31738
0.245145	0.855882
0.245149	0.272646
0.24515	0.214991
1.18777	1.99131
0.476365	-0.0929922
0.476365	1.42567
1.24728	0.495969
0.364188	-0.44918
1.03532	3.38175
1.20804	3.77488
1.25249	5.23974
0.36553	0.276198
0.345877	1.78234
0.137261	-0.511557
0.0785133	-0.854897
0.0633939	0.0956331
1.54642	-0.238031
0.879227	0.730427
0.707519	-1.15937
0.663328	0.100002
0.0441884	0.176471
0.043187	0.326134
0.0429293	1.21543
0.042863	0.163696
0.0428459	1.5163
0.0428415	-0.128491
0.0428404	1.37667
1.5556	-0.456421
0.885481	0.358336
0.174074	0.301393
0.174074	-0.05024
1.61142	0.946287
1.79825	1.51077
1.84633	0.490355
0.960306	0.0316895
0.248898	-0.542483
1.63068	-0.0187897
1.80321	0.856155
1.49191	-0.606974
0.237799	0.498575
0.904989	-0.209725
1.0767	0.0763819
0.901128	-0.562767
0.672855	0.771734
0.614107	-0.127239
0.951513	1.19772
1.17135	1.82506
1.22793	1.64836
1.24249	2.55542
0.347837	0.872962
0.348451	-0.333155
0.34456	-1.42733
1.035	0.381736
0.324596	0.84396
1.20796	0.816328
0.496811	0.341048
1.25247	0.899175
0.365459	-0.858256
1.03558	1.90358
1.20804	1.72489
1.25243	3.09293
1.26385	0.857223
0.368387	0.392166
0.13793	-1.95037
0.0786191	-0.666826
1.53113	-1.8182
0.863919	0.312313
1.59061	1.06351
1.77763	1.66165
0.92736	-0.980318
1.60694	0.129544
1.78183	0.654171
1.82685	1.43843
0.940025	0.80136
0.711793	-0.0620968
0.653055	-0.888351
0.637938	0.317429
0.956609	0.54811
0.249092	-3.62004
1.18779	2.68182
0.347876	-1.18771
0.36253	0.701191
0.362273	1.09715
0.132975	0.797648
0.578366	2.27954
0.578349	-2.83806
0.578345	0.350515
0.975836	6.33067
1.19273	2.35031
1.24855	-0.0642337
0.364515	0.370653
1.0354	2.13523
1.20806	0.440576
0.354094	-1.02489
0.357312	-0.767296
1.03272	1.77059
0.308969	-0.516814
1.30084	1.11048
0.7757	0.710347
1.71832	1.48147
1.77783	0.919498
0.894737	0.506135
1.56587	1.09113
0.840187	-1.00657
0.176717	-1.40686
0.189054	-0.613785
1.6121	0.241842
1.79525	0.804556
1.84239	0.496508
0.235751	1.49531
0.0608858	0.191778
0.167206	-2.41161
1.10901	0.602098
0.269902	0.158093
0.952352	2.37221
0.229584	-0.951905
0.941976	-0.421889
0.28927	1.09951
0.304378	2.42893
1.19913	0.219195
1.24631	-0.261725
0.360051	0.187558
1.24587	0.908293
0.762553	-0.963632
1.70417	1.81004
0.865018	0.601451
1.54746	0.656095
1.72309	-0.725267
1.76829	0.397773
1.77992	1.39044
1.78292	1.21256
0.885283	-0.348076
0.654267	1.40085
0.594813	2.20043
0.956297	-2.31849
0.260191	1.54674
0.264129	0.316143
1.19164	2.22266
1.24726	0.195954
0.536866	1.5957
1.26259	-6.25247
1.26627	2.25382
0.368815	-1.07382
1.03625	-0.585168
1.20802	-0.0541261
0.496874	1.65009
0.354085	-0.966191
1.25566	1.56328
1.48686	0.0657639
1.54636	-1.10559
1.56167	-0.764514
1.56561	0.612929
1.56663	1.06618
1.56689	-0.194048
1.56695	0.455671
1.56697	1.20933
1.56698	0.00998739
0.668573	1.23561
0.437359	-1.09279
0.377854	0.186403
1.01212	-1.19853
0.316028	0.694638
0.319969	-0.274584
1.20601	-0.0469648
1.25096	-0.053446
1.26252	-0.361533
0.367098	-2.90256
0.343296	0.168984
0.343034	0.0214398
0.137925	0.20803
0.0786171	0.935093
0.0633535	-1.65017
0.647987	-1.74391
0.64797	-0.48295
0.647965	-1.48054
0.957918	-0.50531
1.18812	0.584908
1.24737	5.21681
1.26261	3.34837
0.368134	0.759418
1.03633	2.35355
1.2083	2.85833
1.25256	0.458967
0.365546	0.17803
0.137264	2.1721
1.47255	0.375794
1.70376	0.115507
1.40756	-0.132641
1.11061	-0.0137392
1.12573	-0.214335
1.12962	0.303063
1.13062	-0.126005
1.13088	-0.102793
1.13095	-0.628188
1.85767	0.364536
1.86161	-0.237362
1.86262	-0.751851
1.86288	-0.599957
1.86295	-1.57404
1.86297	-0.811888
0.964569	-0.224666
0.733357	-0.930475
0.673852	0.396618
0.935943	-1.24677
1.16715	1.26234
1.22666	-0.248692
1.24197	0.251249
1.24591	0.316045
1.24693	0.0551664
1.24719	0.0418084
0.551094	-0.00440493
0.364165	2.20444
0.132968	1.836
0.0734672	-0.0561185
0.058154	-1.49617
1.54772	0.876247
0.879512	1.11549
1.60595	-2.2808
1.7929	-1.07154
1.84102	-0.19241
1.8534	0.651933
1.85659	0.774495
1.85741	0.311836
0.959214	0.306176
0.728054	-0.739004
0.668563	0.118269
0.653252	0.178664
0.952618	0.602791
0.284414	0.864733
0.423053	-0.148996
0.422039	-1.61959
0.421778	2.49771
0.421711	-2.01659
0.421694	-1.83436
0.117744	-2.22943
0.593659	0.212161
0.593658	-2.77706
0.971895	-0.300677
1.19172	-0.0781726
1.24829	0.486846
0.364449	-0.275449
0.346958	0.893519
0.346958	-0.255935
0.346958	-0.505313
0.346958	0.883216
1.03539	4.19488
0.323979	-0.743516
1.20806	0.0900974
1.2525	0.340907
1.26394	1.95079
0.552528	-3.04436
1.26688	0.842012
1.26764	2.43141
0.556229	-0.369792
0.369428	-1.62383
1.03667	-1.33858
1.20839	1.21639
0.496982	-1.01612
0.35418	-0.115436
1.25563	1.04004
1.48685	-0.297372
1.54635	-0.447403
1.56167	0.311518
1.56561	0.118445
1.56662	-2.16239
0.668478	0.435701
0.437331	0.893219
0.95264	-0.281042
0.228872	-0.550418
0.941006	0.108598
1.12428	3.76899
0.472362	1.15317
1.23094	3.002
1.24308	1.09107
0.546979	0.00996397
1.26151	-1.31598
1.26231	-0.31916
0.364118	-2.12328
0.132957	-1.76722
0.0734655	-2.07294
0.0581547	0.793123
0.0542142	0.0484016
0.0532001	-0.135018
0.0529392	0.0761587
1.55293	-1.19453
1.78313	0.727763
0.943972	0.556255
0.728006	-0.773107
0.0166654	0.983059
1.5709	-0.751498
1.7878	-0.240547
1.84363	-0.623162
1.858	-0.421508
0.963289	-0.725575
0.733027	2.75986
0.673767	-0.33243
0.0376237	2.41941
0.658532	-0.299765
0.951274	-1.17936
0.284083	0.487001
0.112374	1.29911
0.595108	0.779909
0.0721085	1.23336
0.0607354	-1.00018
0.956212	-1.43773
0.288269	0.87311
0.116367	0.646118
0.0721257	0.450467
1.53668	1.2014
0.869225	-0.110628
1.59585	1.15552
0.884456	-0.0630344
0.70137	1.52681
1.55265	0.500933
1.77174	1.04184
1.82813	0.777461
0.229701	0.0977508
0.0572154	-1.08464
0.0159283	-0.239528
0.710013	-0.575454
0.896842	0.72463
0.944924	1.99679
0.957299	-0.0505007
0.960483	4.82036
0.476555	-0.842872
1.18878	1.01714
0.362485	-0.306932
0.319772	-1.16752
0.403046	-2.03999
0.58907	-0.0222203
0.636946	-1.31863
0.249137	0.37074
0.421224	-1.62362
0.593749	0.288738
0.63815	-0.28009
0.649577	0.029773
0.0620413	0.248393
0.0620956	-0.43068
0.836294	-0.339843
0.244758	-0.293468
0.418053	-0.940436
0.418053	0.972779
0.418053	0.203928
2.10971	1.01246
2.16463	1.04535
2.16714	-0.170139
2.16725	1.87358
0.965115	2.14849
0.910197	-1.06017
0.415424	-0.681813
0.415424	0.726755
0.415424	-0.052871
0.415424	-0.226733
0.415424	0.842061
0.415424	0.60743
0.415424	0.13732
0.907688	1.68008
2.10972	1.43449
2.16463	-0.720996
2.16714	-0.117507
2.16725	1.04834
2.16726	0.0769211
2.16726	0.28646
2.16726	1.25932
0.965115	-0.488885
0.910197	0.744474
0.907688	0.735447
0.907573	-1.2852
0.907568	-1.70025
1.6202	0.981263
1.67512	-0.914176
1.67762	-0.208445
1.67774	1.57798
0.352119	1.72837
1.67774	2.07162
1.67774	1.61364
1.67774	-0.473212
1.67774	-2.23918
0.4756	-2.67972
2.05217	-0.580498
2.10708	0.2528
2.10959	0.202562
2.10971	0.725007
0.907568	-0.452265
2.05479	1.15622
0.905059	1.13284
0.852535	-0.627506
0.850135	-0.412911
0.850026	0.782316
1.62282	2.04769
1.67523	1.00233
0.349615	0.868203
1.67763	-0.423833
0.35201	-0.883255
1.67774	0.251209
1.67774	0.903977
1.67774	0.76609
0.4756	-0.151402
0.850021	-0.654391
0.420682	-0.529005
1.62032	0.435126
1.67512	0.0538979
0.852644	0.430105
0.907562	1.02591
0.781583	0.0578759
2.10971	0.737426
0.907682	-0.595914
2.05491	-0.595791
0.905179	-2.00202
0.365638	-0.845803
0.363134	-0.734524
0.36302	-0.156329
0.363014	-0.0798753
0.910082	-1.27683
2.10983	-0.242728
0.962491	0.138048
2.11222	0.337379
2.16475	0.230065
2.16715	0.659609
2.16725	-0.187828
2.16726	0.432022
0.965115	-0.47897
0.910197	0.0351396
1.61757	0.0374154
1.67249	-0.205315
1.675	-0.250631
1.67511	-0.398402
1.67512	-0.0439858
1.67512	0.745196
1.67512	0.992896
0.472971	0.871218
0.418053	-0.690498
0.415544	-0.305073
0.907568	0.303319
0.417938	-1.22639
0.417933	-1.00878
0.417932	-0.0539035
0.417932	-0.317538
2.10972	1.03389
0.962487	-0.214795
0.363134	1.50839
0.363134	-0.777133
0.363134	0.839562
0.363134	-0.361889
0.910077	-0.933383
0.415544	0.0919324
2.10983	0.340263
2.16464	0.768706
2.16714	-0.630512
2.16725	1.93392
0.841634	-0.392143
0.965115	0.320274
2.11234	-0.534639
2.16475	-0.225487
0.965001	-0.49303
1.56276	-0.0763812
0.291953	0.327455
0.294457	0.191638
0.294571	0.0669894
0.294577	0.177758
0.472971	-0.201552
0.420561	0.142408
0.905059	-0.0756243
1.62031	-0.417232
0.472976	1.04104
1.62271	3.12315
1.67523	-0.027584
0.34961	-0.199981
0.34961	-0.0347744
0.34961	-0.187024
0.34961	-1.04799
0.34961	0.207431
0.475485	-0.0516185
1.62282	0.776821
0.297201	1.37013
1.67524	-1.18231
1.67763	1.82703
1.67774	-0.00280619
0.352119	0.145132
1.67774	1.4507
1.67774	0.432893
1.67774	-1.60743
0.4756	0.598999
0.420682	1.04661
2.10708	-1.24711
2.162	1.25735
2.16451	1.8593
2.16463	1.32456
2.16463	0.542259
2.16463	0.358787
2.16463	0.864813
2.16463	0.893031
0.591888	-0.331669
0.150754	-0.444935
1.03302	-0.479524
0.651559	1.1711
0.986322	-0.596066
0.104053	0.346026
0.104053	-0.100064
1.126	1.35899
0.243732	-0.550161
0.243732	-1.08867
1.18428	0.725602
0.302013	0.227406
0.302013	-0.232284
0.302013	0.8052
0.302013	0.553659
1.2086	1.0067
0.32633	-0.642179
0.416433	0.251763
0.465836	-0.0933992
0.465836	0.301408
0.888216	0.376387
0.00594712	1.70356
0.00594712	0.129661
1.08507	0.460558
0.202798	0.0289002
1.1672	1.12627
0.39916	-0.873702
0.483109	-2.09116
0.483109	-0.180939
0.881009	-0.77061
1.08206	1.56378
1.16595	-1.04446
1.20095	-0.460243
1.21555	0.620505
1.22165	0.852443
0.421877	-0.371979
0.0881748	1.4462
0.794094	0.0264506
1.59641	0.0873255
1.93117	0.625464
2.07085	-0.265474
1.32782	-0.263077
2.26837	0.852011
1.49037	0.0310394
1.16575	-0.0167701
1.03031	-0.997994
0.973794	-0.907069
0.950214	-1.34812
0.940375	-1.40083
0.93627	0.124277
0.934557	0.748154
0.933842	-1.01122
0.933544	-0.745632
0.692941	-0.777932
1.00346	0.0544164
1.13303	-0.592888
0.250885	0.96038
1.18721	0.0274357
0.304997	-2.06145
1.20982	-0.465062
0.416921	0.199762
0.465326	0.887836
0.88842	-1.58982
1.08514	0.814734
0.202883	-1.88372
0.202886	0.179373
1.16724	-0.0554785
0.28497	-0.277543
1.20149	0.83071
0.413465	1.77132
0.468803	0.54723
0.468803	-1.59863
0.886978	-2.50597
0.00470913	-0.15544
0.00470918	-0.497644
0.0047092	-0.501164
0.0047092	2.29925
0.00470921	-1.0224
1.08455	0.54876
0.364673	-0.212382
0.517595	-0.28078
0.517595	-0.698173
0.0643068	0.670204
0.817962	-0.485581
0.741292	-0.318471
1.02376	0.218856
1.14162	0.0555567
1.1908	-0.108215
0.409006	-0.156322
0.473263	-1.25877
0.885117	0.63854
1.08377	0.304981
0.364349	-0.492697
0.0641716	1.97761
0.0610768	0.307928
0.113336	-0.713551
0.135142	-0.870377
1.81972	0.522879
2.15449	-0.342111
1.49185	1.24391
0.618682	-0.390528
2.02678	-1.68946
2.24618	1.05027
2.33773	-0.604298
2.37592	-1.00022
2.39186	0.0950543
1.5962	-0.797105
1.26421	0.0970166
0.416575	-0.936159
0.749754	-2.70156
0.00600646	-0.0104717
1.02729	0.0753581
0.202822	-1.14396
1.1431	-1.35579
0.284943	0.169797
1.19141	-0.439364
0.319208	0.0155104
1.21158	-0.0276657
1.21579	1.25749
0.337718	0.489369
0.33947	-1.68269
1.2235	-0.156064
0.341959	-0.206235
0.342264	-5.08389
1.22527	-0.775283
1.22557	0.0884778
0.343431	-0.932971
1.22583	-1.03208
0.343612	0.734205
0.423621	-0.00925201
0.458625	-0.392873
0.458616	0.501594
0.458612	-0.380873
0.458611	-0.19411
0.45861	0.154991
0.891231	-0.52899
0.00896222	-2.19283
1.08632	-0.0414948
0.204056	-2.33079
1.16773	0.495226
0.285458	-0.865362
1.20169	-0.186135
1.21586	0.929349
1.22178	0.543572
0.421931	0.128942
0.460338	-1.38953
0.0881973	0.235348
0.794071	-2.18527
0.75126	-0.418648
0.131008	0.139835
0.131008	-0.628569
1.02792	0.879141
1.14336	0.522084
1.19152	0.839558
1.21162	-0.972649
1.22001	-0.11471
0.421192	-0.429247
0.0878891	0.339886
0.0511808	-1.19945
0.109207	-0.20918
1.79379	0.990139
2.12855	0.608245
1.46592	0.689632
1.99175	0.30812
2.21115	-0.551925
2.30269	0.305777
2.34089	-0.804021
2.35683	0.346273
1.56117	0.311428
0.703109	-1.27357
0.713211	-0.25765
0.0848864	-1.35295
0.417891	-3.25363
0.556836	-1.18566
0.187502	0.871281
0.304237	0.958844
0.246043	0.305991
0.107522	0.138288
0.979924	-0.506201
0.155453	0.435816
0.321019	0.405744
1.33945	0.231889
1.66415	0.718721
1.79963	-0.562619
1.85616	-0.955324
1.87974	-0.0244881
1.88958	0.184899
1.89369	0.28128
1.8954	-1.4148
1.09381	-1.08272
0.759342	-0.816328
0.626197	-0.966735
0.116518	-0.0338183
0.975739	1.22572
0.151699	-0.30633
0.175995	-1.5287
0.186133	-0.0491166
1.15602	1.67792
0.277979	2.5421
0.279744	0.391394
0.280481	-0.234358
0.280788	-0.606469
0.280916	-1.52629
1.19974	-1.30626
1.215	-0.732196
0.419049	-0.580196
0.889254	-0.0244076
1.08545	0.0860728
1.16731	-0.600654
1.20146	-0.677704
1.21571	0.0952706
0.419348	0.165963
0.462867	0.256017
0.0871196	0.634041
0.795127	-0.0563139
0.0515018	-0.206285
0.109351	-0.65558
0.133488	0.540278
1.81806	-0.768579
1.35051	-0.933334
1.95773	-0.492965
1.40878	0.844601
0.536587	0.282085
1.18981	-0.44721
1.89655	-0.24724
2.19144	-0.0407711
2.31448	0.638209
1.56351	0.994549
1.25016	-0.0738235
0.430216	0.677245
0.321311	0.142529
0.26676	-1.3058
0.146206	-0.380854
0.713301	0.138243
0.0268483	-0.790384
0.89962	-0.34863
0.895657	0.0551853
0.707221	-0.793316
1.00789	-1.03905
0.331035	-0.261282
0.0486179	-0.0466049
0.06922	0.635054
0.683925	0.888746
0.19586	-0.717503
0.00778346	-0.177696
1.69071	0.216159
1.22247	1.80252
1.82941	1.10947
2.08266	0.231757
2.18832	-0.252881
1.4301	1.56922
0.6328	-0.414628
2.00101	1.23293
1.40146	-0.0796655
1.1513	0.645223
0.497828	0.725525
0.280061	0.500713
0.236509	2.22941
0.218337	-0.923479
0.983902	0.563233
0.315096	-0.484699
0.838351	0.393049
0.0363352	0.698699
1.06426	-1.42534
1.15536	0.977186
0.276252	0.476909
0.277572	0.804993
0.395537	0.685488
0.878947	0.100703
1.08065	0.702258
0.19893	0.180897
1.16536	-0.16009
1.20047	-1.1501
0.412812	1.02795
0.469226	1.49179
0.469131	0.405171
0.469091	1.00345
0.886841	0.997358
1.08448	0.33161
0.364626	1.08283
0.866583	0.79567
1.07602	0.585249
1.16341	0.569666
0.397562	-0.875845
0.880325	-0.141983
0.279445	-1.1265
0.0287286	0.0409691
0.0758821	0.0633914
0.119531	-0.214034
1.36296	0.147022
0.940039	1.30078
2.15706	-0.278899
2.29674	1.18071
2.35502	0.698451
1.57702	-1.20857
0.702354	-0.346883
2.06232	0.147259
1.18322	1.35085
2.26481	-0.957507
1.38386	-0.686151
1.38441	0.863734
2.34985	-0.837696
2.38455	1.38295
1.59671	-1.33709
0.714674	0.343616
2.07053	-1.41693
2.26814	-0.2892
1.54828	1.59168
2.05023	-1.23872
2.25967	1.20468
1.54474	-0.398737
1.24644	-0.92664
1.12197	-0.787278
1.07004	0.0829706
1.04837	-2.54914
0.1662	0.595177
0.636072	-0.697447
0.237155	0.322662
0.97986	0.420556
1.11953	1.88572
0.241036	-1.46081
1.18158	1.20927
1.2059	-1.24497
1.21604	3.11527
0.33535	-2.71843
1.22185	-0.569748
0.421306	1.75676
0.460306	-0.943629
0.890249	0.304391
1.08564	1.86334
0.203646	-1.68322
1.16744	1.69781
1.20146	-1.30716
1.21565	0.983188
0.419261	0.241361
0.086969	-0.350696
1.5975	1.62145
1.1299	0.320833
1.73711	0.77604
1.99047	0.51253
1.29387	0.279541
1.00321	-0.2385
1.68425	0.143748
1.96841	0.627407
1.28466	0.138342
0.999371	-0.116177
0.546562	-0.362951
0.216669	0.400505
0.942512	-0.274827
1.05805	-0.148026
0.225453	-0.929965
1.15593	1.183
0.294386	-0.340415
0.303033	0.0749642
1.20542	-1.02615
1.21381	-0.889168
0.335149	0.398296
1.22092	0.67008
0.340156	0.201367
1.22389	0.252213
0.422183	-1.1237
0.889987	0.425832
1.08518	1.60755
0.364307	-0.410618
0.0635258	1.74794
1.62043	-0.64945
1.95493	-0.818781
2.0945	-0.0115193
2.15273	0.0410394
2.17703	-0.133031
2.18717	-0.687104
2.1914	-0.431036
2.19317	-0.262128
1.39159	0.0899545
1.05713	4.79821
0.917583	-0.534842
0.859355	-1.98105
0.699726	0.354838
0.179811	0.0762595
0.678162	-1.01355
0.789486	-0.819453
1.03373	1.43539
0.161603	-3.19621
1.14578	-0.738669
1.18831	1.42917
1.20605	-0.510672
1.21345	3.6577
0.414228	1.8015
1.26612	1.92921
1.59912	-0.561035
0.935752	-2.57025
1.46128	0.444876
1.68055	-1.06654
1.13175	0.385256
1.3032	0.843171
1.80893	-0.778123
2.01994	-1.23748
1.30567	-2.25746
1.00764	0.556833
0.883292	1.69526
0.662148	0.572369
0.168235	-0.902334
0.99074	-0.407621
1.1062	-1.5539
1.15437	2.58958
0.293749	-2.14102
1.19612	-1.92567
1.2045	1.04299
1.208	-1.92281
1.20946	0.882528
0.466084	1.06944
0.797078	-0.820787
0.935185	1.53208
0.992809	-1.55292
1.01685	0.0932873
1.02689	-1.22862
0.228758	1.33106
0.698055	0.106385
0.0915547	-0.378995
0.640807	-0.269382
0.0676682	1.17152
0.171472	-0.711731
0.271253	2.36965
0.312887	0.415222
1.19576	-1.36833
0.393706	1.21934
0.471191	-1.22697
0.463943	1.48492
0.885981	0.573003
1.08111	0.768262
1.16253	0.97058
1.1965	-2.32898
0.408359	-0.987716
0.881823	2.99049
0.799734	-0.275947
0.330923	0.725696
0.937625	0.93163
0.388457	-0.420188
0.961631	0.0198018
1.20079	-0.343422
0.498261	1.16382
0.205134	-0.186367
0.88514	1.22279
1.16887	0.0157021
0.484944	0.432266
0.199577	-1.993
0.0779305	-2.95616
0.68527	1.11488
0.055336	0.013
0.64169	2.43097
0.190897	-0.972182
0.982204	-0.825952
1.10355	0.86373
1.15419	-1.6279
1.17531	1.68931
0.381815	1.03219
1.28204	1.08697
1.60815	-0.100298
1.74422	-1.52268
1.801	1.49497
1.82469	0.778725
1.83457	-0.651102
1.83869	0.0678767
1.84041	-0.46988
1.84113	-0.696072
1.84143	-0.0737292
1.03924	0.39695
0.704534	-0.0706177
0.564877	1.40662
0.506605	-0.177489
0.482291	0.412732
0.472146	0.0426898
0.467913	-0.0408499
0.466147	-1.36643
0.46541	0.863408
0.465103	-0.764687
0.464975	0.634935
0.464921	-2.15892
0.888575	-1.99959
1.08519	-0.203299
0.36492	1.0189
0.8667	0.596025
1.07607	-0.000729325
1.16342	-0.569884
0.281178	1.60491
0.281187	-1.73806
1.19991	0.706587
0.317641	0.420172
1.21512	1.79353
1.22146	0.786026
1.22411	-0.339829
1.22522	0.916093
0.342949	1.89767
1.22568	-0.314728
0.343411	-0.0445932
0.343411	0.39638
0.343411	-1.74196
1.22587	-0.32478
0.42364	-0.264046
0.458629	-0.547655
0.0889104	0.318482
0.793358	0.652732
0.793358	0.744295
0.751558	0.536151
1.02805	1.28044
0.341097	0.644432
0.856782	0.928408
1.07195	1.50354
0.189682	-0.541818
1.16173	-1.46186
1.19919	-0.573464
1.21482	-1.89243
0.419028	0.0162531
0.0869861	0.340115
0.0515576	-0.300393
0.109365	-1.64543
0.133484	-0.349222
0.143548	-0.918095
0.147747	-0.413177
0.1495	-0.302975
0.150231	-0.379761
0.150536	0.507989
0.150663	1.5179
0.150716	-1.20202
1.8353	0.330436
2.17006	0.278046
2.30974	1.17698
1.56571	-0.329836
2.05757	1.78435
1.01936	0.54026
0.578246	0.476049
0.224058	0.714511
0.40908	0.672732
0.305131	-0.128322
0.261758	-0.0775592
0.243661	0.323789
0.23611	-0.688444
0.232959	-1.24618
0.231645	-1.41721
0.231096	-1.48562
0.985932	0.285209
1.12561	1.0388
0.243569	1.30332
0.243665	0.610132
0.243705	0.618586
1.18425	1.92781
1.20857	2.22553
0.326318	0.320084
0.326325	2.74589
0.416428	0.64006
0.465838	1.94119
0.888214	-0.160878
1.08506	-0.476773
1.1672	-0.11295
0.399158	1.64338
0.881007	1.13318
1.08206	2.83942
0.19979	2.33476
0.363633	1.58172
0.0638723	0.796277
0.0612022	6.5548
0.113389	1.53234
1.79797	0.212845
2.13273	-0.00692269
2.27241	0.205526
2.33069	0.354551
2.35501	0.270692
1.56284	1.60642
1.23231	1.49031
0.371821	3.86636
1.91849	-0.51256
1.3934	0.104639
1.1743	-0.266332
0.501194	-0.35568
0.0298532	0.0413716
0.6355	-6.08293
0.888205	-1.42132
0.993645	2.09953
0.202793	-0.739927
0.240936	-0.322811
0.256851	0.0102835
0.380802	1.89475
0.494826	-1.51874
0.873349	-0.207523
1.07609	1.78943
1.16069	1.85551
0.281189	-0.388428
1.19875	2.55834
0.317641	0.110633
1.21464	-1.07284
0.41847	2.06296
0.463316	-2.18261
0.889066	3.1661
0.00699843	-0.697161
1.08542	0.361652
1.16727	-0.238474
0.285081	-1.60994
1.2015	0.732897
1.21575	2.20982
0.333514	-0.457925
0.333529	-2.01306
1.22174	-0.0183667
0.33948	2.53427
0.339483	3.25393
1.22423	-1.61451
1.22527	3.00603
1.2257	1.04041
0.343431	-0.788299
1.22588	1.68429
1.22596	0.316735
0.423674	0.689753
0.458594	0.276568
0.458594	0.00473683
0.891237	1.17618
1.08633	1.03983
0.204058	0.872656
1.16773	1.84896
0.285459	0.384756
1.20169	0.125462
0.319423	-1.22715
0.413551	1.68479
0.468718	1.69944
0.887013	1.95059
0.00474465	-1.27178
1.08456	0.425622
0.202296	-0.483197
1.16699	-0.902861
0.399072	-1.10986
0.0786597	-0.616122
0.0550317	0.722468
0.691498	0.69045
1.00299	0.0272373
0.681595	-0.067885
1.01636	0.735662
1.15604	0.772872
1.21432	0.896036
0.436323	1.45815
0.914019	-0.918437
1.11334	1.34117
1.1965	1.17677
1.2312	0.289462
1.24568	2.01119
0.449408	-0.352945
0.117166	-1.09952
0.89507	3.09003
0.151429	0.697081
0.209271	-0.371231
0.233405	0.565826
1.1699	-2.05637
0.390217	1.91759
0.867207	0.351049
0.263918	1.29062
0.608281	-0.133203
0.824579	2.1082
0.0534876	-0.165703
0.0517345	-1.19882
0.051003	0.273917
1.061	1.30427
1.15685	-1.00447
1.19685	-1.24328
1.21354	0.663965
0.331574	0.976097
0.418493	-1.64409
0.0866357	-1.03548
0.750481	-2.05638
1.02747	2.37919
0.656984	0.998571
0.461456	-1.10775
1.67843	-0.157399
1.08271	0.3861
1.20226	-1.0633
1.25215	0.166727
1.47176	-0.495522
1.99758	-0.40878
2.21698	1.81929
2.30852	0.059778
2.34672	0.568598
1.56035	-0.402281
1.23223	0.244756
0.370778	1.65867
1.11614	0.04533
1.05902	-1.18279
1.03518	0.715097
0.640712	0.902813
0.231612	1.07682
0.981796	-0.904059
1.11996	1.11479
1.17761	0.127919
1.20167	-0.634577
1.2117	0.557901
0.333584	-0.254502
0.335316	0.167433
0.419459	-0.270882
0.0864437	1.04398
0.795103	-0.494889
0.794801	0.176859
0.75083	0.951601
0.131313	-0.323621
0.13126	-0.55591
0.131238	-0.116785
0.131229	-0.426733
0.131225	0.398778
1.02783	1.51411
0.145563	2.13109
0.145563	0.3572
0.145564	1.6189
0.341008	0.649716
0.856745	0.8327
1.07193	0.331557
0.35941	0.260801
0.864423	-0.926783
1.07514	-0.260665
1.16306	0.562631
0.280791	0.465942
0.397431	-0.236268
0.0779749	1.06192
1.60661	-0.32001
1.94137	-0.915604
2.08105	0.325943
2.13933	-0.238326
2.16365	0.859596
2.17379	-0.227601
2.17803	0.798727
2.17979	1.37248
2.18053	-0.899957
1.37852	-0.163261
1.04389	-0.651207
0.904265	0.350277
0.846006	-0.637028
0.0970301	-0.104728
0.954991	2.74667
0.944848	-0.315629
0.940616	-1.12637
0.93885	1.53355
0.938114	0.867535
0.937806	-1.43812
0.691159	1.41543
1.00272	0.255024
1.13271	4.27549
1.18695	2.82291
1.20959	-0.43924
0.416716	1.21816
0.888206	-0.915575
1.08493	2.96161
0.364705	0.772354
1.31975	0.507887
1.65446	1.85946
1.79411	0.00657181
1.85239	-0.405942
1.07439	-0.424092
1.55208	-0.221129
0.949085	0.186376
1.4998	-0.758005
0.92727	-1.37466
0.688384	1.50158
0.58871	1.83412
0.00695452	0.109703
0.66997	-0.550915
0.150102	-0.874307
0.690578	-1.64212
0.673225	2.38741
0.665984	0.349013
0.662963	-0.150434
0.661703	0.193853
0.0036523	0.533053
0.87809	-0.368058
0.877871	-0.930061
0.877779	-1.86032
0.716295	1.54825
1.01329	0.70203
1.13722	2.09516
1.18892	-1.17306
0.408185	1.17367
0.0824236	1.93381
0.748813	-0.970946
0.22455	0.537216
1.45999	-0.0826665
1.79474	-0.0175221
1.93441	-0.450847
1.19038	0.100614
1.68224	0.992532
1.88747	1.66938
1.97311	0.622134
2.00883	0.667743
2.02374	0.646035
2.02996	1.13291
1.23025	0.765211
0.896566	0.122212
0.757339	-1.38778
0.708495	-1.87575
0.951986	0.425564
1.05358	-0.965163
1.09597	-0.165751
0.271796	-0.314191
0.730618	1.15046
0.48859	0.12903
0.81324	-1.15532
0.146386	1.23551
0.670456	0.392422
0.889123	0.637656
0.178048	1.15907
0.683667	0.2964
0.0923222	-2.06659
0.154415	1.19262
0.257365	0.0767503
0.300321	-0.637187
1.18997	3.57138
0.325624	-1.57434
1.21097	-0.309187
1.21226	-0.155946
1.21279	0.676625
0.338003	-1.57381
1.2205	0.122807
0.341347	3.63978
1.22371	0.170049
1.22375	-0.118343
1.22376	0.497439
1.22377	2.45382
0.459508	-0.24987
0.793728	4.17285
0.93318	0.917575
0.991367	0.517466
1.01564	0.0287394
1.02577	0.54321
0.227689	0.674135
0.105311	0.588807
0.18527	-1.30668
0.149492	1.15489
0.513142	0.738875
0.789624	0.306744
0.904986	-0.38822
0.150808	-0.788914
0.163871	1.96104
0.507142	1.51563
0.787121	0.270119
0.903941	1.31777
0.952684	2.76059
0.17071	0.916293
0.572616	-1.31305
0.016624	1.40264
1.64323	-0.428079
1.95381	-0.0101905
2.08339	0.341073
2.13746	0.668199
2.16002	1.11902
1.36712	-0.556518
1.8386	-0.509353
2.03532	-0.0480815
1.31509	0.3355
1.01458	2.20764
0.889188	0.0131135
0.659255	-2.41285
0.134902	-0.1595
0.083883	-0.956345
0.17517	-0.567842
1.00512	1.34964
0.641371	1.66946
0.157928	0.0588374
0.0437867	0.129864
0.674361	1.77642
0.171693	-0.47887
0.0380433	0.189603
0.898482	-0.00250082
0.889374	-0.465738
0.0946174	-1.31053
0.131132	-0.0164074
1.0096	0.198175
1.81033	-0.0677528
1.34212	-0.375333
1.14676	-0.0532851
1.06524	1.30198
1.03123	0.598934
0.164197	-0.239761
0.170554	-0.283385
1.03863	-0.0737887
1.03271	-0.49077
0.649218	0.600442
0.982874	0.534538
1.12209	0.277941
0.377867	0.438274
0.501931	-0.846012
0.0698118	-1.1056
0.811426	0.0678232
0.0587235	-0.193027
0.940562	-0.975673
0.940383	0.0297047
0.690138	0.773504
1.00234	0.561055
1.13261	0.196241
0.384652	-0.399554
0.874881	-0.00027426
0.00731328	-0.418495
0.00728203	0.546994
0.007269	-0.00413918
1.07955	-0.00629245
0.197283	1.05414
0.197285	1.27344
1.1649	-1.01128
1.20051	-0.285409
1.21537	-0.231444
0.333102	0.468466
0.333102	-0.826259
0.419258	0.0838504
0.889395	0.351359
1.08556	0.951037
1.16741	0.387076
1.20156	-2.20497
0.413495	-0.740897
0.0846771	0.553597
0.0525211	-1.00201
0.109767	-0.159946
1.79435	-0.210435
2.12911	0.996491
1.46648	0.777726
1.99231	0.499078
2.21171	-0.379463
2.30325	3.76454
2.34145	-0.161614
2.35739	0.343657
1.56173	0.14739
1.22974	0.0234428
1.09122	-0.46263
1.03342	-0.152123
1.0093	0.539717
0.99924	-0.273514
0.995041	0.269385
0.136658	-0.329348
0.655688	0.134103
0.18398	-0.764795
0.789474	-1.66377
0.239802	0.14599
0.640715	-0.0650543
0.814517	1.22981
1.05358	-0.83613
1.15333	0.400874
0.392643	-0.343284
0.0752461	0.096083
0.057187	-1.10687
0.938725	0.544237
0.111713	1.12384
0.134769	0.080923
0.144389	0.757201
0.148403	-0.111352
0.150078	0.944991
1.83435	-0.153241
1.36668	-0.458526
1.97385	0.642945
1.42488	1.43846
1.99814	0.387678
2.23733	-0.347734
1.35576	-1.54114
1.35605	0.234526
1.53581	0.501812
2.045	-0.296069
1.45515	0.316204
0.572999	0.427265
1.20915	0.618203
1.10646	0.174621
1.06361	-0.781305
1.04574	0.541379
1.03828	0.246119
1.03516	0.0355082
0.649366	-1.25821
0.181796	-1.07627
0.0132972	0.420467
0.707613	1.05931
0.206099	0.527349
0.674871	-0.0390675
0.00185799	-1.40069
0.713143	0.707875
1.01148	0.42548
0.333642	-0.149188
0.050817	-0.544129
1.63322	0.582477
1.96776	-0.757825
1.30503	1.29548
1.83082	0.684746
1.06656	0.861793
1.3659	1.04185
1.12268	0.99366
1.82351	-0.411193
2.11592	0.439625
1.43562	0.286483
1.15177	1.3859
1.03333	1.74521
0.983913	0.0937244
0.150882	-0.345081
1.01253	-0.265402
1.00393	-1.48572
1.00034	-0.0398781
0.663698	-0.443955
0.989889	-3.50121
1.12599	-0.0598818
0.24522	1.68247
0.245845	-0.0778507
1.1849	1.21021
1.2086	2.35788
0.416171	-0.305943
0.465837	-0.387428
0.888107	-0.0322259
0.00594684	0.037529
0.00599224	0.664837
1.08507	-1.52887
1.16718	-2.18341
1.20145	-0.916772
1.21574	-1.65154
1.22171	1.16916
0.339457	0.231268
1.22421	-1.38485
0.42294	0.969325
0.0886106	-1.26735
0.0508876	-1.10188
0.109093	-0.612781
0.133379	-0.333319
0.143512	0.710029
0.14774	-0.447586
0.149504	-0.0640954
0.150241	-0.16172
0.150548	-1.08062
1.83512	-1.03762
2.16988	0.947311
2.30956	0.105558
2.36784	0.593964
2.39216	0.168889
2.4023	0.979392
2.40654	1.17354
2.4083	0.839733
1.60673	-1.37596
1.27227	-0.789879
1.13272	0.792135
1.07449	2.75074
1.0502	-1.4909
0.634255	1.14305
0.968965	1.53194
0.306309	2.38072
0.565823	-0.606803
0.0399543	-1.41832
0.726901	0.428894
1.01353	-0.261282
1.13312	1.18476
1.18302	-0.499094
0.401532	-0.687512
0.0754561	0.345485
1.6049	-0.0300663
1.93789	0.527317
2.07684	0.825853
2.13481	0.727089
1.35669	0.882441
1.03202	0.796465
1.69886	-0.280855
1.9771	0.583917
1.29088	1.33149
1.00456	1.40531
0.885092	-0.623605
0.835245	-0.0232025
0.814446	-0.49874
0.805768	0.656967
0.0595535	-0.164614
0.938201	0.618504
0.93669	-0.560323
0.691123	-2.00426
1.0022	-1.23781
1.132	0.39499
0.250357	2.19327
0.25062	1.59398
1.18705	1.23936
1.20964	1.19429
1.21907	0.143714
0.336912	-0.438253
0.420802	1.60164
0.889993	0.232223
1.08576	-0.718697
1.16745	1.75353
0.285223	-0.641154
1.20157	-0.615114
0.413483	0.272164
0.0846532	-2.04585
0.0525501	0.322958
0.411311	0.598198
0.860392	-0.821016
0.03777	-0.370013
0.03777	0.173977
0.03777	0.210499
0.860392	-0.690323
0.03777	0.935534
1.72528	0.0919963
2.08477	0.114245
2.23419	0.165484
2.2963	1.38864
2.32211	2.22679
2.33284	-0.549536
1.47241	0.487
1.11478	0.306324
0.966126	0.0313128
0.90434	-0.167566
0.878659	-0.618183
0.884393	-0.449156
1.24388	0.450133
0.356394	2.03015
0.36083	-0.310238
1.40841	0.800595
0.512095	-0.304911
1.47236	0.504461
0.574967	-2.54839
1.49894	-0.924378
1.50967	1.07549
0.61183	1.93744
0.649562	0.719917
0.248468	1.0746
1.15695	1.61715
1.36779	0.147821
1.45542	1.71271
1.49185	1.11424
1.50699	2.31134
0.60888	-0.485124
0.648445	-0.693592
0.291572	0.190089
1.47146	1.24988
0.966046	1.03543
0.755974	0.545347
1.53355	-0.176692
0.783719	0.416482
2.00508	1.0127
1.27452	-0.974723
0.438014	-0.273419
0.463641	0.727898
0.474292	-0.0359479
0.478719	0.596287
[truncated: 1,858 more rows]
