# Supplementary material for: Disruption of Nrxn1α within excitatory forebrain circuits drives value-based dysfunction
Source: eLife. 2020 Dec 4;9:e54838. doi: 10.7554/eLife.54838 (PMC7759380; doi:10.7554/eLife.54838)
Supplement: Figure 8—source data 1. [file elife-54838-fig8-data1.xlsx]

## Sheet: Delta Integral
Control	Control	Control	Control	Control	Control	Control	Mutant	Mutant	Mutant	Mutant	Mutant	Mutant	Mutant
-60.9592	-111.965	-94.0427	-75.8034	-33.2125	-82.0361	-63.8832	-43.7083	-57.7238	-60.8424	-56.446	-47.3298	-58.8809

## Sheet: Delta Slope
0.633665	0.661532	0.321565	0.234086	0.30414	0.364382	0.400735	-0.0476808	0.0939299	0.234024	0.250797	0.199449	0.393476

## Sheet: Integral_MixedModel Part 1
		Controls	Controls	Mutant	Mutant
Intercept		30.071	4.3002	17.743	3.9258
ExploreExploit(t)		0.47696	2.8324	-1.9071	2.3002
StayShift(t)		-19.157	4.2478	-4.7284	3.458
RAV(t)		-1.1811	3.7373	-2.9529	3.344
RPE (t-1)		-11.727	4.1627	-11.301	3.6867
Reward (t-1)		-54.013	5.9378	-38.274	5.2316

## Sheet: Integral_MixedModel Part 2
		Controls	Controls	Mutant	Mutant
Integral (t-1)		0.2793	0.013777	0.1979	0.013614
LatInit(t)		0.18852	0.033767	0.15868	0.022934

## Sheet: Integrals
	Control	Control	Control	Control	Control	Control	Control	Mutant	Mutant	Mutant	Mutant	Mutant	Mutant	Mutant
0μL	17.867	47.8884	38.2395	21.435	8.93962	12.81	13.9022	27.7505	20.8004	27.0054	16.8728	21.3398	17.2709
12μL	-43.0922	-64.0771	-55.8032	-54.3684	-24.2729	-69.2261	-49.9811	-15.9579	-36.9234	-33.837	-39.5732	-25.99	-41.61

## Sheet: LMM_ RAV ~Slope + Integral
	Integral	Slope
	Nex.23	Nex.199
2.88773	-1000
2.88592	-999
2.8841	-998
2.88229	-997
2.88048	-996
2.87866	-995
2.87685	-994
2.87504	-993
2.87322	-992
2.87141	-991
2.8696	-990
2.86778	-989
2.86597	-988
2.86416	-987
2.86234	-986
2.86053	-985
2.85872	-984
2.8569	-983
2.85509	-982
2.85328	-981
2.85146	-980
2.84965	-979
2.84784	-978
2.84602	-977
2.84421	-976
2.8424	-975
2.84058	-974
2.83877	-973
2.83696	-972
2.83514	-971
2.83333	-970
2.83152	-969
2.8297	-968
2.82789	-967
2.82608	-966
2.82426	-965
2.82245	-964
2.82064	-963
2.81882	-962
2.81701	-961
2.8152	-960
2.81338	-959
2.81157	-958
2.80976	-957
2.80794	-956
2.80613	-955
2.80432	-954
2.8025	-953
2.80069	-952
2.79888	-951
2.79706	-950
2.79525	-949
2.79344	-948
2.79162	-947
2.78981	-946
2.788	-945
2.78618	-944
2.78437	-943
2.78256	-942
2.78074	-941
2.77893	-940
2.77712	-939
2.7753	-938
2.77349	-937
2.77168	-936
2.76986	-935
2.76805	-934
2.76624	-933
2.76442	-932
2.76261	-931
2.7608	-930
2.75898	-929
2.75717	-928
2.75536	-927
2.75354	-926
2.75173	-925
2.74992	-924
2.7481	-923
2.74629	-922
2.74448	-921
2.74266	-920
2.74085	-919
2.73904	-918
2.73722	-917
2.73541	-916
2.7336	-915
2.73178	-914
2.72997	-913
2.72816	-912
2.72634	-911
2.72453	-910
2.72272	-909
2.7209	-908
2.71909	-907
2.71728	-906
2.71546	-905
2.71365	-904
2.71184	-903
2.71002	-902
2.70821	-901
2.7064	-900
2.70458	-899
2.70277	-898
2.70096	-897
2.69914	-896
2.69733	-895
2.69552	-894
2.6937	-893
2.69189	-892
2.69008	-891
2.68826	-890
2.68645	-889
2.68464	-888
2.68282	-887
2.68101	-886
2.6792	-885
2.67738	-884
2.67557	-883
2.67376	-882
2.67194	-881
2.67013	-880
2.66832	-879
2.6665	-878
2.66469	-877
2.66288	-876
2.66106	-875
2.65925	-874
2.65744	-873
2.65562	-872
2.65381	-871
2.652	-870
2.65018	-869
2.64837	-868
2.64656	-867
2.64474	-866
2.64293	-865
2.64112	-864
2.6393	-863
2.63749	-862
2.63568	-861
2.63386	-860
2.63205	-859
2.63024	-858
2.62842	-857
2.62661	-856
2.6248	-855
2.62298	-854
2.62117	-853
2.61936	-852
2.61754	-851
2.61573	-850
2.61392	-849
2.6121	-848
2.61029	-847
2.60848	-846
2.60666	-845
2.60485	-844
2.60304	-843
2.60122	-842
2.59941	-841
2.5976	-840
2.59578	-839
2.59397	-838
2.59216	-837
2.59034	-836
2.58853	-835
2.58672	-834
2.5849	-833
2.58309	-832
2.58128	-831
2.57946	-830
2.57765	-829
2.57584	-828
2.57402	-827
2.57221	-826
2.5704	-825
2.56858	-824
2.56677	-823
2.56496	-822
2.56314	-821
2.56133	-820
2.55952	-819
2.5577	-818
2.55589	-817
2.55408	-816
2.55226	-815
2.55045	-814
2.54864	-813
2.54682	-812
2.54501	-811
2.5432	-810
2.54138	-809
2.53957	-808
2.53776	-807
2.53594	-806
2.53413	-805
2.53232	-804
2.5305	-803
2.52869	-802
2.52688	-801
2.52506	-800
2.52325	-799
2.52144	-798
2.51962	-797
2.51781	-796
2.516	-795
2.51418	-794
2.51237	-793
2.51056	-792
2.50874	-791
2.50693	-790
2.50512	-789
2.5033	-788
2.50149	-787
2.49968	-786
2.49786	-785
2.49605	-784
2.49424	-783
2.49242	-782
2.49061	-781
2.4888	-780
2.48698	-779
2.48517	-778
2.48336	-777
2.48154	-776
2.47973	-775
2.47792	-774
2.4761	-773
2.47429	-772
2.47248	-771
2.47066	-770
2.46885	-769
2.46704	-768
2.46522	-767
2.46341	-766
2.4616	-765
2.45978	-764
2.45797	-763
2.45616	-762
2.45434	-761
2.45253	-760
2.45072	-759
2.4489	-758
2.44709	-757
2.44528	-756
2.44346	-755
2.44165	-754
2.43984	-753
2.43802	-752
2.43621	-751
2.4344	-750
2.43258	-749
2.43077	-748
2.42896	-747
2.42714	-746
2.42533	-745
2.42352	-744
2.4217	-743
2.41989	-742
2.41808	-741
2.41626	-740
2.41445	-739
2.41264	-738
2.41082	-737
2.40901	-736
2.4072	-735
2.40538	-734
2.40357	-733
2.40176	-732
2.39994	-731
2.39813	-730
2.39632	-729
2.3945	-728
2.39269	-727
2.39088	-726
2.38906	-725
2.38725	-724
2.38544	-723
2.38362	-722
2.38181	-721
2.38	-720
2.37818	-719
2.37637	-718
2.37456	-717
2.37274	-716
2.37093	-715
2.36912	-714
2.3673	-713
2.36549	-712
2.36368	-711
2.36186	-710
2.36005	-709
2.35824	-708
2.35642	-707
2.35461	-706
2.3528	-705
2.35098	-704
2.34917	-703
2.34736	-702
2.34554	-701
2.34373	-700
2.34192	-699
2.3401	-698
2.33829	-697
2.33648	-696
2.33466	-695
2.33285	-694
2.33104	-693
2.32922	-692
2.32741	-691
2.3256	-690
2.32378	-689
2.32197	-688
2.32016	-687
2.31834	-686
2.31653	-685
2.31472	-684
2.3129	-683
2.31109	-682
2.30928	-681
2.30746	-680
2.30565	-679
2.30384	-678
2.30202	-677
2.30021	-676
2.2984	-675
2.29658	-674
2.29477	-673
2.29296	-672
2.29114	-671
2.28933	-670
2.28752	-669
2.2857	-668
2.28389	-667
2.28208	-666
2.28026	-665
2.27845	-664
2.27664	-663
2.27482	-662
2.27301	-661
2.2712	-660
2.26938	-659
2.26757	-658
2.26576	-657
2.26394	-656
2.26213	-655
2.26032	-654
2.2585	-653
2.25669	-652
2.25488	-651
2.25306	-650
2.25125	-649
2.24944	-648
2.24762	-647
2.24581	-646
2.244	-645
2.24218	-644
2.24037	-643
2.23856	-642
2.23674	-641
2.23493	-640
2.23312	-639
2.2313	-638
2.22949	-637
2.22768	-636
2.22586	-635
2.22405	-634
2.22224	-633
2.22042	-632
2.21861	-631
2.2168	-630
2.21498	-629
2.21317	-628
2.21136	-627
2.20954	-626
2.20773	-625
2.20592	-624
2.2041	-623
2.20229	-622
2.20048	-621
2.19866	-620
2.19685	-619
2.19504	-618
2.19322	-617
2.19141	-616
2.1896	-615
2.18778	-614
2.18597	-613
2.18416	-612
2.18234	-611
2.18053	-610
2.17872	-609
2.1769	-608
2.17509	-607
2.17328	-606
2.17146	-605
2.16965	-604
2.16784	-603
2.16602	-602
2.16421	-601
2.1624	-600
2.16058	-599
2.15877	-598
2.15696	-597
2.15514	-596
2.15333	-595
2.15152	-594
2.1497	-593
2.14789	-592
2.14608	-591
2.14426	-590
2.14245	-589
2.14064	-588
2.13882	-587
2.13701	-586
2.1352	-585
2.13338	-584
2.13157	-583
2.12976	-582
2.12794	-581
2.12613	-580
2.12432	-579
2.1225	-578
2.12069	-577
2.11888	-576
2.11706	-575
2.11525	-574
2.11344	-573
2.11162	-572
2.10981	-571
2.108	-570
2.10618	-569
2.10437	-568
2.10256	-567
2.10074	-566
2.09893	-565
2.09712	-564
2.0953	-563
2.09349	-562
2.09168	-561
2.08986	-560
2.08805	-559
2.08624	-558
2.08442	-557
2.08261	-556
2.0808	-555
2.07898	-554
2.07717	-553
2.07536	-552
2.07354	-551
2.07173	-550
2.06992	-549
2.0681	-548
2.06629	-547
2.06448	-546
2.06266	-545
2.06085	-544
2.05904	-543
2.05722	-542
2.05541	-541
2.0536	-540
2.05178	-539
2.04997	-538
2.04816	-537
2.04634	-536
2.04453	-535
2.04272	-534
2.0409	-533
2.03909	-532
2.03728	-531
2.03546	-530
2.03365	-529
2.03184	-528
2.03002	-527
2.02821	-526
2.0264	-525
2.02458	-524
2.02277	-523
2.02096	-522
2.01914	-521
2.01733	-520
2.01552	-519
2.0137	-518
2.01189	-517
2.01008	-516
2.00826	-515
2.00645	-514
2.00464	-513
2.00282	-512
2.00101	-511
1.9992	-510
1.99738	-509
1.99557	-508
1.99376	-507
1.99194	-506
1.99013	-505
1.98832	-504
1.9865	-503
1.98469	-502
1.98288	-501
1.98106	-500
1.97925	-499
1.97744	-498
1.97562	-497
1.97381	-496
1.972	-495
1.97018	-494
1.96837	-493
1.96656	-492
1.96474	-491
1.96293	-490
1.96112	-489
1.9593	-488
1.95749	-487
1.95568	-486
1.95386	-485
1.95205	-484
1.95024	-483
1.94842	-482
1.94661	-481
1.9448	-480
1.94298	-479
1.94117	-478
1.93936	-477
1.93754	-476
1.93573	-475
1.93392	-474
1.9321	-473
1.93029	-472
1.92848	-471
1.92666	-470
1.92485	-469
1.92304	-468
1.92122	-467
1.91941	-466
1.9176	-465
1.91578	-464
1.91397	-463
1.91216	-462
1.91034	-461
1.90853	-460
1.90672	-459
1.9049	-458
1.90309	-457
1.90128	-456
1.89946	-455
1.89765	-454
1.89584	-453
1.89402	-452
1.89221	-451
1.8904	-450
1.88858	-449
1.88677	-448
1.88496	-447
1.88314	-446
1.88133	-445
1.87952	-444
1.8777	-443
1.87589	-442
1.87408	-441
1.87226	-440
1.87045	-439
1.86864	-438
1.86682	-437
1.86501	-436
1.8632	-435
1.86138	-434
1.85957	-433
1.85776	-432
1.85594	-431
1.85413	-430
1.85232	-429
1.8505	-428
1.84869	-427
1.84688	-426
1.84506	-425
1.84325	-424
1.84144	-423
1.83962	-422
1.83781	-421
1.836	-420
1.83418	-419
1.83237	-418
1.83056	-417
1.82874	-416
1.82693	-415
1.82512	-414
1.8233	-413
1.82149	-412
1.81968	-411
1.81786	-410
1.81605	-409
1.81424	-408
1.81242	-407
1.81061	-406
1.8088	-405
1.80698	-404
1.80517	-403
1.80336	-402
1.80154	-401
1.79973	-400
1.79792	-399
1.7961	-398
1.79429	-397
1.79248	-396
1.79066	-395
1.78885	-394
1.78704	-393
1.78522	-392
1.78341	-391
1.7816	-390
1.77978	-389
1.77797	-388
1.77616	-387
1.77434	-386
1.77253	-385
1.77072	-384
1.7689	-383
1.76709	-382
1.76528	-381
1.76346	-380
1.76165	-379
1.75984	-378
1.75802	-377
1.75621	-376
1.7544	-375
1.75258	-374
1.75077	-373
1.74896	-372
1.74714	-371
1.74533	-370
1.74352	-369
1.7417	-368
1.73989	-367
1.73808	-366
1.73626	-365
1.73445	-364
1.73264	-363
1.73082	-362
1.72901	-361
1.7272	-360
1.72538	-359
1.72357	-358
1.72176	-357
1.71994	-356
1.71813	-355
1.71632	-354
1.7145	-353
1.71269	-352
1.71088	-351
1.70906	-350
1.70725	-349
1.70544	-348
1.70362	-347
1.70181	-346
1.7	-345
1.69818	-344
1.69637	-343
1.69456	-342
1.69274	-341
1.69093	-340
1.68912	-339
1.6873	-338
1.68549	-337
1.68368	-336
1.68186	-335
1.68005	-334
1.67824	-333
1.67642	-332
1.67461	-331
1.6728	-330
1.67098	-329
1.66917	-328
1.66735	-327
1.66554	-326
1.66373	-325
1.66191	-324
1.6601	-323
1.65829	-322
1.65647	-321
1.65466	-320
1.65285	-319
1.65103	-318
1.64922	-317
1.64741	-316
1.64559	-315
1.64378	-314
1.64197	-313
1.64015	-312
1.63834	-311
1.63653	-310
1.63471	-309
1.6329	-308
1.63109	-307
1.62927	-306
1.62746	-305
1.62565	-304
1.62383	-303
1.62202	-302
1.62021	-301
1.61839	-300
1.61658	-299
1.61477	-298
1.61295	-297
1.61114	-296
1.60933	-295
1.60751	-294
1.6057	-293
1.60389	-292
1.60207	-291
1.60026	-290
1.59845	-289
1.59663	-288
1.59482	-287
1.59301	-286
1.59119	-285
1.58938	-284
1.58757	-283
1.58575	-282
1.58394	-281
1.58213	-280
1.58031	-279
1.5785	-278
1.57669	-277
1.57487	-276
1.57306	-275
1.57125	-274
1.56943	-273
1.56762	-272
1.56581	-271
1.56399	-270
1.56218	-269
1.56037	-268
1.55855	-267
1.55674	-266
1.55493	-265
1.55311	-264
1.5513	-263
1.54949	-262
1.54767	-261
1.54586	-260
1.54405	-259
1.54223	-258
1.54042	-257
1.53861	-256
1.53679	-255
1.53498	-254
1.53317	-253
1.53135	-252
1.52954	-251
1.52773	-250
1.52591	-249
1.5241	-248
1.52229	-247
1.52047	-246
1.51866	-245
1.51685	-244
1.51503	-243
1.51322	-242
1.51141	-241
1.50959	-240
1.50778	-239
1.50597	-238
1.50415	-237
1.50234	-236
1.50053	-235
1.49871	-234
1.4969	-233
1.49509	-232
1.49327	-231
1.49146	-230
1.48965	-229
1.48783	-228
1.48602	-227
1.48421	-226
1.48239	-225
1.48058	-224
1.47877	-223
1.47695	-222
1.47514	-221
1.47333	-220
1.47151	-219
1.4697	-218
1.46789	-217
1.46607	-216
1.46426	-215
1.46245	-214
1.46063	-213
1.45882	-212
1.45701	-211
1.45519	-210
1.45338	-209
1.45157	-208
1.44975	-207
1.44794	-206
1.44613	-205
1.44431	-204
1.4425	-203
1.44069	-202
1.43887	-201
1.43706	-200
1.43525	-199
1.43343	-198
1.43162	-197
1.42981	-196
1.42799	-195
1.42618	-194
1.42437	-193
1.42255	-192
1.42074	-191
1.41893	-190
1.41711	-189
1.4153	-188
1.41349	-187
1.41167	-186
1.40986	-185
1.40805	-184
1.40623	-183
1.40442	-182
1.40261	-181
1.40079	-180
1.39898	-179
1.39717	-178
1.39535	-177
1.39354	-176
1.39173	-175
1.38991	-174
1.3881	-173
1.38629	-172
1.38447	-171
1.38266	-170
1.38085	-169
1.37903	-168
1.37722	-167
1.37541	-166
1.37359	-165
1.37178	-164
1.36997	-163
1.36815	-162
1.36634	-161
1.36453	-160
1.36271	-159
1.3609	-158
1.35909	-157
1.35727	-156
1.35546	-155
1.35365	-154
1.35183	-153
1.35002	-152
1.34821	-151
1.34639	-150
1.34458	-149
1.34277	-148
1.34095	-147
1.33914	-146
1.33733	-145
1.33551	-144
1.3337	-143
1.33189	-142
1.33007	-141
1.32826	-140
1.32645	-139
1.32463	-138
1.32282	-137
1.32101	-136
1.31919	-135
1.31738	-134
1.31557	-133
1.31375	-132
1.31194	-131
1.31013	-130
1.30831	-129
1.3065	-128
1.30469	-127
1.30287	-126
1.30106	-125
1.29925	-124
1.29743	-123
1.29562	-122
1.29381	-121
1.29199	-120
1.29018	-119
1.28837	-118
1.28655	-117
1.28474	-116
1.28293	-115
1.28111	-114
1.2793	-113
1.27749	-112
1.27567	-111
1.27386	-110
1.27205	-109
1.27023	-108
1.26842	-107
1.26661	-106
1.26479	-105
1.26298	-104
1.26117	-103
1.25935	-102
1.25754	-101
1.25573	-100
1.25391	-99
1.2521	-98
1.25029	-97
1.24847	-96
1.24666	-95
1.24485	-94
1.24303	-93
1.24122	-92
1.23941	-91
1.23759	-90
1.23578	-89
1.23397	-88
1.23215	-87
1.23034	-86
1.22853	-85
1.22671	-84
1.2249	-83
1.22309	-82
1.22127	-81
1.21946	-80
1.21765	-79
1.21583	-78
1.21402	-77
1.21221	-76
1.21039	-75
1.20858	-74
1.20677	-73
1.20495	-72
1.20314	-71
1.20133	-70
1.19951	-69
1.1977	-68
1.19589	-67
1.19407	-66
1.19226	-65
1.19045	-64
1.18863	-63
1.18682	-62
1.18501	-61
1.18319	-60
1.18138	-59
1.17957	-58
1.17775	-57
1.17594	-56
1.17413	-55
1.17231	-54
1.1705	-53
1.16869	-52
1.16687	-51
1.16506	-50
1.16325	-49
1.16143	-48
1.15962	-47
1.15781	-46
1.15599	-45
1.15418	-44
1.15237	-43
1.15055	-42
1.14874	-41
1.14693	-40
1.14511	-39
1.1433	-38
1.14149	-37
1.13967	-36
1.13786	-35
1.13605	-34
1.13423	-33
1.13242	-32
1.13061	-31
1.12879	-30
1.12698	-29
1.12517	-28
1.12335	-27
1.12154	-26
1.11973	-25
1.11791	-24
1.1161	-23
1.11429	-22
1.11247	-21
1.11066	-20
1.10885	-19
1.10703	-18
1.10522	-17
1.10341	-16
1.10159	-15
1.09978	-14
1.09797	-13
1.09615	-12
1.09434	-11
1.09253	-10
1.09071	-9
1.0889	-8
1.08709	-7
1.08527	-6
1.08346	-5
1.08165	-4
1.07983	-3
1.07802	-2
1.07621	-1
1.07439	0
1.07258	1
1.07077	2
1.06895	3
1.06714	4
1.06533	5
1.06351	6
1.0617	7
1.05989	8
1.05807	9
1.05626	10
1.05445	11
1.05263	12
1.05082	13
1.04901	14
1.04719	15
1.04538	16
1.04357	17
1.04175	18
1.03994	19
1.03813	20
1.03631	21
1.0345	22
1.03269	23
1.03087	24
1.02906	25
1.02725	26
1.02543	27
1.02362	28
1.02181	29
1.01999	30
1.01818	31
1.01637	32
1.01455	33
1.01274	34
1.01093	35
1.00911	36
1.0073	37
1.00549	38
1.00367	39
1.00186	40
1.00005	41
0.998234	42
0.996421	43
0.994608	44
0.992794	45
0.990981	46
0.989168	47
0.987354	48
0.985541	49
0.983728	50
0.981914	51
0.980101	52
0.978288	53
0.976474	54
0.974661	55
0.972848	56
0.971034	57
0.969221	58
0.967408	59
0.965594	60
0.963781	61
0.961968	62
0.960154	63
0.958341	64
0.956528	65
0.954714	66
0.952901	67
0.951088	68
0.949274	69
0.947461	70
0.945648	71
0.943834	72
0.942021	73
0.940208	74
0.938394	75
0.936581	76
0.934768	77
0.932954	78
0.931141	79
0.929328	80
0.927514	81
0.925701	82
0.923888	83
0.922074	84
0.920261	85
0.918448	86
0.916634	87
0.914821	88
0.913008	89
0.911194	90
0.909381	91
0.907568	92
0.905754	93
0.903941	94
0.902128	95
0.900314	96
0.898501	97
0.896688	98
0.894874	99
0.893061	100
0.891248	101
0.889434	102
0.887621	103
0.885808	104
0.883994	105
0.882181	106
0.880368	107
0.878554	108
0.876741	109
0.874928	110
0.873114	111
0.871301	112
0.869488	113
0.867674	114
0.865861	115
0.864048	116
0.862234	117
0.860421	118
0.858608	119
0.856794	120
0.854981	121
0.853168	122
0.851354	123
0.849541	124
0.847728	125
0.845914	126
0.844101	127
0.842288	128
0.840474	129
0.838661	130
0.836848	131
0.835034	132
0.833221	133
0.831407	134
0.829594	135
0.827781	136
0.825967	137
0.824154	138
0.822341	139
0.820527	140
0.818714	141
0.816901	142
0.815087	143
0.813274	144
0.811461	145
0.809647	146
0.807834	147
0.806021	148
0.804207	149
0.802394	150
0.800581	151
0.798767	152
0.796954	153
0.795141	154
0.793327	155
0.791514	156
0.789701	157
0.787887	158
0.786074	159
0.784261	160
0.782447	161
0.780634	162
0.778821	163
0.777007	164
0.775194	165
0.773381	166
0.771567	167
0.769754	168
0.767941	169
0.766127	170
0.764314	171
0.762501	172
0.760687	173
0.758874	174
0.757061	175
0.755247	176
0.753434	177
0.751621	178
0.749807	179
0.747994	180
0.746181	181
0.744367	182
0.742554	183
0.740741	184
0.738927	185
0.737114	186
0.735301	187
0.733487	188
0.731674	189
0.729861	190
0.728047	191
0.726234	192
0.724421	193
0.722607	194
0.720794	195
0.718981	196
0.717167	197
0.715354	198
0.713541	199
0.711727	200
0.709914	201
0.708101	202
0.706287	203
0.704474	204
0.702661	205
0.700847	206
0.699034	207
0.697221	208
0.695407	209
0.693594	210
0.691781	211
0.689967	212
0.688154	213
0.686341	214
0.684527	215
0.682714	216
0.680901	217
0.679087	218
0.677274	219
0.675461	220
0.673647	221
0.671834	222
0.670021	223
0.668207	224
0.666394	225
0.664581	226
0.662767	227
0.660954	228
0.659141	229
0.657327	230
0.655514	231
0.653701	232
0.651887	233
0.650074	234
0.648261	235
0.646447	236
0.644634	237
0.642821	238
0.641007	239
0.639194	240
0.637381	241
0.635567	242
0.633754	243
0.631941	244
0.630127	245
0.628314	246
0.626501	247
0.624687	248
0.622874	249
0.621061	250
0.619247	251
0.617434	252
0.615621	253
0.613807	254
0.611994	255
0.610181	256
0.608367	257
0.606554	258
0.604741	259
0.602927	260
0.601114	261
0.599301	262
0.597487	263
0.595674	264
0.593861	265
0.592047	266
0.590234	267
0.588421	268
0.586607	269
0.584794	270
0.582981	271
0.581167	272
0.579354	273
0.577541	274
0.575727	275
0.573914	276
0.572101	277
0.570287	278
0.568474	279
0.566661	280
0.564847	281
0.563034	282
0.561221	283
0.559407	284
0.557594	285
0.555781	286
0.553967	287
0.552154	288
0.550341	289
0.548527	290
0.546714	291
0.544901	292
0.543087	293
0.541274	294
0.539461	295
0.537647	296
0.535834	297
0.534021	298
0.532207	299
0.530394	300
0.528581	301
0.526767	302
0.524954	303
0.523141	304
0.521327	305
0.519514	306
0.517701	307
0.515887	308
0.514074	309
0.512261	310
0.510447	311
0.508634	312
0.506821	313
0.505007	314
0.503194	315
0.501381	316
0.499567	317
0.497754	318
0.49594	319
0.494127	320
0.492314	321
0.4905	322
0.488687	323
0.486874	324
0.48506	325
0.483247	326
0.481434	327
0.47962	328
0.477807	329
0.475994	330
0.47418	331
0.472367	332
0.470554	333
0.46874	334
0.466927	335
0.465114	336
0.4633	337
0.461487	338
0.459674	339
0.45786	340
0.456047	341
0.454234	342
0.45242	343
0.450607	344
0.448794	345
0.44698	346
0.445167	347
0.443354	348
0.44154	349
0.439727	350
0.437914	351
0.4361	352
0.434287	353
0.432474	354
0.43066	355
0.428847	356
0.427034	357
0.42522	358
0.423407	359
0.421594	360
0.41978	361
0.417967	362
0.416154	363
0.41434	364
0.412527	365
0.410714	366
0.4089	367
0.407087	368
0.405274	369
0.40346	370
0.401647	371
0.399834	372
0.39802	373
0.396207	374
0.394394	375
0.39258	376
0.390767	377
0.388954	378
0.38714	379
0.385327	380
0.383514	381
0.3817	382
0.379887	383
0.378074	384
0.37626	385
0.374447	386
0.372634	387
0.37082	388
0.369007	389
0.367194	390
0.36538	391
0.363567	392
0.361754	393
0.35994	394
0.358127	395
0.356314	396
0.3545	397
0.352687	398
0.350874	399
0.34906	400
0.347247	401
0.345434	402
0.34362	403
0.341807	404
0.339994	405
0.33818	406
0.336367	407
0.334554	408
0.33274	409
0.330927	410
0.329114	411
0.3273	412
0.325487	413
0.323674	414
0.32186	415
0.320047	416
0.318234	417
0.31642	418
0.314607	419
0.312794	420
0.31098	421
0.309167	422
0.307354	423
0.30554	424
0.303727	425
0.301914	426
0.3001	427
0.298287	428
0.296474	429
0.29466	430
0.292847	431
0.291034	432
0.28922	433
0.287407	434
0.285594	435
0.28378	436
0.281967	437
0.280154	438
0.27834	439
0.276527	440
0.274714	441
0.2729	442
0.271087	443
0.269274	444
0.26746	445
0.265647	446
0.263834	447
0.26202	448
0.260207	449
0.258394	450
0.25658	451
0.254767	452
0.252954	453
0.25114	454
0.249327	455
0.247514	456
0.2457	457
0.243887	458
0.242074	459
0.24026	460
0.238447	461
0.236634	462
0.23482	463
0.233007	464
0.231194	465
0.22938	466
0.227567	467
0.225754	468
0.22394	469
0.222127	470
0.220314	471
0.2185	472
0.216687	473
0.214874	474
0.21306	475
0.211247	476
0.209434	477
0.20762	478
0.205807	479
0.203994	480
0.20218	481
0.200367	482
0.198554	483
0.19674	484
0.194927	485
0.193114	486
0.1913	487
0.189487	488
0.187674	489
0.18586	490
0.184047	491
0.182234	492
0.18042	493
0.178607	494
0.176794	495
0.17498	496
0.173167	497
0.171354	498
0.16954	499
0.167727	500
0.165914	501
0.1641	502
0.162287	503
0.160473	504
0.15866	505
0.156847	506
0.155033	507
0.15322	508
0.151407	509
0.149593	510
0.14778	511
0.145967	512
0.144153	513
0.14234	514
0.140527	515
0.138713	516
0.1369	517
0.135087	518
0.133273	519
0.13146	520
0.129647	521
0.127833	522
0.12602	523
0.124207	524
0.122393	525
0.12058	526
0.118767	527
0.116953	528
0.11514	529
0.113327	530
0.111513	531
0.1097	532
0.107887	533
0.106073	534
0.10426	535
0.102447	536
0.100633	537
0.0988201	538
0.0970068	539
0.0951934	540
0.0933801	541
0.0915668	542
0.0897534	543
0.0879401	544
0.0861268	545
0.0843134	546
0.0825001	547
0.0806867	548
0.0788734	549
0.0770601	550
0.0752467	551
0.0734334	552
0.0716201	553
0.0698067	554
0.0679934	555
0.0661801	556
0.0643667	557
0.0625534	558
0.0607401	559
0.0589267	560
0.0571134	561
0.0553001	562
0.0534867	563
0.0516734	564
0.0498601	565
0.0480467	566
0.0462334	567
0.04442	568
0.0426067	569
0.0407934	570
0.03898	571
0.0371667	572
0.0353534	573
0.03354	574
0.0317267	575
0.0299134	576
0.0281	577
0.0262867	578
0.0244734	579
0.02266	580
0.0208467	581
0.0190334	582
0.01722	583
0.0154067	584
0.0135933	585
0.01178	586
0.00996668	587
0.00815334	588
0.00634001	589
0.00452667	590
0.00271334	591
0.000900003	592
-0.000913332	593
-0.00272667	594
-0.00454	595
-0.00635334	596
-0.00816667	597
-0.00998001	598
-0.0117933	599
-0.0136067	600
-0.01542	601
-0.0172333	602
-0.0190467	603
-0.02086	604
-0.0226734	605
-0.0244867	606
-0.0263	607
-0.0281134	608
-0.0299267	609
-0.03174	610
-0.0335534	611
-0.0353667	612
-0.03718	613
-0.0389934	614
-0.0408067	615
-0.04262	616
-0.0444334	617
-0.0462467	618
-0.04806	619
-0.0498734	620
-0.0516867	621
-0.0535001	622
-0.0553134	623
-0.0571267	624
-0.0589401	625
-0.0607534	626
-0.0625667	627
-0.0643801	628
-0.0661934	629
-0.0680067	630
-0.0698201	631
-0.0716334	632
-0.0734467	633
-0.0752601	634
-0.0770734	635
-0.0788867	636
-0.0807001	637
-0.0825134	638
-0.0843267	639
-0.0861401	640
-0.0879534	641
-0.0897668	642
-0.0915801	643
-0.0933934	644
-0.0952068	645
-0.0970201	646
-0.0988334	647
-0.100647	648
-0.10246	649
-0.104273	650
-0.106087	651
-0.1079	652
-0.109713	653
-0.111527	654
-0.11334	655
-0.115153	656
-0.116967	657
-0.11878	658
-0.120593	659
-0.122407	660
-0.12422	661
-0.126033	662
-0.127847	663
-0.12966	664
-0.131473	665
-0.133287	666
-0.1351	667
-0.136913	668
-0.138727	669
-0.14054	670
-0.142353	671
-0.144167	672
-0.14598	673
-0.147793	674
-0.149607	675
-0.15142	676
-0.153233	677
-0.155047	678
-0.15686	679
-0.158673	680
-0.160487	681
-0.1623	682
-0.164113	683
-0.165927	684
-0.16774	685
-0.169554	686
-0.171367	687
-0.17318	688
-0.174994	689
-0.176807	690
-0.17862	691
-0.180434	692
-0.182247	693
-0.18406	694
-0.185874	695
-0.187687	696
-0.1895	697
-0.191314	698
-0.193127	699
-0.19494	700
-0.196754	701
-0.198567	702
-0.20038	703
-0.202194	704
-0.204007	705
-0.20582	706
-0.207634	707
-0.209447	708
-0.21126	709
-0.213074	710
-0.214887	711
-0.2167	712
-0.218514	713
-0.220327	714
-0.22214	715
-0.223954	716
-0.225767	717
-0.22758	718
-0.229394	719
-0.231207	720
-0.23302	721
-0.234834	722
-0.236647	723
-0.23846	724
-0.240274	725
-0.242087	726
-0.2439	727
-0.245714	728
-0.247527	729
-0.24934	730
-0.251154	731
-0.252967	732
-0.25478	733
-0.256594	734
-0.258407	735
-0.26022	736
-0.262034	737
-0.263847	738
-0.26566	739
-0.267474	740
-0.269287	741
-0.2711	742
-0.272914	743
-0.274727	744
-0.27654	745
-0.278354	746
-0.280167	747
-0.28198	748
-0.283794	749
-0.285607	750
-0.28742	751
-0.289234	752
-0.291047	753
-0.29286	754
-0.294674	755
-0.296487	756
-0.2983	757
-0.300114	758
-0.301927	759
-0.30374	760
-0.305554	761
-0.307367	762
-0.30918	763
-0.310994	764
-0.312807	765
-0.31462	766
-0.316434	767
-0.318247	768
-0.32006	769
-0.321874	770
-0.323687	771
-0.3255	772
-0.327314	773
-0.329127	774
-0.33094	775
-0.332754	776
-0.334567	777
-0.33638	778
-0.338194	779
-0.340007	780
-0.34182	781
-0.343634	782
-0.345447	783
-0.34726	784
-0.349074	785
-0.350887	786
-0.3527	787
-0.354514	788
-0.356327	789
-0.35814	790
-0.359954	791
-0.361767	792
-0.36358	793
-0.365394	794
-0.367207	795
-0.36902	796
-0.370834	797
-0.372647	798
-0.37446	799
-0.376274	800
-0.378087	801
-0.3799	802
-0.381714	803
-0.383527	804
-0.38534	805
-0.387154	806
-0.388967	807
-0.39078	808
-0.392594	809
-0.394407	810
-0.39622	811
-0.398034	812
-0.399847	813
-0.40166	814
-0.403474	815
-0.405287	816
-0.4071	817
-0.408914	818
-0.410727	819
-0.41254	820
-0.414354	821
-0.416167	822
-0.41798	823
-0.419794	824
-0.421607	825
-0.42342	826
-0.425234	827
-0.427047	828
-0.42886	829
-0.430674	830
-0.432487	831
-0.4343	832
-0.436114	833
-0.437927	834
-0.43974	835
-0.441554	836
-0.443367	837
-0.44518	838
-0.446994	839
-0.448807	840
-0.45062	841
-0.452434	842
-0.454247	843
-0.45606	844
-0.457874	845
-0.459687	846
-0.4615	847
-0.463314	848
-0.465127	849
-0.46694	850
-0.468754	851
-0.470567	852
-0.47238	853
-0.474194	854
-0.476007	855
-0.47782	856
-0.479634	857
-0.481447	858
-0.48326	859
-0.485074	860
-0.486887	861
-0.4887	862
-0.490514	863
-0.492327	864
-0.49414	865
-0.495954	866
-0.497767	867
-0.49958	868
-0.501394	869
-0.503207	870
-0.505021	871
-0.506834	872
-0.508647	873
-0.510461	874
-0.512274	875
-0.514087	876
-0.515901	877
-0.517714	878
-0.519527	879
-0.521341	880
-0.523154	881
-0.524967	882
-0.526781	883
-0.528594	884
-0.530407	885
-0.532221	886
-0.534034	887
-0.535847	888
-0.537661	889
-0.539474	890
-0.541287	891
-0.543101	892
-0.544914	893
-0.546727	894
-0.548541	895
-0.550354	896
-0.552167	897
-0.553981	898
-0.555794	899
-0.557607	900
-0.559421	901
-0.561234	902
-0.563047	903
-0.564861	904
-0.566674	905
-0.568487	906
-0.570301	907
-0.572114	908
-0.573927	909
-0.575741	910
-0.577554	911
-0.579367	912
-0.581181	913
-0.582994	914
-0.584807	915
-0.586621	916
-0.588434	917
-0.590247	918
-0.592061	919
-0.593874	920
-0.595687	921
-0.597501	922
-0.599314	923
-0.601127	924
-0.602941	925
-0.604754	926
-0.606567	927
-0.608381	928
-0.610194	929
-0.612007	930
-0.613821	931
-0.615634	932
-0.617447	933
-0.619261	934
-0.621074	935
-0.622887	936
-0.624701	937
-0.626514	938
-0.628327	939
-0.630141	940
-0.631954	941
-0.633767	942
-0.635581	943
-0.637394	944
-0.639207	945
-0.641021	946
-0.642834	947
-0.644647	948
-0.646461	949
-0.648274	950
-0.650087	951
-0.651901	952
-0.653714	953
-0.655527	954
-0.657341	955
-0.659154	956
-0.660967	957
-0.662781	958
-0.664594	959
-0.666407	960
-0.668221	961
-0.670034	962
-0.671847	963
-0.673661	964
-0.675474	965
-0.677287	966
-0.679101	967
-0.680914	968
-0.682727	969
-0.684541	970
-0.686354	971
-0.688167	972
-0.689981	973
-0.691794	974
-0.693607	975
-0.695421	976
-0.697234	977
-0.699047	978
-0.700861	979
-0.702674	980
-0.704487	981
-0.706301	982
-0.708114	983
-0.709927	984
-0.711741	985
-0.713554	986
-0.715367	987
-0.717181	988
-0.718994	989
-0.720807	990
-0.722621	991
-0.724434	992
-0.726247	993
-0.728061	994
-0.729874	995
-0.731687	996
-0.733501	997
[truncated: 2,004 more rows]

## Sheet: Slope_MixedModel Part 1
		Controls	Controls	Mutant	Mutant
Intercept		0.15073	0.10407	0.044516	0.061186
Slope (t-1)		0.040684	0.014571	0.049456	0.014089
ExploreExploit(t)		0.0099967	0.036162	0.046975	0.029931
StayShift(t)		-0.021474	0.054288	0.01264	0.045043
RAV(t)		-0.13802	0.04712	-0.04435	0.044082
RPE (t-1)		-0.17434	0.05156	0.013404	0.047349
Reward (t-1)		0.49048	0.075428	0.12136	0.06886

## Sheet: Slope_MixedModel Part 2
		Controls	Controls	Mutant	Mutant
Integral(t)		-0.0015761	0.0001815	-0.0012991	0.00018153
LatInit(t)		9.7129e-05	0.00043084	-0.00017537	0.00030043

## Sheet: Slopes
	Control	Control	Control	Control	Control	Control	Control	Mutant	Mutant	Mutant	Mutant	Mutant	Mutant	Mutant
0μL	-0.00135721	-0.130348	-0.0827375	0.0621044	0.277511	0.019009	0.198325	0.106598	0.0315911	0.175494	0.0545207	-0.0408617	-0.272728
12μL	0.632308	0.531183	0.238828	0.29619	0.581651	0.383391	0.59906	0.058917	0.125521	0.409517	0.305318	0.158587	0.120748
