# Supplementary material for: Disruption of Nrxn1α within excitatory forebrain circuits drives value-based dysfunction
Source: eLife. 2020 Dec 4;9:e54838. doi: 10.7554/eLife.54838 (PMC7759380; doi:10.7554/eLife.54838)
Supplement: Source data 1. [file elife-54838-data1.xlsx]

## Sheet: Figure 1
Figure 1B: Performance	Test: Three-Way Anova	p-value
Comparison 1	Genotype: Nrxn1α Wildtype vs Nrxn1α Knockout	0.32
Comparison 2	Reward Discrepancy: 12μL vs. 10μL vs. 6μL vs 4μL	<0.0001
Comparison 3	Pr(Reward): 0.75 vs. 0.4	0.005
	Interactions	No Significant Interactions
Figure 1E: Relative Reward-Stay	Test: Three-Way Anova	p-value
Comparison 1	Genotype: Nrxn1α Wildtype vs Nrxn1α Knockout	0.0004
Comparison 2	Reward Discrepancy: 12μL vs. 10μL vs. 6μL vs 4μL	<0.0001
Comparison 3	Pr(Reward): 0.75 vs. 0.4	>0.05
	Interactions	No Significant Interactions
Figure 1F	Test: Linear Regression	p-value, R2
Top: Nrxn1α WT	Performance vs. Relative Reward-Stay, Pr(Rew) = 0.75	<0.0001, 0.86
Bottom: Nrxn1α KO	Performance vs. Relative Reward-Stay, Pr(Rew) = 0.75	<0.0001, 0.88
Figure 1G	Test: Linear Regression	p-value, R2
Top: Nrxn1α WT	Performance vs. Relative Reward-Stay, Pr(Rew) = 0.4	<0.0001, 0.61
Bottom: Nrxn1α KO	Performance vs. Relative Reward-Stay, Pr(Rew) = 0.4	<0.0001, 0.39

## Sheet: Figure 2
Figure 2A: Mean Initiation Latency	Test: Three-Way Anova	p-value
Comparison 1	Genotype: Nrxn1α Wildtype vs Nrxn1α Knockout	>0.05
Comparison 2	Reward Discrepancy: 12μL vs. 10μL vs. 6μL vs 4μL	>0.05
Comparison 3	Pr(Reward): 0.75 vs. 0.4	>0.05
	Interactions	No Significant Interactions
Figure 2C: Relative Initiation Latency	Test: Three-Way Anova	p-value
Comparison 1	Genotype: Nrxn1α Wildtype vs Nrxn1α Knockout	<0.0001
Comparison 2	Reward Discrepancy: 12μL vs. 10μL vs. 6μL vs 4μL	0.009
Comparison 3	Pr(Reward): 0.75 vs. 0.4	>0.05
	Interactions	No Significant Interactions
Figure 2D	Test: Linear Regression	p-value, R2
Top: Nrxn1α WT	Relative Initiation Latency vs. Relative Reward-Stay, Pr(Rew) = 0.75	<0.01, 0.27
Bottom: Nrxn1α KO	Relative Initiation Latency vs. Relative Reward-Stay, Pr(Rew) = 0.75	>0.05, 0.08
Figure 2E	Test: Linear Regression	p-value, R2
Top: Nrxn1α WT	Relative Initiation Latency vs. Relative Reward-Stay, Pr(Rew) = 0.4	<0.0001, 0.53
Bottom: Nrxn1α KO	Relative Initiation Latency vs. Relative Reward-Stay, Pr(Rew) = 0.4	>0.05, 0.06

## Sheet: Figure 3
Figure 3B: Pr(Low Effort)	Test: Two-Way Anova	p-value
Comparison 1	Genotype: Nrxn1α Wildtype vs Nrxn1α Knockout	0.025
Comparison 2	Trial	<0.0001
	Interaction: Genotype x Trial	>0.05
Trials 75-100: t-test	Nrxn1α Wildtype vs Nrxn1α Knockout	0.0228
Figure 3C: Latency to Initiate	Test: Two-Way Anova	p-value
Comparison 1	Genotype: Nrxn1α Wildtype vs Nrxn1α Knockout	>0.05
Comparison 2	Trial	<0.0001
	Interaction: Genotype x Trial	0.0029
Trials 75-100: t-test	Nrxn1α Wildtype vs Nrxn1α Knockout	>0.05
Figure 3D: Latency to Choice	Test: Two-Way Anova	p-value
Comparison 1	Genotype: Nrxn1α Wildtype vs Nrxn1α Knockout	0.078
Comparison 2	Trial	0.031
	Interaction: Genotype x Trial	0.018
Trials 75-100: t-test	Nrxn1α Wildtype vs Nrxn1α Knockout	0.0165

## Sheet: Figure 4
Figure 4C: Learning Rate	Test: Two-Way Anova	p-value
Comparison 1	Genotype: Nrxn1α Wildtype vs Nrxn1α Knockout	0.029
Comparison 2	Probability	>0.05
	Interaction: Genotype x Probability	>0.05
Figure 4D: Reward Differentiation	Test: Two-Way Anova	p-value
Comparison 1	Genotype: Nrxn1α Wildtype vs Nrxn1α Knockout	0.031
Comparison 2	Probability	>0.05
	Interaction: Genotype x Probability	>0.05
Figure 4F: Temperature Parameter	Test: Two-Way Anova	p-value
Comparison 1	Genotype: Nrxn1α Wildtype vs Nrxn1α Knockout	>0.05
Comparison 2	Probability	>0.05
	Interaction: Genotype x Probability	>0.05
Figure 4G: Persistence Coefficient	Test: Two-Way Anova	p-value
Comparison 1	Genotype: Nrxn1α Wildtype vs Nrxn1α Knockout	>0.05
Comparison 2	Probability	0.01
	Interaction: Genotype x Probability	>0.05

## Sheet: Figure 5
Figure 5D: Relative Reward-Stay	Test: Three-Way Anova	p-value
Comparison 1	Genotype: Nrxn1α+/+;NexCre/+ vs Nrxn1αC/C;NexCre/+	0.0009
Comparison 2	Reward Discrepancy: 12μL vs. 10μL vs. 6μL vs 4μL	<0.0001
Comparison 3	Pr(Reward): 0.75 vs. 0.4	>0.05
	Interactions	No Significant Interactions
Figure 5D: Relative Reward-Stay	Test: Three-Way Anova	p-value
Comparison 1	Genotype: Nrxn1αC/C;Nex+/+ vs Nrxn1αC/C;NexCre/+	0.011
Comparison 2	Reward Discrepancy: 12μL vs. 10μL vs. 6μL vs 4μL	<0.0001
Comparison 3	Pr(Reward): 0.75 vs. 0.4	>0.05
	Interactions	No Significant Interactions
Figure 5E: Learning Rate	Test: Mixed-Effects Analysis	p-value
Comparison 1	Genotype: Nrxn1αC/C;Nex+/+ vs Nrxn1α+/+;NexCre/+ vs. Nrxn1αC/C;NexCre/+	0.037
Comparison 2	Pr(Reward): 0.75 vs. 0.4	>0.05
Comparison 3	Interactions	No Significant Interactions
Figure 5F: Reward Differentiation	Test: Mixed-Effects Analysis	p-value
Comparison 1	Genotype: Nrxn1αC/C;Nex+/+ vs Nrxn1α+/+;NexCre/+ vs. Nrxn1αC/C;NexCre/+	0.043
Comparison 2	Pr(Reward): 0.75 vs. 0.4	>0.05
Comparison 3	Interactions	No Significant Interactions
Figure 5H: Temperature Parameter	Test: Mixed-Effects Analysis	p-value
Comparison 1	Genotype: Nrxn1αC/C;Nex+/+ vs Nrxn1α+/+;NexCre/+ vs. Nrxn1αC/C;NexCre/+	>0.05
Comparison 2	Pr(Reward): 0.75 vs. 0.4	0.008
Comparison 3	Interactions	No Significant Interactions
Figure 5I: Persistence Coefficient	Test: Mixed-Effects Analysis	p-value
Comparison 1	Genotype: Nrxn1αC/C;Nex+/+ vs Nrxn1α+/+;NexCre/+ vs. Nrxn1αC/C;NexCre/+	>0.05
Comparison 2	Pr(Reward): 0.75 vs. 0.4	0.0005
Comparison 3	Interactions	No Significant Interactions
Figure 5K: Pr(Low Effort Choice)	Test: Two-Way Anova	p-value
Comparison 1	Genotype: Nrxn1αC/C;Nex+/+ vs Nrxn1α+/+;NexCre/+ vs. Nrxn1αC/C;NexCre/+	0.022
Comparison 2	Trial	<0.0001
	Interaction: Genotype x Trial	>0.05
SteadyState: One-Way Anova, PostHoc	Nrxn1α+/+;NexCre/+ vs. Nrxn1αC/C;NexCre/+	0.0284
SteadyState: One-Way Anova, PostHoc	Nrxn1αC/C;Nex+/+ vs. Nrxn1αC/C;NexCre/+	0.0204

## Sheet: Figure 6
Figure 6D: Relative Reward-Stay	Test: Three-Way Anova	p-value
Comparison 1	Genotype: Nrxn1αC/C;Olig3+/+ vs Nrxn1αC/C;Olig3Cre/+	>0.05
Comparison 2	Reward Discrepancy: 12μL vs. 10μL vs. 6μL vs 4μL	<0.0001
Comparison 3	Pr(Reward): 0.75 vs. 0.4	>0.05
	Interactions	No Significant Interactions
Figure 6E: Learning Rate	Test: Mixed-Effects Analysis	p-value
Comparison 1	Genotype: Nrxn1αC/C;Olig3+/+ vs. Nrxn1αC/C;Olig3Cre/+	>0.05
Comparison 2	Pr(Reward): 0.75 vs. 0.4	>0.05
Comparison 3	Interactions	No Significant Interactions
Figure 6F: Reward Differentiation	Test: Mixed-Effects Analysis	p-value
Comparison 1	Genotype: Nrxn1αC/C;Olig3+/+ vs. Nrxn1αC/C;Olig3Cre/+	>0.05
Comparison 2	Pr(Reward): 0.75 vs. 0.4	>0.05
Comparison 3	Interactions	No Significant Interactions
Figure 6H: Temperature Parameter	Test: Mixed-Effects Analysis	p-value
Comparison 1	Genotype: Nrxn1αC/C;Olig3+/+ vs. Nrxn1αC/C;Olig3Cre/+	>0.05
Comparison 2	Pr(Reward): 0.75 vs. 0.4	>0.05
Comparison 3	Interactions	No Significant Interactions
Figure 6I: Persistence Coefficient	Test: Mixed-Effects Analysis	p-value
Comparison 1	Genotype: Nrxn1αC/C;Olig3+/+ vs Nrxn1αC/C;Olig3Cre/+	>0.05
Comparison 2	Pr(Reward): 0.75 vs. 0.4	0.005
Comparison 3	Interactions	No Significant Interactions
Figure 6K: Pr(Low Effort Choice)	Test: Two-Way Anova	p-value
Comparison 1	Genotype: Nrxn1αC/C;Olig3+/+ vs. Nrxn1αC/C;Olig3Cre/+	>0.05
Comparison 2	Trial	>0.05
	Interaction: Genotype x Trial	>0.05
Figure 6L: Latency to Initiate	Test: t-test	p-value
Comparison 1	Genotype: Nrxn1αC/C;Olig3+/+ vs Nrxn1αC/C;Olig3Cre/+	>0.05
Figure 6M: Latency to Choice	Test: t-test	p-value
Comparison 1	Genotype: Nrxn1αC/C;Olig3+/+vs. Nrxn1αC/C;Olig3Cre/+	>0.05

## Sheet: Figure 7
Figure 7H: Preinitiation Integral	Test: Paired t-test	p-value
Comparison	Previous Reward Volume: 12μL vs. 0μL	0.0002
Figure 7I	Test: Linear Regression	p-value, R2
Comparison	Preinitiation Integral vs. Comparative Action Value	<0.0001, 0.08
Figure 7K: Preinitiation Slope	Test: Paired t-test	p-value
Comparison 1	Previous Reward Volume: 12μL vs. 0μL	0.0006
Figure 7L	Test: Linear Regression	p-value, R2
Comparison	Preinitiation Slope vs. Comparative Action Value	<0.0001, 0.012

## Sheet: Figure 8
Figure 8C: ΔPreinitiation Integral	Test: t-test	p-value
Comparison	Nrxn1α+/+;NexCre/+ vs. Nrxn1αC/C;NexCre/+	0.0835
Figure 8F: ΔPreinitiation Slope	Test: t-test	p-value
Comparison	Nrxn1α+/+;NexCre/+ vs. Nrxn1αC/C;NexCre/+	0.0247
Figure 8G: Average Slope	Test: Two-Way Anova	p-value
Genotype	Nrxn1α+/+;NexCre/+ vs. Nrxn1αC/C;NexCre/+	0.0494
Previous Reward	12μL vs. 0μL	<0.0001
Interaction	Genotype x Previous Reward	0.0247
PostHoc Comparison	12μL: Nrxn1α+/+;NexCre/+ vs. Nrxn1αC/C;NexCre/+	0.0073
PostHoc Comparison	0μL: Nrxn1α+/+;NexCre/+ vs. Nrxn1αC/C;NexCre/+	>0.05
Figure 8H: Slow Ramp β Coefficients	Test: Linear Mixed-Effects Model	p-value
Nrxn1α+/+;NexCre/+	Coefficient
Reward (t-1)	-54.013	<0.0001
RPE (t-1)	-11.727	0.0042127
RAV(t)	-1.1811	0.63511
StayShift(t)	-19.157	<0.0001
ExploreExploit(t)	0.47696	0.61193
Integral(t-1)	0.2793	<0.0001
LatInit(t)	0.18852	<0.0001
Intercept	30.071	<0.0001
Nrxn1αC/C;NexCre/+	Coefficient
Reward (t-1)	-38.274	<0.0001
RPE (t-1)	-11.301	0.0020497
RAV(t)	-2.9529	0.41371
StayShift(t)	-4.7284	0.27111
ExploreExploit(t)	-1.9071	0.54299
Integral(t-1)	0.1979	<0.0001
LatInit(t)	0.15868	<0.0001
Intercept	17.743	<0.0001
Figure 8H: Fast Peak β Coefficients	Test: Linear Mixed-Effects Model	p-value
Nrxn1α+/+;NexCre/+	Coefficient
Reward (t-1)	0.49048	<0.0001
RPE (t-1)	-0.17434	0.0028409
RAV(t)	-0.13802	0.028486
StayShift(t)	-0.021474	0.45724
ExploreExploit(t)	0.0099967	0.0042819
Slope (t-1)	0.040684	0.0075017
Integral(t)	-0.0015761	<0.0001
LatInit(t)	9.7129e-05	0.82325
Intercept	0.15073	0.14096
Nrxn1αC/C;NexCre/+	Coefficient
Reward (t-1)	0.12136	0.051427
RPE (t-1)	0.013404	0.891
RAV(t)	-0.04435	0.11381
StayShift(t)	0.01264	0.46143
ExploreExploit(t)	0.046975	0.30368
Slope (t-1)	0.049456	0.00046961
Integral(t)	-0.0012991	<0.0001
LatInit(t)	-0.00017537	0.60045
Intercept	0.044516	0.25434

## Sheet: Figure 1-Supp1
Supp Figure 1B: Trial Initiations	Test: Two-Way Anova	p-value
Comparison 1	Genotype: Nrxn1α Wildtype vs Nrxn1α Knockout	>0.05
Comparison 2	Day	<0.0001
Interaction	Genotype x Day	>0.05
Supp Figure 1C: %Correct	Test: Two-Way Anova	p-value
Comparison 1	Genotype: Nrxn1α Wildtype vs Nrxn1α Knockout	>0.05
Comparison 2	Day	<0.0001
Interaction	Genotype x Day	>0.05
Supp Figure 1D: Mean Latency to Choice	Test: Two-Way Anova	p-value
Comparison 1	Genotype: Nrxn1α Wildtype vs Nrxn1α Knockout	0.01
Comparison 2	Day	>0.05
Interaction	Genotype x Day	>0.05
Supp Figure 1I: Adaptability	Test: Three-Way Anova	p-value
Comparison 1	Genotype: Nrxn1α Wildtype vs Nrxn1α Knockout	>0.05
Comparison 2	Reward Discrepancy: 12μL vs. 10μL vs. 6μL vs 4μL	>0.05
Comparison 3	Pr(Reward): 0.75 vs. 0.4	0.001
	Interactions	No Significant Interactions
Supp Figure 1J: Pr(Reward)	Test: Two-Way Anova	p-value
Comparison 1	Genotype: Nrxn1α Wildtype vs Nrxn1α Knockout	>0.05
Comparison 2	Trial	<0.0001
	Interaction: Genotype x Trial	>0.05
Supp Figure 1K: Pr(Reward)	Test: Two-Way Anova	p-value
Comparison 1	Genotype: Nrxn1α Wildtype vs Nrxn1α Knockout	>0.05
Comparison 2	Trial	<0.0001
	Interaction: Genotype x Trial	>0.05

## Sheet: Figure 2-Supp1
Supp. Figure 2A: Latency to Choice	Test: Three-Way Anova	p-value
Comparison 1	Genotype: Nrxn1α Wildtype vs Nrxn1α Knockout	0.0002
Comparison 2	Reward Discrepancy: 12μL vs. 10μL vs. 6μL vs 4μL	0.002
Comparison 3	Pr(Reward): 0.75 vs. 0.4	>0.05
	Interactions	No Significant Interactions
Supp. Figure 2B: Session Reward Volume	Test: Three-Way Anova	p-value
Comparison 1	Genotype: Nrxn1α Wildtype vs Nrxn1α Knockout	>0.05
Comparison 2	Reward Discrepancy: 12μL vs. 10μL vs. 6μL vs 4μL	<0.0001
Comparison 3	Pr(Reward): 0.75 vs. 0.4	<0.0001
	Interactions	No Significant Interactions
Supp. Figure 2C: Latency to Initiate	Test: Two-Way Anova	p-value
Comparison 1	Genotype: Nrxn1α Wildtype vs Nrxn1α Knockout	0.0004
Comparison 2	Trial	>0.05
	Interaction: Genotype x Trial	>0.05

[truncated: 5 more sheets: Figure 4-Supp1, Figure 5-Supp1, Figure 6-Supp1, Figure 7-Supp1, Figure 8-Supp1]
