# Supplementary figures and images for: Disruption of Nrxn1α within excitatory forebrain circuits drives value-based dysfunction
Source: eLife journal article supplement (doi:10.7554/elife.54838), 2020-12-04

Figure 8 - figure supplement 1

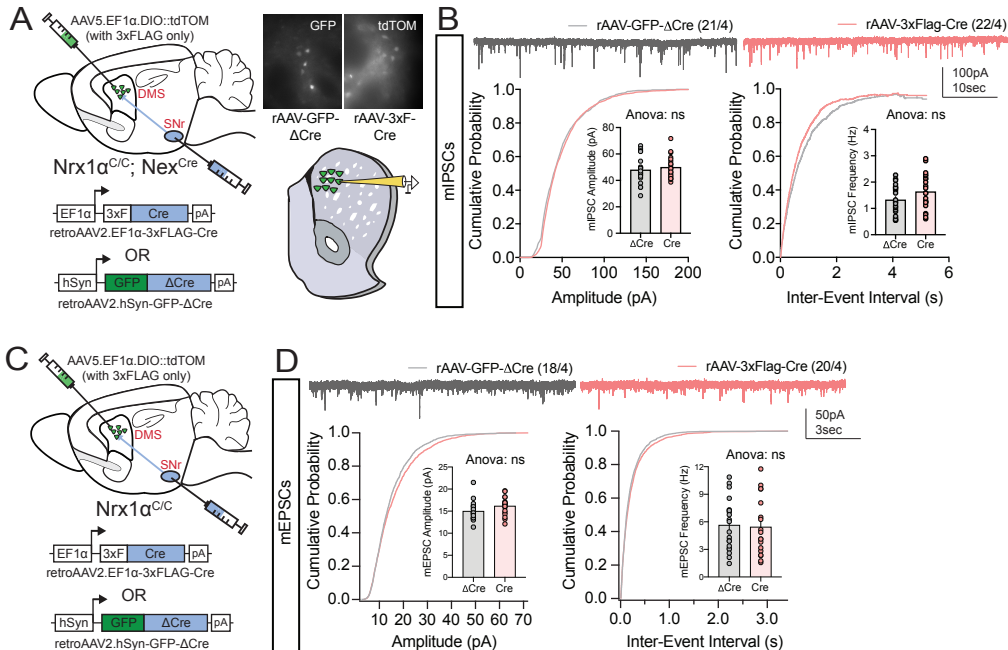

Supplement: supp [file elife-54838-supp-v1.zip]

Figure 5 - figure supplement 1

■  $Nrxn1\alpha^{+/+}$ ;  $Nex^{Cre/+}$  (n=11) ■  $Nrxn1\alpha^{fl/fl}$ ;  $Nex^{+/+}$  (n=14) ■  $Nrxn1\alpha^{fl/fl}$ ;  $Nex^{Cre/+}$  (n=13)

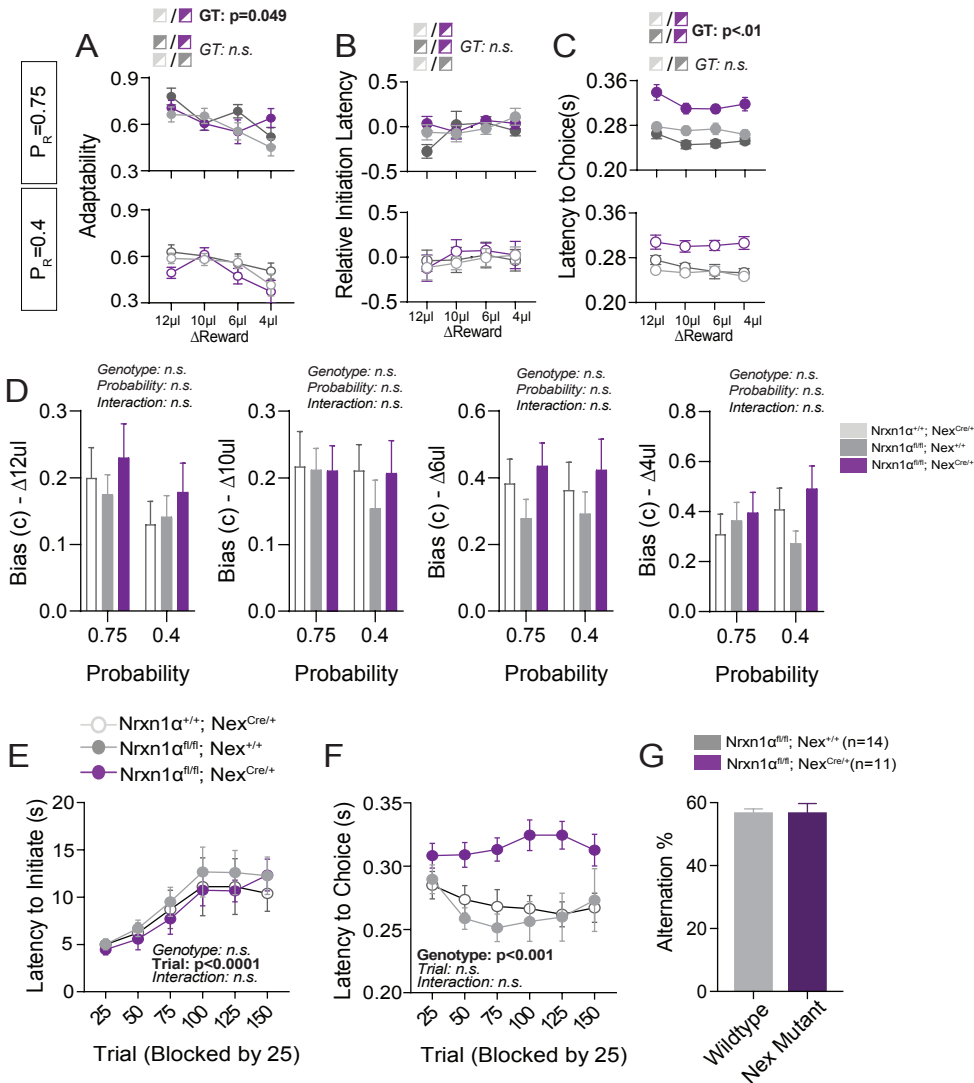

Supplement: supp [file elife-54838-supp-v1.zip]

Figure 2 - figure supplement 1

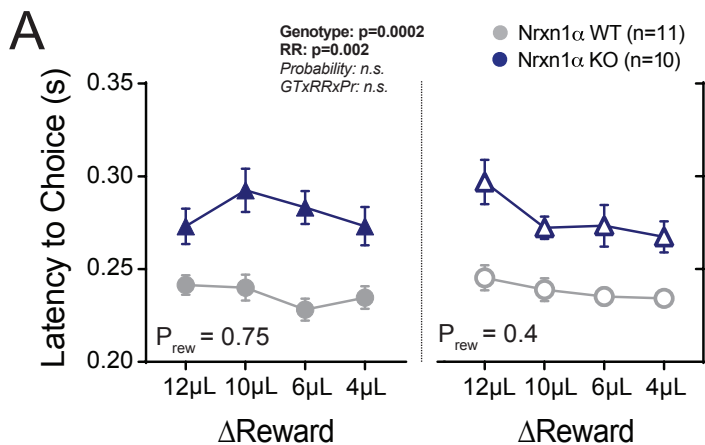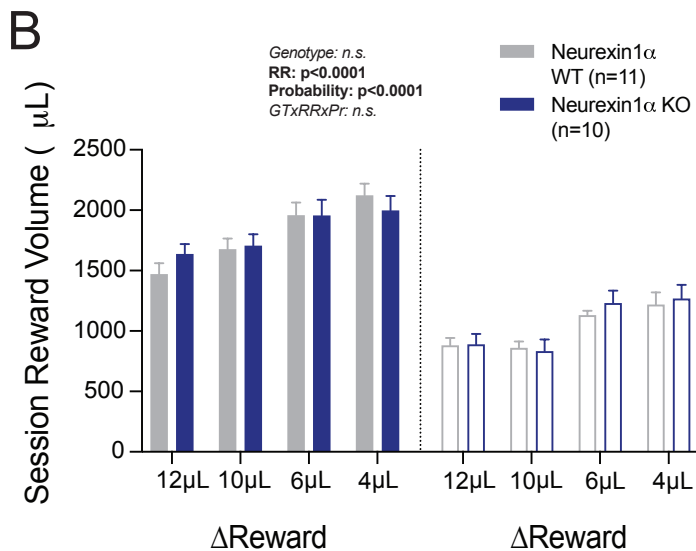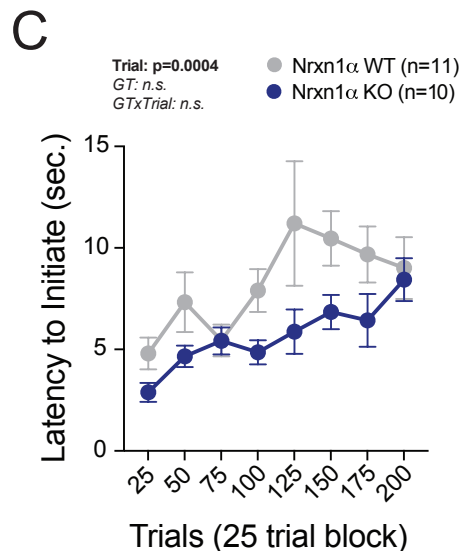

Supplement: supp [file elife-54838-supp-v1.zip]

Figure 1 - figure supplement 1

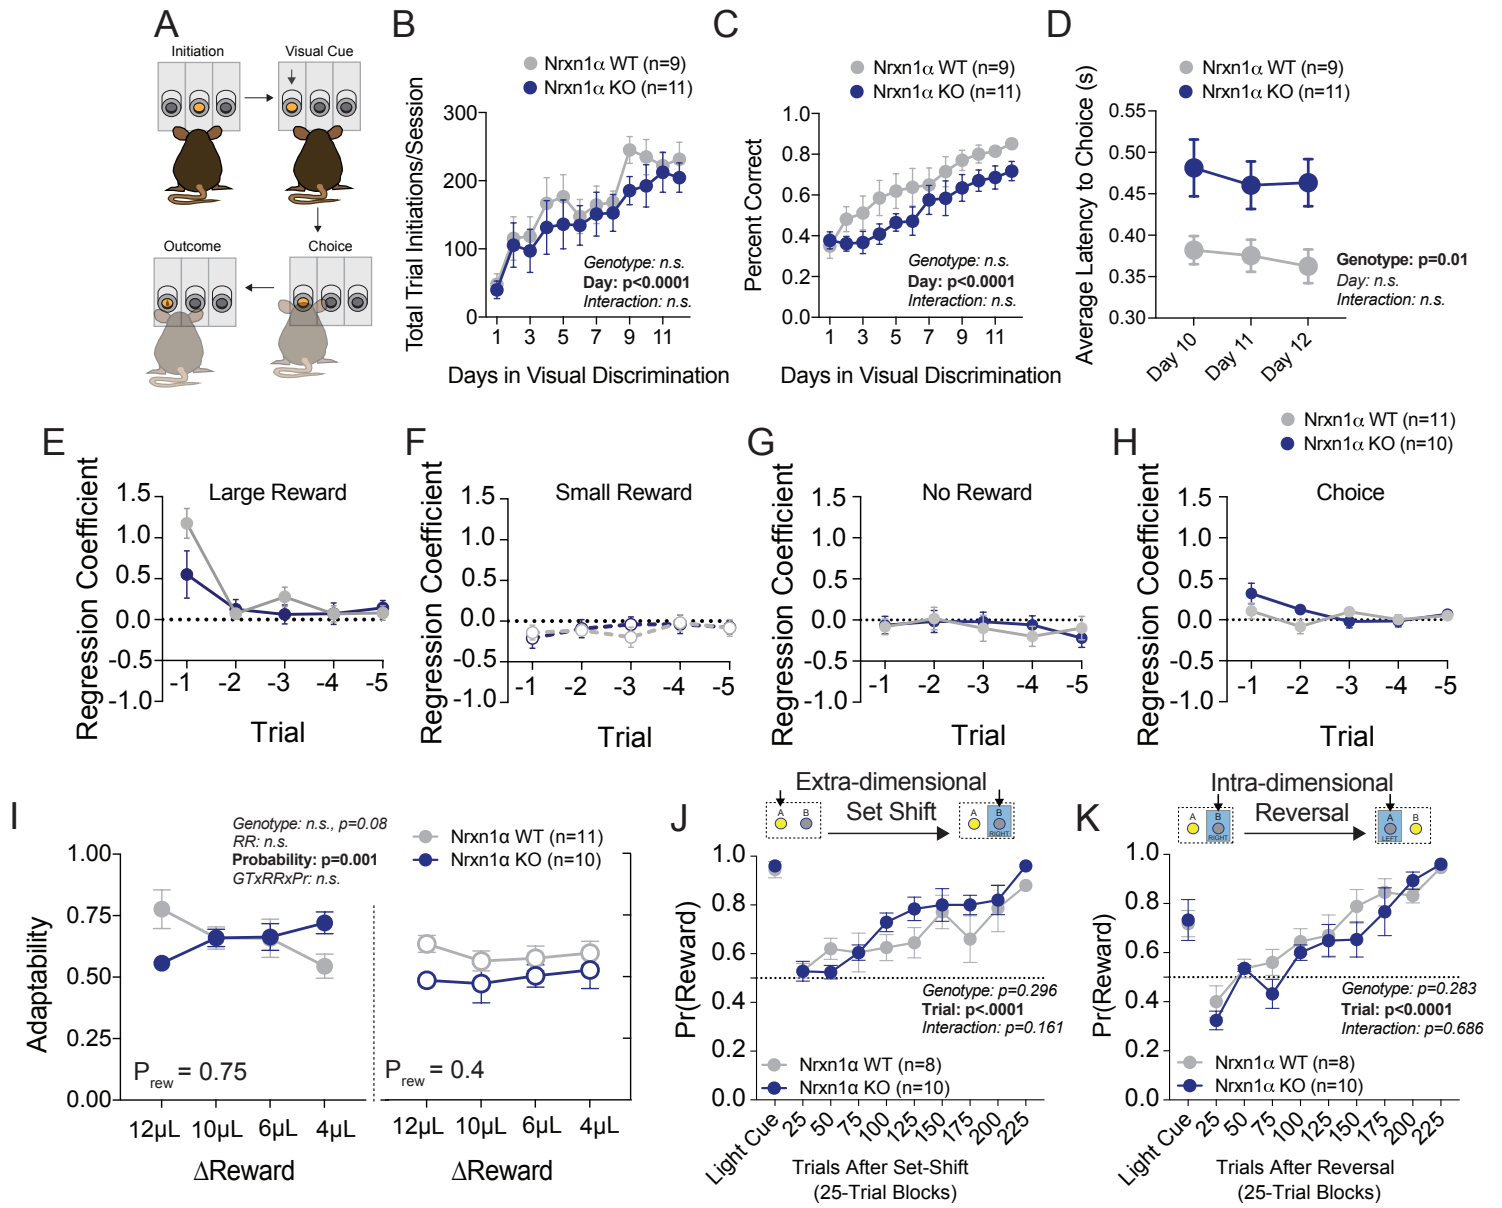

Supplement: supp [file elife-54838-supp-v1.zip]

# Figure 6 - figure supplement 1

■  $Nrxn1^{\Delta f/f}; Olig3^{+/+}$  (n=8)    ■  $Nrxn1^{\Delta f/f}; Olig3^{Cre/+}$  (n=10)

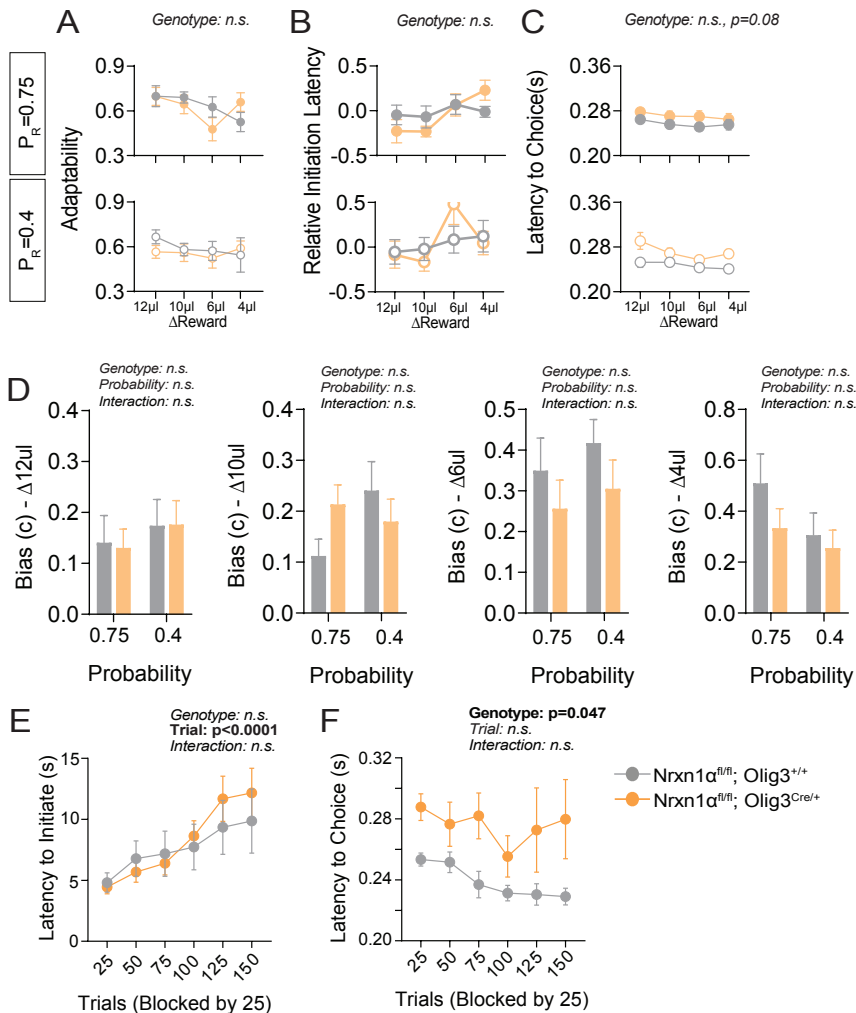

Supplement: supp [file elife-54838-supp-v1.zip]

# Figure 4 - figure supplement 1

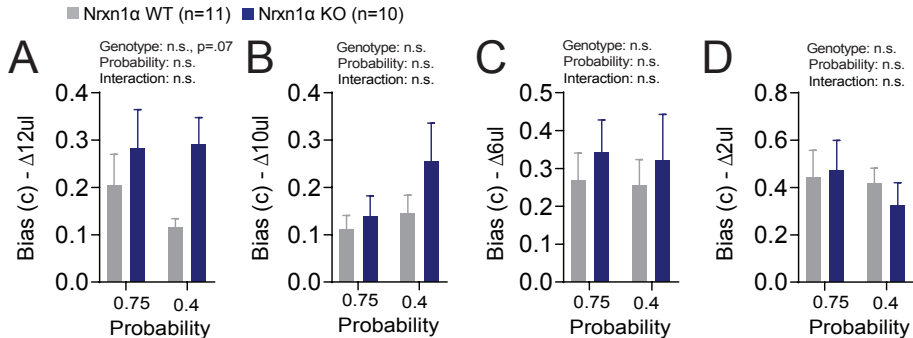

Supplement: supp [file elife-54838-supp-v1.zip]

# Figure 7 - figure supplement 1

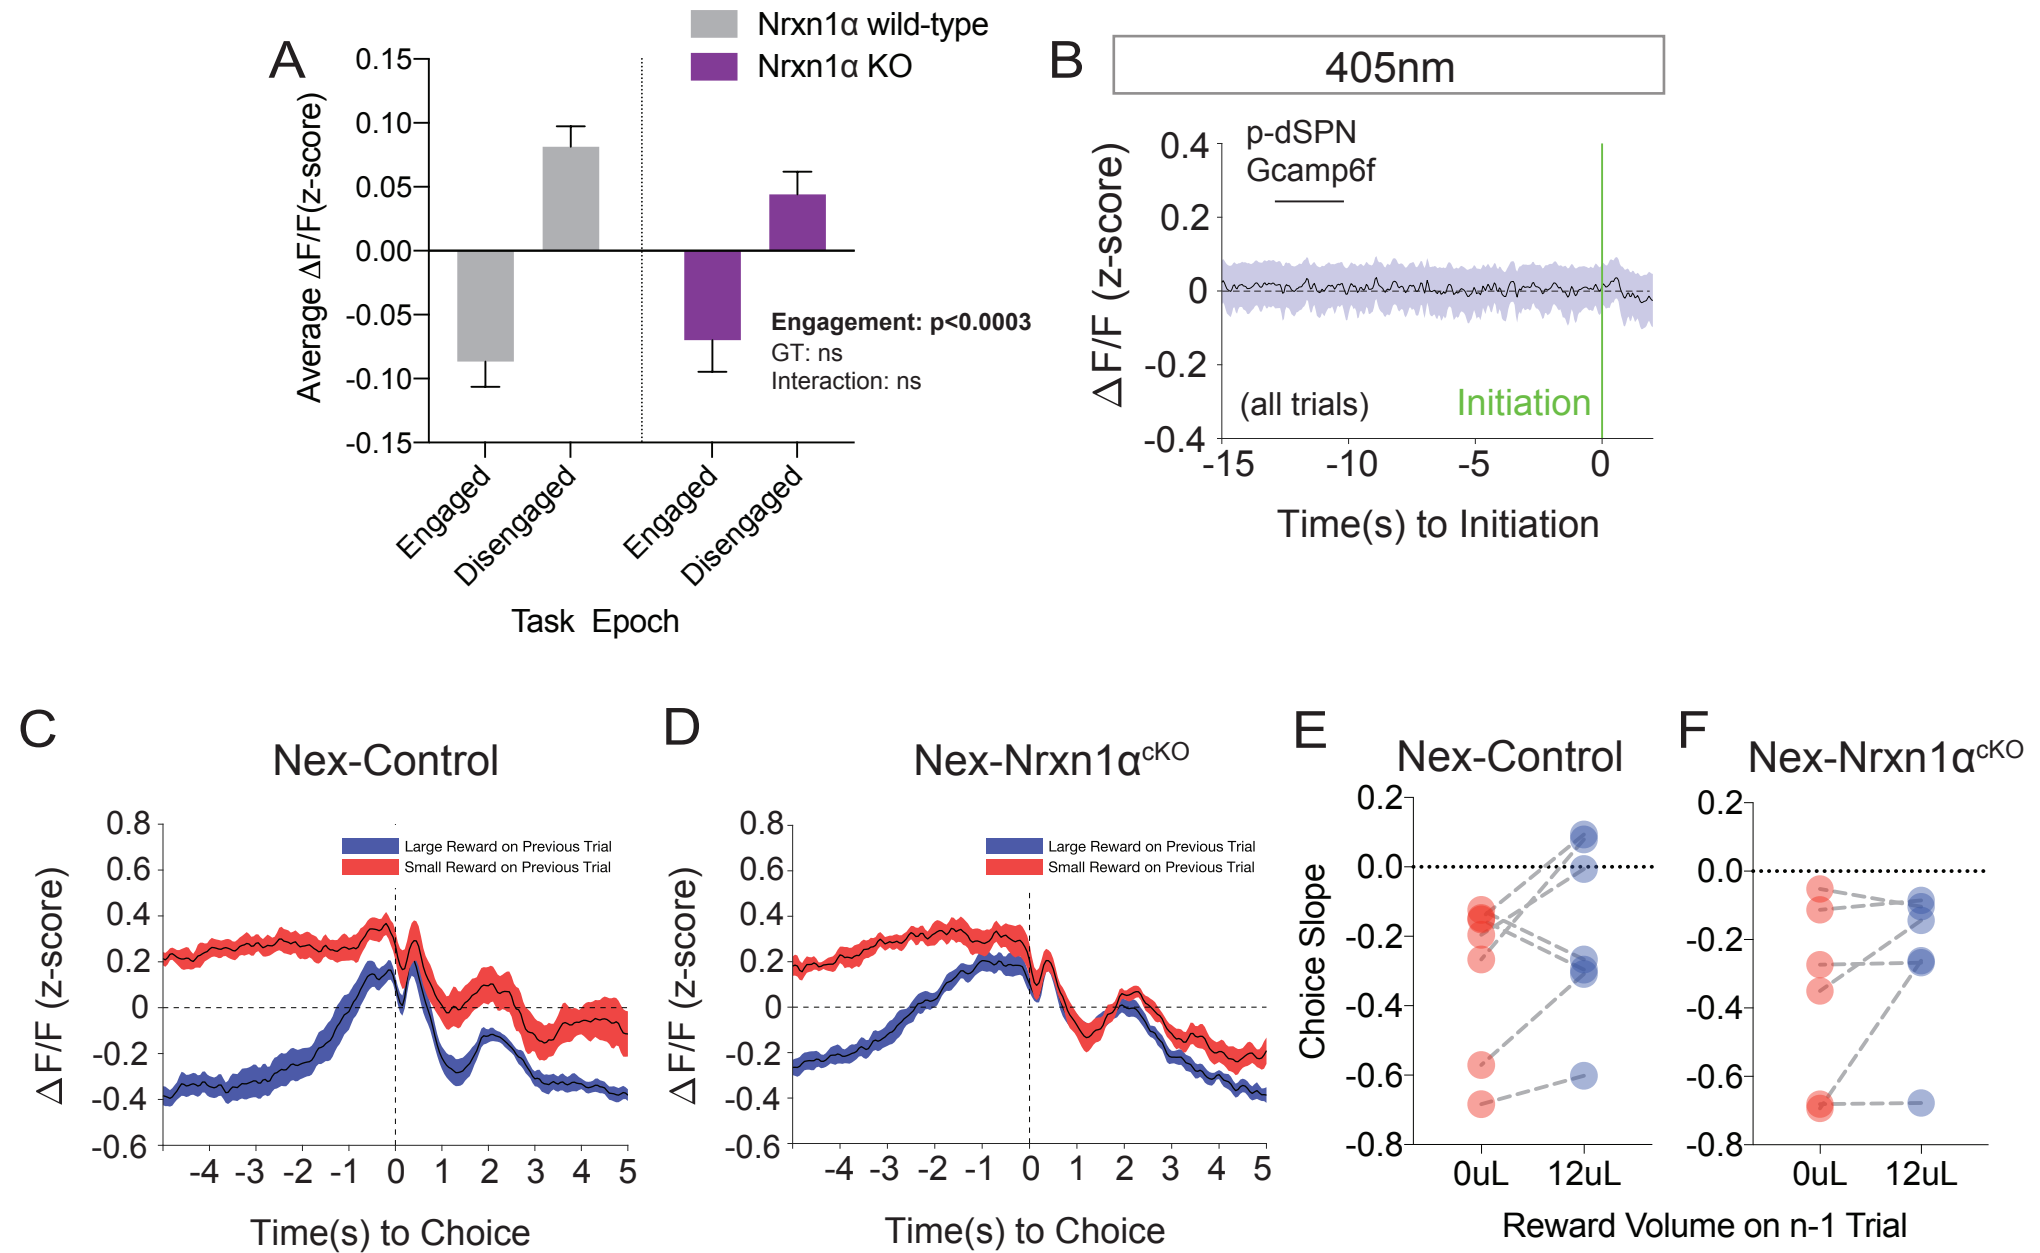

Supplement: supp [file elife-54838-supp-v1.zip]
